# Supplementary material for: Enantioselective oxidation of racemic secondary alcohols catalyzed by chiral Mn(iii)-salen complexes with N-bromosuccinimide as a powerful oxidant
Source: Royal Society of Chemistry journal article supplement (doi:10.1039/c2ob07087a), 2012-01-01

# Enantioselective Oxidation of Racemic Secondary Alcohols Catalyzed by Chiral Mn(III)-Salen Complex with N-Bromosuccinimide as a Powerful Oxidant

Daqian Xu,<sup>a,b</sup> Shoufeng Wang,<sup>a</sup> Zhiqiang Shen,<sup>a</sup> Chungu Xia<sup>a</sup> and Wei Sun<sup>\*a</sup>

<sup>a</sup> State key laboratory for Oxo Synthesis and Selective Oxidation, Lanzhou Institute of Chemical Physics, Chinese Academic of Sciences, Lanzhou 730000, China

<sup>b</sup> Graduate School of the Chinese Academy of Sciences, Beijing, China.

## 1. Instruments

NMR spectra were obtained on a BRUKER Avance III 400 MHz spectrometer operating at 400MHz for <sup>1</sup>H NMR and 100 MHz for <sup>13</sup>C NMR in CDCl<sub>3</sub>. The chemical shifts (δ) are reported in ppm and coupling constants (J) in Hz. High resolution mass spectra (HRMS) were recorded by Bruker micrOTOFQ-II (ESI). GC-MS was recorded by a Agilent 7890A/5975C. UV-vis spectra were obtained on a PE Lambda 35 spectrometer. Enantiomeric excesses (ee) were determined by GC analysis on an Agilent 7890A with a Varian CP-Chirasil-Dex CB capillary column or HPLC analysis on a Waters-Breeze (2487 Dual λ Absorbance Detector and 1525 Binary HPLC Pump). Chiralpak OD-H, OJ columns were purchased from Daicel Chemical Industries, LTD. Column chromatography was generally performed on silica gel (200-300 mesh) and TLC inspections were on silica gel GF<sub>254</sub> plates.

## 2. Materials:

NBS (N-bromosuccinimide), diacetoxyiodobenzene and potassium acetate were purchased from Aldrich and used as received. N-Bromophthalimide was purchased from Tokyo Chemical Industry Co. LTD and used as received. 1-(2,3-Difluorophenyl)ethanol, 1-(2,6-difluorophenyl)ethanol were prepared by reduction of ketone with NaBH<sub>4</sub> and then purified by silica gel column chromatography. (±)-1-(2-Fluorophenyl)ethanol, (±)-1-(4-trifluoromethylphenyl)ethanol were prepared from the corresponding aldehyde with CH<sub>3</sub>MgI and purified by column chromatography on silica gel. Others racemic secondary alcohols were purchased from Alfa Aesar, ACROS or Aldrich and used as received. Mn(III)-salen complex **1a** (Jacobsen catalyst) was purchased from ACROS and was used as received. Mn(III)-salen complexes **1b-1e** were prepared in accordance with literature procedures and were identified by HRMS.<sup>1</sup>

## 3. OKR procedure

### 3.1. General procedure for asymmetric oxidation with PhI(OAc)<sub>2</sub>:

The 5 ml round-bottom tube charged with ( $\pm$ )-1-(2-bromophenyl)ethanol (50 mg, 0.25 mmol), (*R,R*)-Mn-complex **1a** (1.6 mg, 0.0025 mmol) and KBr (2.38 mg, 0.020 mmol), then H<sub>2</sub>O (1.00 ml) and CH<sub>2</sub>Cl<sub>2</sub> (500  $\mu$ l) was added. The biphasic mixture was allowed to stir for five minutes before PhI(OAc)<sub>2</sub> (56.7 mg, 0.175 mmol) was added. After 4h, the reaction was quenched with saturated aqueous solution of Na<sub>2</sub>S<sub>2</sub>O<sub>3</sub>. The mixture was then extracted with Et<sub>2</sub>O (3 x 2 mL) and then combined the organic extracts. The conversion of the substrate was determined by GC measurement. Enantiomeric excess of the product was determined by GC analysis. The absolute configuration of the products was determined by comparison of literature procedures.

### 3.2. General OKR procedure with NBS:

The 5 ml round-bottom tube charged with secondary alcohol (0.25 mmol), (*R,R*)-Mn-complex **1b** (1.3 mg, 0.0025 mmol) and KOAc (19.6mg, 0.2 mmol), then H<sub>2</sub>O (1.00 mL) and CH<sub>2</sub>Cl<sub>2</sub> (500  $\mu$ L) was added. The biphasic mixture was allowed to stir for five minutes before NBS (28.9 mg, 0.1625 mmol) was added. After desired reaction time indicated in the tables 1-3, the mixture was then extracted with Et<sub>2</sub>O (3 x 2 ml) and then combined organic extracts. The conversion of the substrate was determined by GC measurement. Enantiomeric excess of the products was determined by GC analysis or HPLC analysis. The absolute configuration of the products was determined by comparison of literature procedures.

**Table 1 Conditions screen <sup>a</sup>**

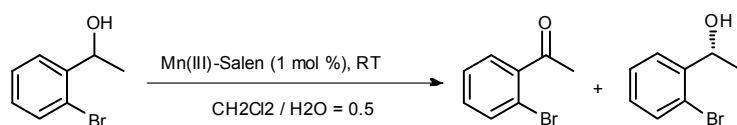

| entry | oxidant               | cat (1%)        | time  | Add         | Conv(%) <sup>b</sup> | ee(%) <sup>b</sup> | <i>k</i> <sub>rel</sub> <sup>d</sup> |
|-------|-----------------------|-----------------|-------|-------------|----------------------|--------------------|--------------------------------------|
| 1     | PhI(OAc) <sub>2</sub> | <b>1a</b>       | 4h    | KBr (8mol%) | <3                   | 0                  | -                                    |
| 2     | NBS                   | <b>1a</b>       | 40min | KOAc(0.8eq) | 40                   | 48                 | 10                                   |
| 3     | NBS                   | <b>1a</b>       | 4h    | KOAc(0.8eq) | 63                   | 94                 | 12                                   |
| 4     | NBS                   | <b>1b</b>       | 4h    | KOAc(0.8eq) | 64                   | 99                 | 17                                   |
| 5     | NBS                   | <b>1c(1%)</b>   | 4h    | KOAc(0.8eq) | 61                   | 85                 | 9                                    |
| 6     | NBS                   | <b>1d(1%)</b>   | 4h    | KOAc(0.8eq) | 64                   | 93                 | 10                                   |
| 7     | NBS                   | <b>1e(1%)</b>   | 4h    | KOAc(0.8eq) | 62                   | 91                 | 11                                   |
| 8     | NBS                   | <b>1b(0.5%)</b> | 4h    | KOAc(0.8eq) | 63                   | 93                 | 11                                   |
| 9     | NBS                   | <b>1b(2%)</b>   | 4h    | KOAc(0.8eq) | 64.8                 | 99                 | 16                                   |
| 10    | NBP <sup>e</sup>      | <b>1b(1%)</b>   | 4h    | KOAc(0.8eq) | 63.5                 | 95                 | 11                                   |
| 11    | NCS <sup>f</sup>      | <b>1b(1%)</b>   | 4h    | KOAc(0.8eq) | 14                   | 2                  | -                                    |
| 12    | NIS <sup>g</sup>      | <b>1b(1%)</b>   | 4h    | KOAc(0.8eq) | 26                   | 12                 | -                                    |

<sup>a</sup> Condition: 1.0 mol % of Mn(III)-salen complex, 0.25 mmol of (±)-1-(2-bromophenyl)ethanol, 1 mL of H<sub>2</sub>O, 0.5 mL of CH<sub>2</sub>Cl<sub>2</sub>, 0.163 mmol of NBS (0.65 equiv.), 0.2 mmol of KOAc (0.80 equiv.), RT for 4 h. <sup>b</sup> Determined by GC. <sup>c</sup> Determined by GC with a chiral column. <sup>d</sup>  $k_{rel} = \ln[(1 - conv)(1 - ee)] / \ln[(1 - conv)(1 + ee)]$  <sup>f</sup> 0.163 mmol of NBP (0.65 equiv.), NBP= N-Bromophthalimine. <sup>g</sup> 0.163 mmol of NCS (0.65 equiv.), NCS= N-Chlorosuccinimide. <sup>h</sup> 0.163 mmol of NIS (0.65 equiv.), NIS= N-Iodosuccinimide.

### 3.3. Asymmetric oxidation of alcohols

**(±)-1-(2-Bromophenyl)ethanol (1a):**<sup>2</sup> Conditions: (±)-1-(2-Bromophenyl)ethanol (50 mg, 0.25 mmol); (*R,R*)-Mn-complex **1b** (1.3 mg, 0.0025 mmol); KOAc (19.6mg, 0.2 mmol); H<sub>2</sub>O (1.00 mL) and CH<sub>2</sub>Cl<sub>2</sub> (500 μL); NBS (28.9 mg, 0.1625 mmol); room temperature; 4 h. GC (Varian Capillary Column CP-Chirasil-Dex CB): carrier gas, N<sub>2</sub> (flow 20 mL/min); injection temp, 250 °C; detector temperature, 280 °C; column temperature, 80 °C, hold 2 min, ramp 10 °C/min to 170 °C, then hold 10 min; major enantiomer  $t_R = 10.537$  min, minor enantiomer  $t_R = 11.048$  min; Conversion= 64%; ee= 99% of (*R*)-isomer. C<sub>8</sub>H<sub>9</sub>BrO: Calcd: 199.98, EI-MS found: 200.0. <sup>1</sup>H NMR (400 MHz, CDCl<sub>3</sub>) δ 7.57 (dd, *J* = 7.8, 1.7 Hz, 1H), 7.49 (dt, *J* = 11.4, 5.7 Hz, 1H), 7.39 – 7.27 (m, 1H), 7.12 (td, *J* = 7.7, 1.7 Hz, 1H), 5.22 (q, *J* = 6.4 Hz, 1H), 2.20 (s, 1H), 1.47 (d, *J* = 6.4 Hz, 3H). <sup>13</sup>C NMR (75 MHz, CDCl<sub>3</sub>) δ 144.64, 132.62, 128.76, 127.86, 126.68, 121.66, 69.14, 23.60.

**(±)-1-(2-Chlorophenyl)ethanol (1b):**<sup>2</sup> Conditions: (±)-1-(2-Chlorophenyl)ethanol (39 mg, 0.25 mmol); (*R,R*)-Mn-complex **1b** (1.3 mg, 0.0025 mmol); KOAc (19.6 mg, 0.2 mmol); H<sub>2</sub>O (1.00 mL) and CH<sub>2</sub>Cl<sub>2</sub> (500 μL); NBS (28.9 mg, 0.1625 mmol); room temperature; 4 h. GC (Varian Capillary Column CP-Chirasil-Dex CB): carrier gas, N<sub>2</sub> (flow 20 mL/min); injection temp, 250 °C; detector temperature, 280 °C; column temperature, 100 °C, hold 10 min, ramp 10 °C/min to 170 °C, then hold 10 min; major enantiomer  $t_R = 2.649$  min, minor enantiomer  $t_R = 3.109$  min; Conversion= 60%; ee= 93% of (*R*)-isomer. C<sub>8</sub>H<sub>9</sub>ClO: Calcd: 156.0, EI-MS found: 156.1. <sup>1</sup>H NMR (400 MHz, CDCl<sub>3</sub>) δ 7.58 (dd, *J* = 7.7, 1.6 Hz, 1H), 7.30 (ddd, *J* = 15.2, 7.8, 1.2 Hz, 2H), 7.19 (tt, *J* = 6.9, 3.4 Hz, 1H), 5.28 (q, *J* = 6.4 Hz, 1H), 2.15 (s, 1H), 1.48 (d, *J* = 6.4 Hz, 3H). <sup>13</sup>C NMR (75 MHz, CDCl<sub>3</sub>) δ 143.06, 131.59, 129.38, 128.40, 127.22, 126.40, 66.92, 23.51.

**(±)-1-(2-Fluorophenyl)ethanol (1c):**<sup>2</sup> Conditions: (±)-1-(2-Fluorophenyl)ethanol (35 mg, 0.25 mmol); (*R,R*)-Mn-complex **1b** (1.3 mg, 0.0025 mmol); KOAc (19.6mg, 0.2 mmol); H<sub>2</sub>O (1.00 mL) and CH<sub>2</sub>Cl<sub>2</sub> (500 μL); NBS (28.9 mg, 0.1625 mmol); room temperature; 4 h. GC (Varian Capillary Column CP-Chirasil-Dex CB): carrier gas, N<sub>2</sub> (flow 20 mL/min); injection temp, 250 °C; detector temperature, 280 °C; column temperature, 80 °C, hold 2 min, ramp 10 °C/min to 170 °C, then hold 10 min; major enantiomer  $t_R = 7.492$  min, minor enantiomer  $t_R = 7.758$  min; Conversion= 59%; ee= 94% of (*R*)-isomer. C<sub>8</sub>H<sub>9</sub>FO: Calcd: 140.1, EI-MS found: 140.1. <sup>1</sup>H NMR (400 MHz, CDCl<sub>3</sub>) δ 7.49 (t, *J* = 7.6 Hz, 1H), 7.23 (m, 1H), 7.14 (m, 1H), 7.07 – 6.92 (m, 1H), 5.19 (m, 1H), 2.18 (s, 1H), 1.55 – 1.42 (m, 3H). <sup>13</sup>C NMR (75 MHz, CDCl<sub>3</sub>) δ 159.66 (d, *J* = 245.2 Hz), 132.74 (d, *J* = 13.3 Hz), 128.69 (d, *J* = 8.3 Hz), 126.63 (d, *J* = 4.6 Hz), 124.28 (d, *J* = 3.5 Hz), 115.23 (d, *J* = 21.8 Hz), 64.36 (d, *J* = 3.1 Hz), 24.05 (s).

**(±)-1-(2-Methylphenyl)ethanol (2d):**<sup>2</sup> Conditions: (±)-1-(2'-Methylphenyl)ethanol (34 mg, 0.25 mmol); (*R,R*)-Mn-complex **1b** (1.3 mg, 0.0025 mmol); KOAc (19.6mg, 0.2 mmol); H<sub>2</sub>O (1.00 mL) and CH<sub>2</sub>Cl<sub>2</sub> (500 μL); NBS (28.9 mg, 0.1625 mmol); room temperature; 4 h. GC (Varian Capillary Column CP-Chirasil-Dex CB): carrier gas, N<sub>2</sub>

(flow 20 mL/min); injection temp, 250 °C; detector temperature, 280 °C; column temperature, 80 °C, hold 2 min, ramp 10 °C/min to 170 °C, then hold 10 min; major enantiomer  $t_R$  = 8.667 min, minor enantiomer  $t_R$  = 9.109 min; Conversion= 58%; ee= 94% of (*R*)-isomer.  $C_9H_{12}O$ : Calcd: 136.1, EI-MS found: 136.1.  $^1H$  NMR (400 MHz,  $CDCl_3$ )  $\delta$  7.51 (d,  $J$  = 7.6 Hz, 1H), 7.23 (d,  $J$  = 7.6 Hz, 1H), 7.19 – 7.09 (m, 2H), 5.13 (q,  $J$  = 6.4 Hz, 1H), 2.34 (s, 3H), 1.71 (s, 1H), 1.46 (d,  $J$  = 6.4 Hz, 3H).  $^{13}C$  NMR (75 MHz,  $CDCl_3$ )  $\delta$  143.84, 134.23, 130.37, 127.19, 126.40, 124.44, 66.81, 23.95, 18.95.

**(±)-1-(2-Methoxyphenyl)ethanol (2e):**<sup>2</sup> Conditions: (±)-1-Phenylethanol (38 mg, 0.25 mmol); (*R,R*)-Mn-complex **1b** (1.3 mg, 0.0025 mmol); KOAc (19.6mg, 0.2 mmol);  $H_2O$  (1.00 mL) and  $CH_2Cl_2$  (500  $\mu$ L); NBS (28.9 mg, 0.1625 mmol); room temperature; 4 h. GC (Varian Capillary Column CP-Chirasil-Dex CB): carrier gas,  $N_2$  (flow 20 mL/min); injection temp, 250 °C; detector temperature, 280 °C; column temperature, 80 °C, hold 2 min, ramp 10 °C/min to 170 °C, then hold 10 min; major enantiomer  $t_R$  = 20.137 min, minor enantiomer  $t_R$  = 20.474 min; Conversion= 58%; ee= 56% of (*R*)-isomer.  $C_9H_{12}O_2$ : Calcd: 152.1, EI-MS found: 152.1.  $^1H$  NMR (400 MHz,  $CDCl_3$ )  $\delta$  7.34 (dd,  $J$  = 7.5, 1.6 Hz, 1H), 7.28 – 7.21 (m, 1H), 6.96 (m, 1H), 6.88 (dd,  $J$  = 8.2, 0.7 Hz, 1H), 5.09 (q,  $J$  = 6.5 Hz, 1H), 3.86 (s, 3H), 1.50 (d,  $J$  = 6.5 Hz, 3H).  $^{13}C$  NMR (75 MHz,  $CDCl_3$ )  $\delta$  156.50, 133.40, 128.30, 126.09, 120.78, 110.38, 66.48, 55.25, 22.86.

**(±)-1-(2,3-Difluorophenyl)ethanol (2f):**<sup>2c</sup> Conditions: (±)-1-(2,3-Difluorophenyl) ethanol (39.5 mg, 0.25 mmol); (*R,R*)-Mn-complex **1b** (1.3 mg, 0.0025 mmol); KOAc (19.6 mg, 0.2 mmol);  $H_2O$  (1.00 mL) and  $CH_2Cl_2$  (500  $\mu$ L); NBS (28.9 mg, 0.1625 mmol); room temperature; 4 h. GC (Varian Capillary Column CP-Chirasil-Dex CB): carrier gas,  $N_2$  (flow 20 mL/min); injection temp, 250 °C; detector temperature, 280 °C; column temperature, 100 °C, hold 10 min, ramp 10 °C/min to 170 °C, then hold 10 min; minor enantiomer  $t_R$  = 7.805 min, major enantiomer  $t_R$  = 7.952 min; Conversion= 62%; ee= 99.4% of (*R*)-isomer. Colourless oil,  $C_8H_8F_2O$ : Calcd: 158.0, EI-MS found: 158.1.  $^1H$  NMR (400 MHz,  $CDCl_3$ ):  $\delta$  1.48 (d,  $J$  = 4.0 Hz, 3H), 2.51 (s, 1H), 5.18 (q,  $J$  = 8.0 Hz, 1H), 7.06 (m, 2H), 7.22 (m, 1H);  $^{13}C$  NMR (100 MHz,  $CDCl_3$ ):  $\delta$  150.3 (dd,  $J$  = 247.8, 12.9 Hz), 147.5 (dd,  $J$  = 247.1, 13.0 Hz), 135.1 (d,  $J$  = 10.3 Hz), 124.2 (dd,  $J$  = 6.8, 4.6 Hz), 121.2 (t,  $J$  = 3.4 Hz), 115.8 (d,  $J$  = 17.1 Hz), 64.1 (t,  $J$  = 2.9 Hz), 24.0 (s).

**(±)-1-(2,6-Difluorophenyl)ethanol (2g):**<sup>2a</sup> Conditions: (±)-1-(2,6-Difluorophenyl) ethanol (39.5 mg, 0.25 mmol); (*R,R*)-Mn-complex **1b** (1.3 mg, 0.0025 mmol); KOAc (19.6 mg, 0.2 mmol);  $H_2O$  (1.00 mL) and  $CH_2Cl_2$  (500  $\mu$ L); NBS (28.9 mg, 0.1625 mmol); room temperature; 4 h. GC (Varian Capillary Column CP-Chirasil-Dex CB): carrier gas,  $N_2$  (flow 20 mL/min); injection temp, 250 °C; detector temperature, 280 °C; column temperature, 100 °C, hold 10 min, ramp 10 °C/min to 170 °C, then hold 10 min; minor enantiomer  $t_R$  = 6.782 min, major enantiomer  $t_R$  = 6.562 min; Conversion= 56%; ee= 95% of (*R*)-isomer. Colourless oil,  $C_8H_8F_2O$ : Calcd: 158.0, EI-MS found: 158.1.  $^1H$  NMR (400 MHz,  $CDCl_3$ ):  $\delta$  7.19 (tt,  $J$  = 8.4, 6.4 Hz, 1H), 6.93 – 6.78 (m, 2H), 5.24 (q,  $J$  = 6.5 Hz, 1H), 2.55 (s, 1H), 1.61 (d,  $J$  = 6.8 Hz, 3H);  $^{13}C$  NMR (100 MHz,  $CDCl_3$ )  $\delta$  160.8 (dd,  $J$  = 247.6, 8.8 Hz), 128.9 (t,  $J$  = 10.7 Hz), 120.5 (t,  $J$  = 16.6 Hz), 112.5 – 110.7 (m), 62.3 (t,  $J$  = 3.3 Hz), 23.3 (s).

**(±)-1-(3-Methylphenyl)ethanol (2h):** Conditions: (±)-1-(3-Methylphenyl)ethanol (34 mg, 0.25 mmol); (*R,R*)-Mn-complex **1b** (1.3 mg, 0.0025 mmol); KOAc (19.6 mg, 0.2 mmol);  $H_2O$  (1.00 mL) and  $CH_2Cl_2$  (500  $\mu$ L);

NBS (28.9 mg, 0.1625 mmol); room temperature; 20 min. GC (Varian Capillary Column CP-Chirasil-Dex CB): carrier gas, N<sub>2</sub> (flow 20 mL/min); injection temp, 250 °C; detector temperature, 280 °C; column temperature, 100 °C, hold 10 min, ramp 10 °C/min to 170 °C, then hold 10 min; major enantiomer  $t_R$  = 8.222 min, minor enantiomer  $t_R$  = 8.430 min; Conversion = 63%; ee = 98.7 % of (*R*)-isomer. C<sub>9</sub>H<sub>12</sub>O: Calcd: 136.1, EI-MS found: 136.1. <sup>1</sup>H NMR (400 MHz, CDCl<sub>3</sub>) δ 7.23 (t,  $J$  = 5.9 Hz, 1H), 7.20 – 7.13 (m, 2H), 7.08 (d,  $J$  = 7.4 Hz, 1H), 2.36 (s, 3H), 1.92 (s, 1H), 1.48 (d,  $J$  = 6.5 Hz, 3H). <sup>13</sup>C NMR (75 MHz, CDCl<sub>3</sub>) δ 145.81, 138.16, 128.42, 128.21, 126.13, 122.45, 70.41, 25.14, 21.50.

**(±)-1-(3-Fluorophenyl)ethanol (2i):** Conditions: (±)-1-(3-Fluorophenyl)ethanol (35 mg, 0.25 mmol); (*R,R*)-Mn-complex **1b** (1.3 mg, 0.0025 mmol); KOAc (19.6 mg, 0.2 mmol); H<sub>2</sub>O (1.00 mL) and CH<sub>2</sub>Cl<sub>2</sub> (500 μL); NBS (28.9 mg, 0.1625 mmol); room temperature; 20 min. GC (Varian Capillary Column CP-Chirasil-Dex CB): carrier gas, N<sub>2</sub> (flow 20 mL/min); injection temp, 250 °C; detector temperature, 280 °C; column temperature, 100 °C, hold 10 min, ramp 10 °C/min to 170 °C, then hold 10 min; major enantiomer  $t_R$  = 7.693 min, minor enantiomer  $t_R$  = 8.026 min; Conversion = 62%; ee = 98.6% of (*R*)-isomer. C<sub>8</sub>H<sub>9</sub>FO: Calcd: 140.1, EI-MS found: 140.1. <sup>1</sup>H NMR (400 MHz, CDCl<sub>3</sub>) δ 7.29 (m, 1H), 7.09 (dd,  $J$  = 12.1, 9.3 Hz, 2H), 6.94 (m, 1H), 4.87 (q,  $J$  = 6.4 Hz, 1H), 2.16 (s, 1H), 1.46 (dd,  $J$  = 6.5, 0.6 Hz, 3H). <sup>13</sup>C NMR (75 MHz, CDCl<sub>3</sub>) δ 162.95 (d,  $J$  = 245.7 Hz), 148.53 (d,  $J$  = 6.6 Hz), 129.97 (d,  $J$  = 8.2 Hz), 120.96 (d,  $J$  = 2.8 Hz), 114.17 (d,  $J$  = 21.2 Hz), 112.30 (d,  $J$  = 21.8 Hz), 69.71 (d,  $J$  = 1.7 Hz), 25.19 (s).

**(±)-1-phenylethanol (2j):**<sup>2</sup> Conditions: (±)-1-Phenylethanol (30.5 mg, 0.25 mmol); (*R,R*)-Mn-complex **1b** (1.3 mg, 0.0025 mmol); KOAc (19.6 mg, 0.2 mmol); H<sub>2</sub>O (1.00 mL) and CH<sub>2</sub>Cl<sub>2</sub> (500 μL); NBS (28.9 mg, 0.1625 mmol); room temperature; 20 min. GC (Varian Capillary Column CP-Chirasil-Dex CB): carrier gas, N<sub>2</sub> (flow 20 mL/min); injection temp, 250 °C; detector temperature, 280 °C; column temperature, 80 °C, hold 2 min, ramp 10 °C/min to 170 °C, then hold 10 min; major enantiomer  $t_R$  = 7.265 min, minor enantiomer  $t_R$  = 7.569 min; Conversion = 63%; ee = 97% of (*R*)-isomer. C<sub>8</sub>H<sub>10</sub>O: Calcd: 122.0, EI-MS found: 122.1. <sup>1</sup>H NMR (400 MHz, CDCl<sub>3</sub>) δ 7.39 – 7.31 (m, 4H), 7.29 – 7.23 (m, 1H), 4.95 – 4.79 (m, 1H), 2.08 (d,  $J$  = 54.4 Hz, 1H), 1.53 – 1.41 (m, 3H). <sup>13</sup>C NMR (75 MHz, CDCl<sub>3</sub>) δ 145.85, 128.50, 127.45, 125.43, 70.35, 25.18.

**(±)-1-(4-Fluorophenyl)ethanol (2k):**<sup>2</sup> Conditions: (±)-1-(4-Fluorophenyl)ethanol (35 mg, 0.25 mmol); (*R,R*)-Mn-complex **1b** (1.3 mg, 0.0025 mmol); KOAc (19.6 mg, 0.2 mmol); H<sub>2</sub>O (1.00 mL) and CH<sub>2</sub>Cl<sub>2</sub> (500 μL); NBS (28.9 mg, 0.1625 mmol); room temperature; 20 min. GC (Varian Capillary Column CP-Chirasil-Dex CB): carrier gas, N<sub>2</sub> (flow 20 mL/min); injection temp, 250 °C; detector temperature, 280 °C; column temperature, 100 °C, hold 10 min, ramp 10 °C/min to 170 °C, then hold 10 min; major enantiomer  $t_R$  = 7.588 min, minor enantiomer  $t_R$  = 7.986 min; Conversion = 63%; ee = 97.5% of (*R*)-isomer. C<sub>8</sub>H<sub>9</sub>FO: Calcd: 140.1, EI-MS found: 140.1. <sup>1</sup>H NMR (400 MHz, CDCl<sub>3</sub>) δ 7.34 – 7.28 (m, 2H), 7.05 – 6.97 (m, 2H), 4.85 (q,  $J$  = 6.4 Hz, 1H), 2.19 (s, 1H), 1.45 (d,  $J$  = 6.5 Hz, 3H). <sup>13</sup>C NMR (75 MHz, CDCl<sub>3</sub>) δ 162.06 (d,  $J$  = 245.0 Hz), 141.51 (d,  $J$  = 3.1 Hz), 127.05 (d,  $J$  = 8.1 Hz), 115.23 (d,  $J$  = 21.3 Hz), 69.71 (s), 25.27 (s).

**(±)-1-(4-Methylphenyl)ethanol (2l):**<sup>2</sup> Conditions: (±)-1-(4-Methylphenyl)ethanol (34 mg, 0.25 mmol); (*R,R*)-Mn-complex **1b** (1.3 mg, 0.0025 mmol); KOAc (19.6 mg, 0.2 mmol); H<sub>2</sub>O (1.00 mL) and CH<sub>2</sub>Cl<sub>2</sub> (500 μL); NBS (28.9 mg, 0.1625 mmol); room temperature; 20 min. GC (Varian Capillary Column CP-Chirasil-Dex CB): carrier

gas, N<sub>2</sub> (flow 20 mL/min); injection temp, 250 °C; detector temperature, 280 °C; column temperature, 100 °C, hold 10 min, ramp 10 °C/min to 170 °C, then hold 10 min; major enantiomer  $t_R$  = 8.982 min, minor enantiomer  $t_R$  = 8.309 min; Conversion = 62%; ee = 94.5% of (*R*)-isomer. C<sub>9</sub>H<sub>12</sub>O: Calcd: 136.1, EI-MS found: 136.1. <sup>1</sup>H NMR (400 MHz, CDCl<sub>3</sub>) δ 7.25 (d, *J* = 8.0 Hz, 2H), 7.15 (d, *J* = 7.9 Hz, 2H), 4.83 (q, *J* = 6.4 Hz, 1H), 2.33 (s, 3H), 2.02 (s, 1H), 1.46 (d, *J* = 6.5 Hz, 3H). <sup>13</sup>C NMR (75 MHz, CDCl<sub>3</sub>) δ 142.93, 137.10, 129.16, 125.40, 70.19, 25.12, 21.14.

**(±)-1-(4-Trifluoromethylphenyl)ethanol (2m)**:<sup>2</sup> Conditions: (±)-1-(4-Trifluoromethylphenyl)ethanol (47.5 mg, 0.25 mmol); (*R,R*)-Mn-complex **1b** (1.3 mg, 0.0025 mmol); KOAc (19.6 mg, 0.2 mmol); H<sub>2</sub>O (1.00 mL) and CH<sub>2</sub>Cl<sub>2</sub> (500 μL); NBS (28.9 mg, 0.1625 mmol); room temperature; 20 min. GC (Varian Capillary Column CP-Chirasil-Dex CB): carrier gas, N<sub>2</sub> (flow 20 mL/min); injection temp, 250 °C; detector temperature, 280 °C; column temperature, 130 °C, hold 4 min, ramp 5 °C/min to 170 °C, then hold 10 min; major enantiomer  $t_R$  = 3.526 min, minor enantiomer  $t_R$  = 4.093 min; Conversion = 60%; ee = 94 % of (*R*)-isomer. C<sub>9</sub>H<sub>9</sub>F<sub>3</sub>O: Calcd: 190.1, EI-MS found: 190.1. <sup>1</sup>H NMR (400 MHz, CDCl<sub>3</sub>) δ 7.61 (d, *J* = 8.1 Hz, 2H), 7.49 (d, *J* = 8.4 Hz, 2H), 4.97 (q, *J* = 6.5 Hz, 1H), 1.91 (s, 1H), 1.51 (d, *J* = 6.5 Hz, 3H). <sup>13</sup>C NMR (75 MHz, CDCl<sub>3</sub>) δ 149.68 (s), 125.95 (s), 125.64 (s), 125.48 (s), 125.43 (s), 69.84 (s), 25.43 (s).

**(±)-1-(4-Chlorophenyl)ethanol (2n)**:<sup>2</sup> Conditions: (±)-1-(4-Chlorophenyl)ethanol (39 mg, 0.25 mmol); (*R,R*)-Mn-complex **1b** (1.3 mg, 0.0025 mmol); KOAc (19.6 mg, 0.2 mmol); H<sub>2</sub>O (1.00 mL) and CH<sub>2</sub>Cl<sub>2</sub> (500 μL); NBS (28.9 mg, 0.1625 mmol); room temperature; 20 min. GC (Varian Capillary Column CP-Chirasil-Dex CB): carrier gas, N<sub>2</sub> (flow 20 mL/min); injection temp, 250 °C; detector temperature, 280 °C; column temperature, 100 °C, hold 10 min, ramp 10 °C/min to 170 °C, then hold 10 min; major enantiomer  $t_R$  = 9.756 min, minor enantiomer  $t_R$  = 10.038 min; Conversion = 61%; ee = 94% of (*R*)-isomer. C<sub>8</sub>H<sub>9</sub>ClO: Calcd: 156.0, EI-MS found: 156.1. <sup>1</sup>H NMR (400 MHz, CDCl<sub>3</sub>) δ 7.32 – 7.26 (m, 4H), 4.85 (q, *J* = 6.5 Hz, 1H), 2.13 (s, 1H), 1.45 (d, *J* = 6.5 Hz, 3H). <sup>13</sup>C NMR (75 MHz, CDCl<sub>3</sub>) δ 144.26, 132.98, 128.56, 126.82, 69.65, 25.25.

**(±)-1-Indanol (2o)**:<sup>2c</sup> Conditions: (±)-1-indanol (33.5 mg, 0.25 mmol); (*R,R*)-Mn-complex **1b** (1.3 mg, 0.0025 mmol); KOAc (19.6 mg, 0.2 mmol); H<sub>2</sub>O (1.00 mL) and CH<sub>2</sub>Cl<sub>2</sub> (500 μL); NBS (28.9 mg, 0.1625 mmol); room temperature; 2 h. Conversion was determined GC (Varian Capillary Column CP-Chirasil-Dex CB): carrier gas, N<sub>2</sub> (flow 20 mL/min); injection temp, 250 °C; detector temperature, 280 °C; column temperature, 100 °C, hold 10 min, ramp 10 °C/min to 170 °C, then hold 10 min; Enantiomeric excess was determined by HPLC with a Chiralcel OD-H column (hexane: isopropanol = 90:10, 0.8 mL/min, 254 nm); major enantiomer  $t_R$  = 13.917 min, minor enantiomer  $t_R$  = 13.530 min; Conversion = 61%; ee = 99.9% of (*R*)-isomer. C<sub>9</sub>H<sub>10</sub>O: Calcd: 134.1, EI-MS found: 134.1. <sup>1</sup>H NMR (400 MHz, CDCl<sub>3</sub>) δ 7.37 (d, *J* = 6.8 Hz, 1H), 7.25 – 7.16 (m, 3H), 5.17 (d, *J* = 5.2 Hz, 1H), 3.07 – 2.92 (m, 1H), 2.85 – 2.69 (m, 1H), 2.49 – 2.36 (m, 1H), 1.97 – 1.78 (m, 1H). <sup>13</sup>C NMR (75 MHz, CDCl<sub>3</sub>) δ 145.06, 143.32, 128.22, 126.67, 124.87, 124.33, 76.19, 35.77, 29.82.

**(±)-6,7,8,9-tetrahydro-5*H*-benzocyclohepten-5-ol (2p)**:<sup>2</sup> Conditions: (±)-6,7,8,9-tetrahydro-5*H*-benzocyclohepten-5-ol (40.5 mg, 0.25 mmol); (*R,R*)-Mn-complex **1b** (1.3 mg, 0.0025 mmol); KOAc (19.6 mg, 0.2 mmol); H<sub>2</sub>O (1.00 mL) and CH<sub>2</sub>Cl<sub>2</sub> (500 μL); NBS (28.9 mg, 0.1625 mmol); room temperature; 2 h. GC (Varian Capillary Column CP-Chirasil-Dex CB): carrier gas, N<sub>2</sub> (flow 20 mL/min); injection temp, 250 °C; detector temperature, 280 °C; column temperature, 100 °C, hold 10 min, ramp 10 °C/min to 170 °C, then hold 10 min; major enantiomer  $t_R$  = 11.704 min, minor enantiomer  $t_R$  = 12.416 min; Conversion = 55%; ee = 94% of (*R*)-isomer.

$C_{11}H_{14}O$ : Calcd: 162.1, EI-MS found: 162.0.  $^1H$  NMR (400 MHz,  $CDCl_3$ )  $\delta$  7.43 (d,  $J = 7.4$  Hz, 1H), 7.20 (td,  $J = 7.4$ , 1.5 Hz, 1H), 7.15 (td,  $J = 7.3$ , 1.5 Hz, 1H), 7.09 (dd,  $J = 7.3$ , 1.1 Hz, 1H), 4.92 (d,  $J = 7.5$  Hz, 1H), 2.91 (dd,  $J = 14.0$ , 8.4 Hz, 1H), 2.70 (ddd,  $J = 14.1$ , 10.6, 1.3 Hz, 1H), 2.11 – 1.99 (m, 1H), 1.95 (dd,  $J = 8.8$ , 7.5 Hz, 2H), 1.86 – 1.69 (m, 3H), 1.56 – 1.36 (m, 1H).  $^{13}C$  NMR (75 MHz,  $CDCl_3$ )  $\delta$  144.29, 140.81, 129.51, 126.99, 126.12, 124.55, 73.98, 36.58, 35.75, 27.86, 27.60.

**(±)-Menthol (2q)**:<sup>2c</sup> Conditions: (±)-Menthol (39 mg, 0.25 mmol); (*R,R*)-Mn-complex **1b** (1.3 mg, 0.0025 mmol); KOAc (19.6 mg, 0.2 mmol);  $H_2O$  (1.00 mL) and  $CH_2Cl_2$  (500  $\mu$ L); NBS (28.9 mg, 0.1625 mmol); room temperature; 2 h. GC (Varian Capillary Column CP-Chirasil-Dex CB): carrier gas,  $N_2$  (flow 20 mL/min); injection temp, 250 °C; detector temperature, 280 °C; column temperature, 100 °C, hold 10 min, ramp 10 °C/min to 170 °C, then hold 10 min; major enantiomer  $t_R = 16.217$  min, minor enantiomer  $t_R = 15.965$  min; Conversion = 64%; ee = 98.7% of (*S*)-isomer.  $C_{10}H_{20}O$ : Calcd: 156.1, EI-MS found: 156.0.  $^1H$  NMR (400 MHz,  $CDCl_3$ ) 3.41 (m, 1H), 2.25 – 2.09 (m, 1H), 1.96 (dd,  $J = 9.3$ , 2.7 Hz, 1H), 1.63 (ddd,  $J = 12.9$ , 11.5, 2.4 Hz, 2H), 1.52 – 1.35 (m, 2H), 1.32 – 1.18 (m, 1H), 1.16 – 1.04 (m, 1H), 0.98 (m, 1H), 0.94 (m, 1H), 0.91 (tt,  $J = 8.4$ , 3.3 Hz, 6H), 0.84 – 0.75 (m, 3H).  $^{13}C$  NMR (75 MHz,  $CDCl_3$ )  $\delta$  71.48, 50.06, 44.98, 34.51, 31.62, 25.74, 23.03, 22.24, 21.04, 16.02.

**(±)-1,1-Diphenyl-2-propanol (2r)**:<sup>2c</sup> Conditions: (±)-1,1-Diphenyl-2-propanol (53 mg, 0.25 mmol); (*R,R*)-Mn-complex **1b** (1.3 mg, 0.0025 mmol); KOAc (19.6 mg, 0.2 mmol);  $H_2O$  (1.00 mL) and  $CH_2Cl_2$  (500  $\mu$ L); NBS (28.9 mg, 0.1625 mmol); room temperature; 2 h. Conversion was determined GC (Varian Capillary Column CP-Chirasil-Dex CB): carrier gas,  $N_2$  (flow 20 mL/min); injection temp, 250 °C; detector temperature, 280 °C; column temperature, 100 °C, hold 10 min, rap 10 °C/min to 170 °C, then hold 10 min; Enantiomeric excess was determined by HPLC with a Chiralcel OJ column (hexane: isopropanol = 75:25, 1 mL/min, 254 nm); major enantiomer  $t_R = 50.581$  min, minor enantiomer  $t_R = 40.608$  min; Conversion = 59%; ee = 99.9% of (*R*)-isomer.  $C_{15}H_{16}O$ : Calcd: 212.1, EI-MS found: 212.1.  $^1H$  NMR (400 MHz,  $CDCl_3$ )  $\delta$  7.39 (d,  $J = 7.9$  Hz, 2H), 7.33 (t,  $J = 7.5$  Hz, 2H), 7.30 – 7.26 (m, 4H), 7.24 (dd,  $J = 6.9$ , 5.2 Hz, 1H), 7.21 – 7.15 (m, 1H), 4.55 (dq,  $J = 8.7$ , 6.1 Hz, 1H), 3.81 (d,  $J = 8.8$  Hz, 1H), 1.68 (s, 1H), 1.20 (dd,  $J = 6.1$ , 0.8 Hz, 3H).  $^{13}C$  NMR (75 MHz,  $CDCl_3$ )  $\delta$  142.51, 141.54, 128.93, 128.66, 128.20, 126.96, 126.60, 70.08, 60.64, 21.43.

**(±)-1-(2-Naphthyl)ethanol (2s)**:<sup>2c</sup> Conditions: (±)-1-(2'-Naphthyl)ethanol (43 mg, 0.25 mmol); (*R,R*)-Mn-complex **1b** (1.3 mg, 0.0025 mmol); KOAc (19.6 mg, 0.2 mmol);  $H_2O$  (1.00 mL) and  $CH_2Cl_2$  (500  $\mu$ L); NBS (28.9 mg, 0.1625 mmol); room temperature; 2 h. Conversion was determined GC (Varian Capillary Column CP-Chirasil-Dex CB): carrier gas,  $N_2$  (flow 20 mL/min); injection temp, 250 °C; detector temperature, 280 °C; column temperature, 100 °C, hold 10 min, ramp 10 °C/min to 170 °C, then hold 10 min; Enantiomeric excess was determined by HPLC with a Chiralcel OD-H column (hexane: isopropanol = 90:10, 1 mL/min, 254 nm) major enantiomer  $t_R = 14.530$  min, minor enantiomer  $t_R = 13.917$  min; Conversion = 58%; ee = 99.8% of (*R*)-isomer.  $C_{12}H_{12}O$ : Calcd: 172.1, EI-MS found: 172.1.  $^1H$  NMR (400 MHz,  $CDCl_3$ )  $\delta$  7.94 – 7.70 (m, 4H), 7.62 – 7.38 (m, 3H), 5.06 (q,  $J = 6.4$  Hz, 1H), 1.78 (s, 1H), 1.58 (d,  $J = 6.5$  Hz, 3H).  $^{13}C$  NMR (75 MHz,  $CDCl_3$ )  $\delta$  143.20, 133.29, 132.89, 128.33, 127.95, 127.69, 126.17, 125.82, 123.84, 123.81, 70.53, 25.17.

**(±)-1-phenyl-2-propanol (2t)**:<sup>2d</sup> Conditions: (±)-1-phenyl-2-propanol (31.5 mg, 0.25 mmol); (*R,R*)-Mn-complex **1b** (1.3 mg, 0.0025 mmol); KOAc (19.6 mg, 0.2 mmol);  $H_2O$  (1.00 mL) and  $CH_2Cl_2$  (500  $\mu$ L); NBS (28.9 mg, 0.1625

mmol); room temperature; 2 h. GC (Varian Capillary Column CP-Chirasil-Dex CB): carrier gas, N<sub>2</sub> (flow 20 mL/min); injection temp, 250 °C; detector temperature, 280 °C; column temperature, 100 °C, hold 5 min, ramp 5 °C/min to 170 °C, then hold 10 min; major enantiomer  $t_R$  = 9.065 min, minor enantiomer  $t_R$  = 8.919 min; Conversion = 64%; ee = 98% of (*R*)-isomer. C<sub>8</sub>H<sub>12</sub>O: Calcd: 136.1, EI-MS found: 136.1. <sup>1</sup>H NMR (400 MHz, CDCl<sub>3</sub>) δ 7.33 – 7.25 (m, 2H), 7.24 – 7.14 (m, 3H), 4.05 – 3.89 (m, 1H), 2.71 (qd,  $J$  = 13.4, 6.4 Hz, 2H), 1.83 (s, 1H), 1.21 (d,  $J$  = 6.2 Hz, 3H). <sup>13</sup>C NMR (75 MHz, CDCl<sub>3</sub>) δ 138.61, 129.46, 128.56, 126.49, 68.90, 45.80, 22.79.

**(±)-3,3dimethyl-2-propanol (2u)**:<sup>2c</sup> Conditions: (±)-3,3dimethyl-2-propanol (25.5 mg, 0.25 mmol); (*R,R*)-Mn-complex **1b** (1.3 mg, 0.0025 mmol); KOAc (19.6 mg, 0.2 mmol); H<sub>2</sub>O (1.00 mL) and CH<sub>2</sub>Cl<sub>2</sub> (500 μL); NBS (28.9 mg, 0.1625 mmol); room temperature; 20min. GC (Varian Capillary Column CP-Chirasil-Dex CB): carrier gas, N<sub>2</sub> (flow 20 mL/min); injection temp, 250 °C; detector temperature, 280 °C; column temperature, 50 °C, hold 2 min, ramp 4 °C/min to 170 °C, then hold 10 min; major enantiomer  $t_R$  = 7.656 min, minor enantiomer  $t_R$  = 7.944 min; Conversion = 63%; ee = 86% of (*R*)-isomer. C<sub>6</sub>H<sub>14</sub>O: Calcd: 102.1, EI-MS found: 102.1. <sup>1</sup>H NMR (400 MHz, CDCl<sub>3</sub>) δ 3.48 (q,  $J$  = 6.4 Hz, 1H), 1.45 (s, 1H), 1.12 (d,  $J$  = 6.4 Hz, 3H), 0.89 (s, 9H). <sup>13</sup>C NMR (75 MHz, CDCl<sub>3</sub>) δ 75.65, 34.89, 25.40, 17.86.

**(±)-1-cyclopropylethanol (2v)**:<sup>2c</sup> Conditions: (±)-1-cyclopropylethanol (21.5 mg, 0.25 mmol); (*R,R*)-Mn-complex **1b** (1.3 mg, 0.0025 mmol); KOAc (19.6 mg, 0.2 mmol); H<sub>2</sub>O (1.00 mL) and CH<sub>2</sub>Cl<sub>2</sub> (500 μL); NBS (28.9 mg, 0.1625 mmol); room temperature; 20min. GC (Varian Capillary Column CP-Chirasil-Dex CB): carrier gas, N<sub>2</sub> (flow 20 mL/min); injection temp, 250 °C; detector temperature, 280 °C; column temperature, 50 °C, hold 2 min, ramp 4 °C/min to 170 °C, then hold 10 min; major enantiomer  $t_R$  = 5.798 min, minor enantiomer  $t_R$  = 6.013 min; Conversion = 62%; ee = 67% of (*R*)-isomer. C<sub>5</sub>H<sub>10</sub>O: Calcd: 86.0, EI-MS found: 86.1. <sup>1</sup>H NMR (400 MHz, CDCl<sub>3</sub>) δ 3.05 (dq,  $J$  = 8.3, 6.2 Hz, 1H), 1.85 (s, 1H), 1.25 (d,  $J$  = 6.2 Hz, 3H), 0.88 (m, 1H), 0.54 – 0.40 (m, 2H), 0.30 – 0.21 (m, 1H), 0.19 – 0.09 (m, 1H). <sup>13</sup>C NMR (75 MHz, CDCl<sub>3</sub>) 72.98, 22.39, 19.16, 3.01, 2.21.

#### 3.4. Studies of the reaction between NBS and water.



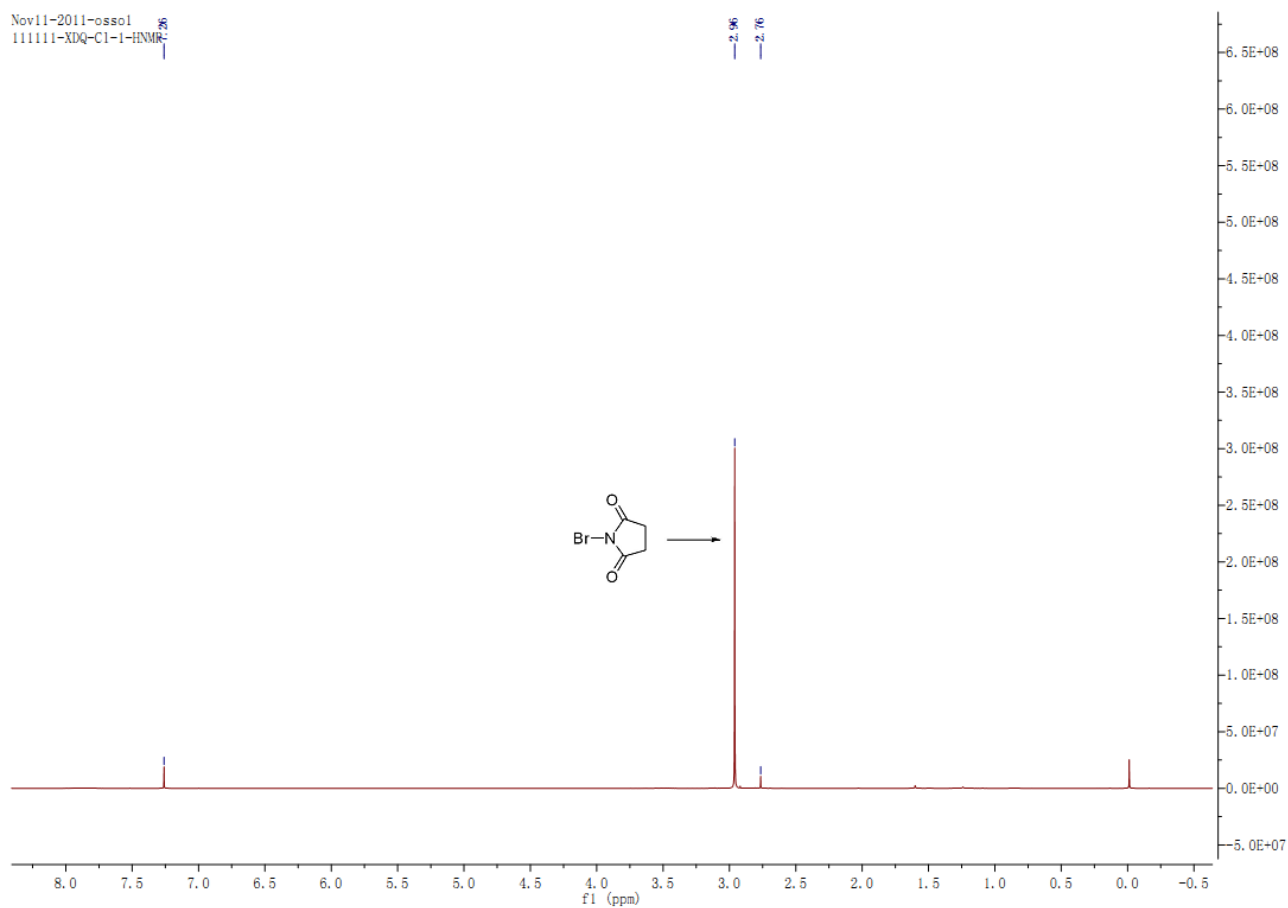

Figure S1.  $^1\text{H}$  NMR of NBS in  $\text{CDCl}_3$

Nov11-2011-ossol  
1111111-1DQ-C-1-HNMR

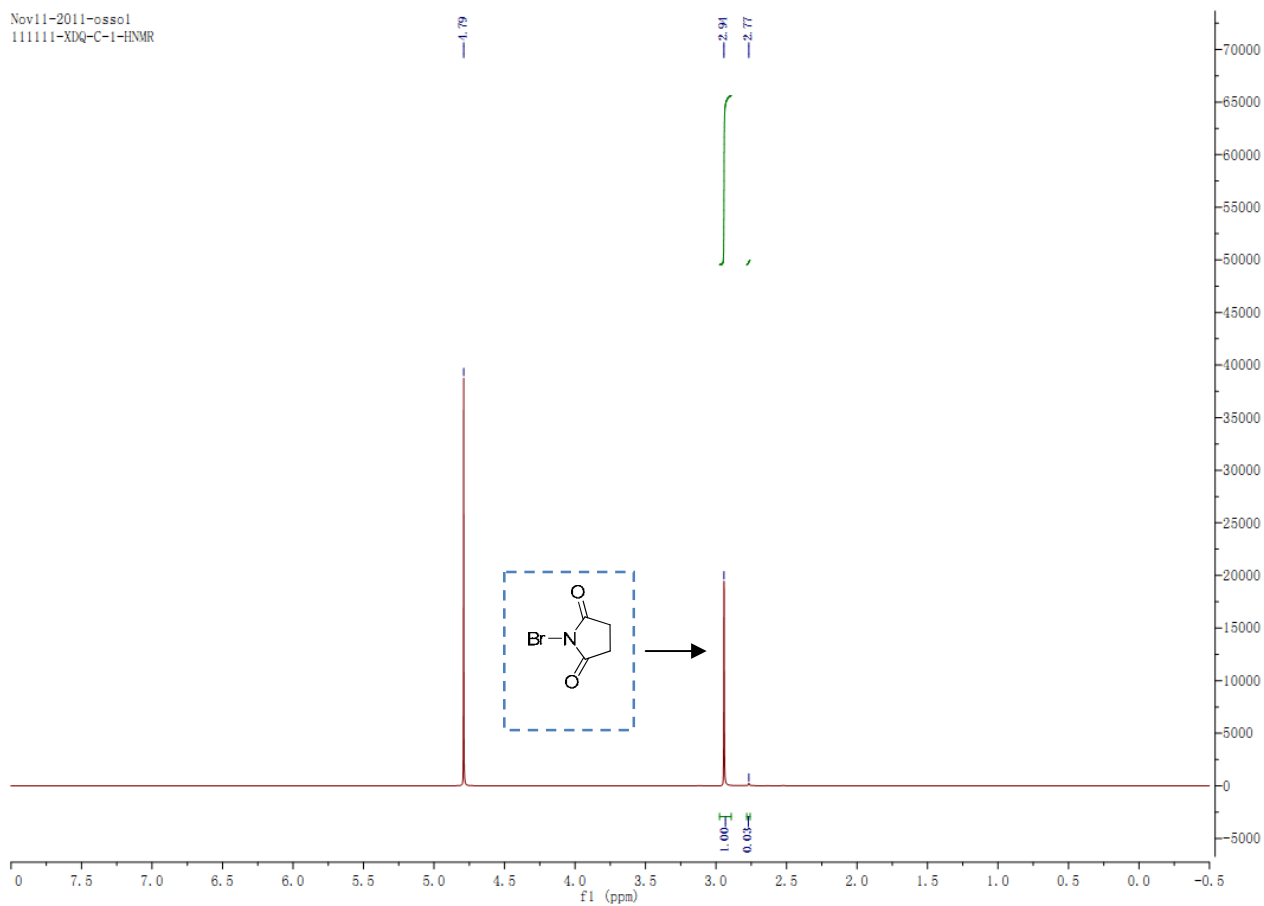

Figure S2.  $^1\text{H}$  NMR of NBS in  $\text{D}_2\text{O}$

Nov11-2011-ossol  
1111111-XDQ-D-2-HNMR

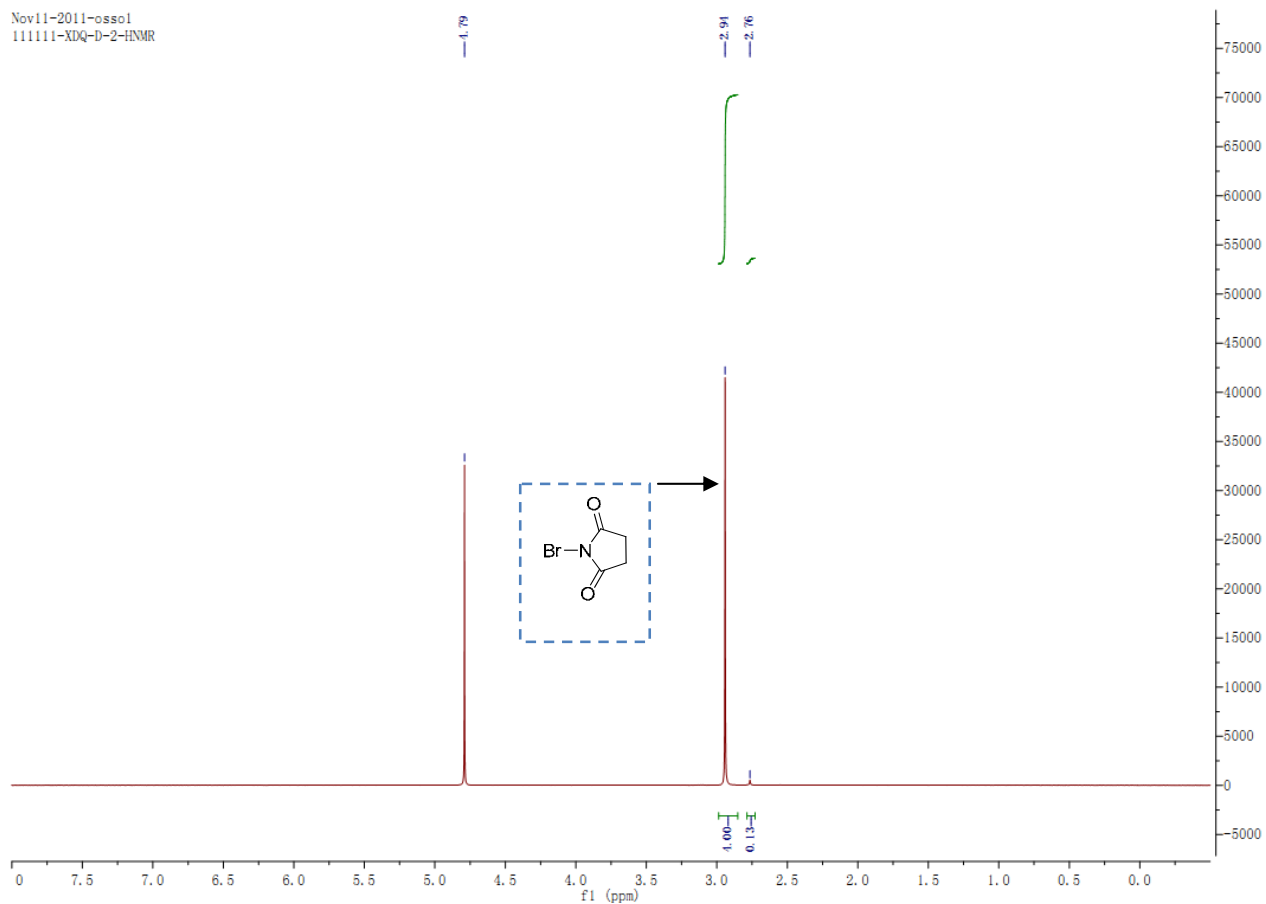

Figure S3.  $^1\text{H}$  NMR of NBS in  $\text{D}_2\text{O}$  after 1 h.

Nov11-2011-0ssol  
111111-XDQ-D-3-HNMR

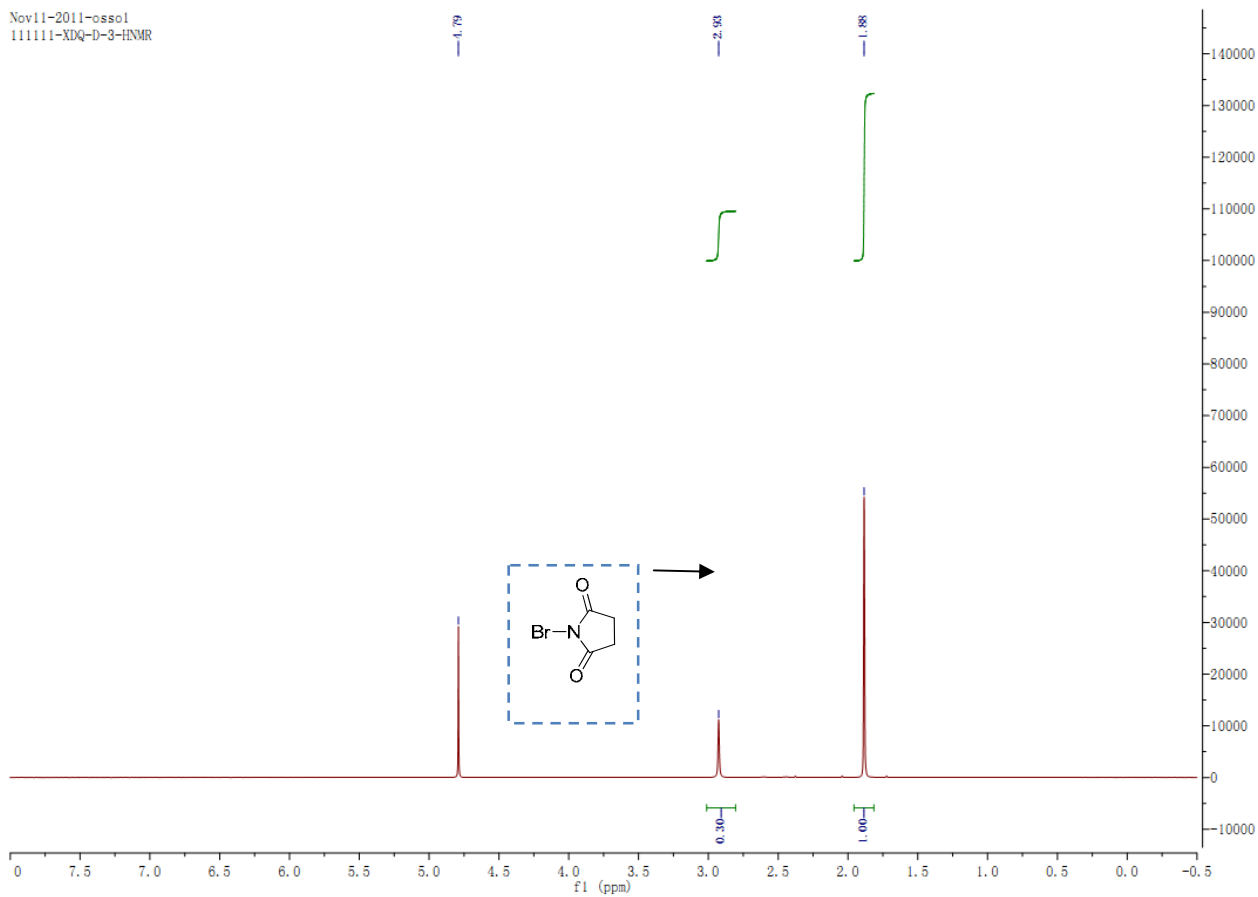

Figure S4.  $^1\text{H}$  NMR of NBS in  $\text{D}_2\text{O}$  in the presence of KOAc.

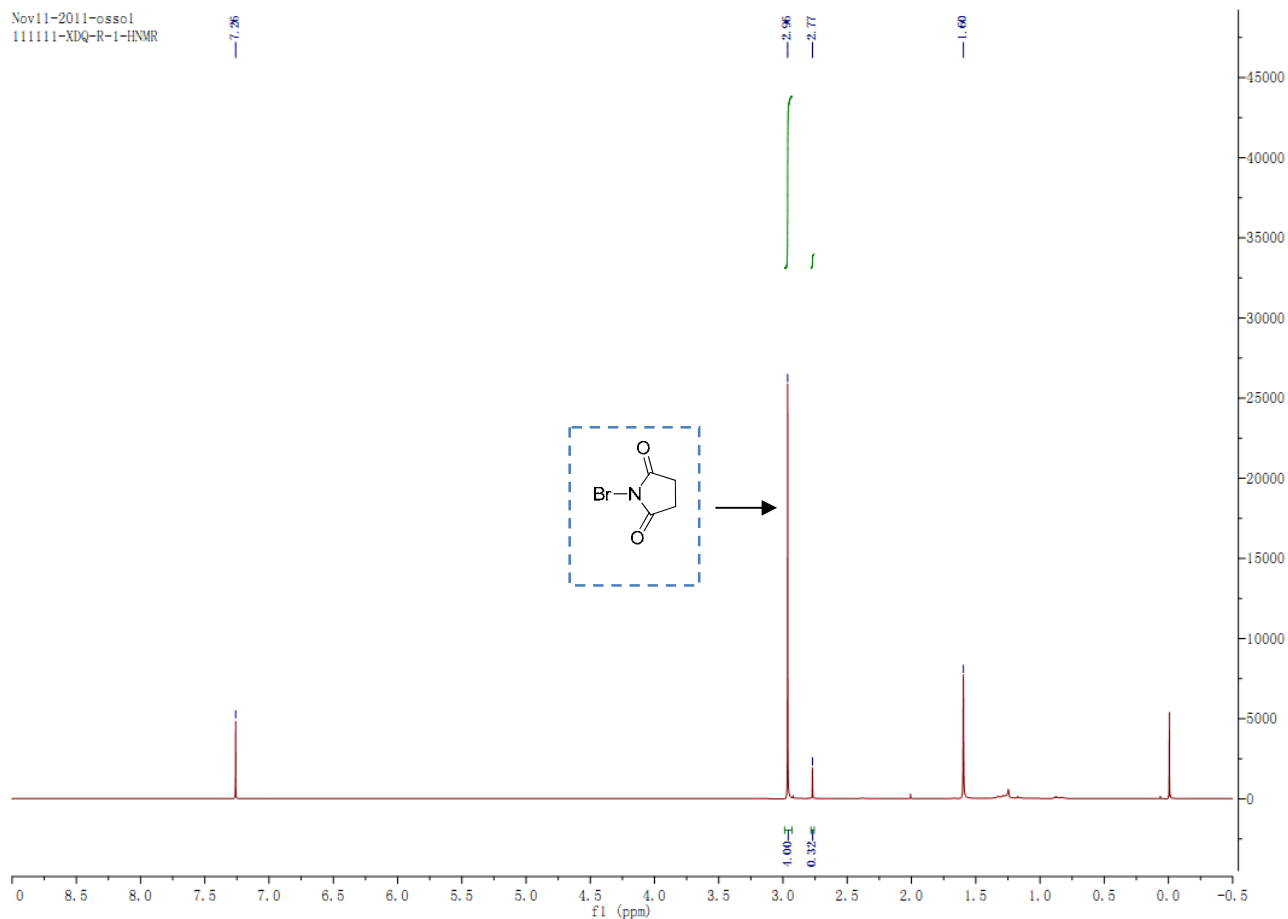

Figure S5.  $^1\text{H}$  NMR in  $\text{CDCl}_3$  (NBS was stirred in water in the presence of KOAc for 1 h, then the mixture was extracted with  $\text{CDCl}_3$ ).

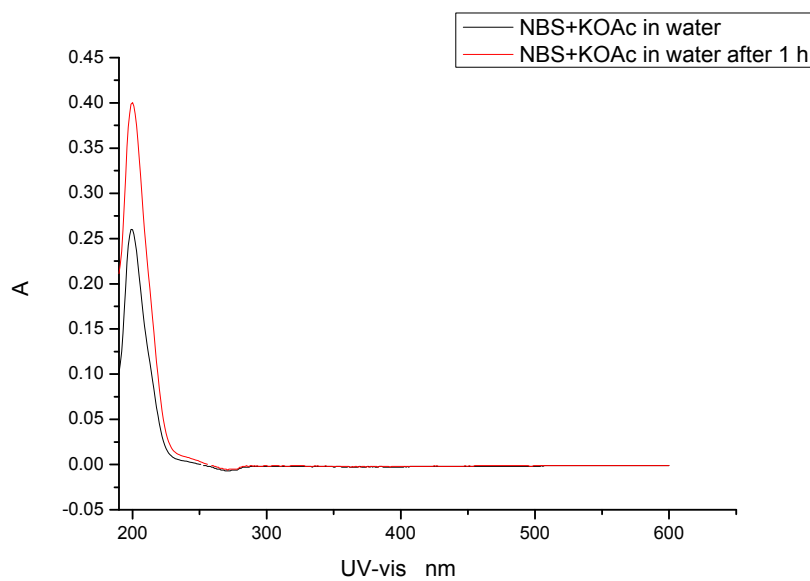

Figure S6. UV-visible absorbance spectra of NBS in water in the presence of KOAc.

The UV-visible spectra also indicate that the reaction between NBS and water in the presence of KOAc is slow.

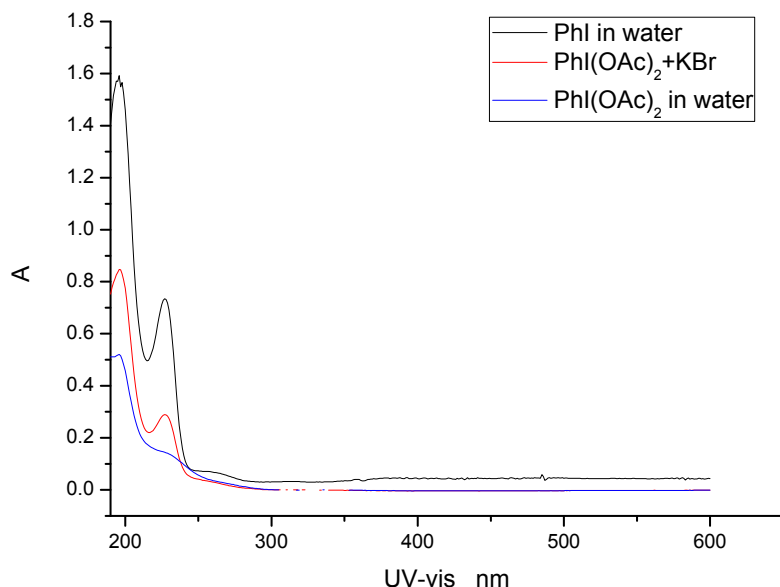

**Figure S7. UV-visible absorbance spectra of PhI(OAc)<sub>2</sub> and KBr in water in the presence of KOAc.**

The UV-visible spectra indicate that the reaction between PhI(OAc)<sub>2</sub> and KBr in water is rapid. Once PhI(OAc)<sub>2</sub> and KBr are added together in water, iodobenzene is observed. The finding is also confirmed by GC-MS spectrum. It is well in accordance with the observation by Corey. This results reveal that the forming HOBr is rapid, and the real oxidant species in the PhI(OAc)<sub>2</sub>/KBr/H<sub>2</sub>O OKR system is HOBr.<sup>3</sup>

## References

- 1 (a) J. F. Larrow, E. N. Jacobsen, Y. Gao, Y. Hong, X. Nie and C. M. Zepp, *J. Org. Chem.* 1994, **59**, 1939; (b) W. Sun, H. W. Wang, C. G. Xia, J. W. Li and P. Q. Zhao, *Angew. Chem. Int. Ed.*, 2003, **42**, 1042; (c) Q. G. Cheng, F. G. Deng, C. G. Xia and W. Sun, *Tetrahedron: Asymmetry*, 2008, **19**, 2359.
- 2 (a) H. Doucet, E. Fernandez, T. P. Layzell and J. M. Brown, *Chem. –A Eur. J.* 1999, **5**, 1320; (b) A. Blake, A. Cunningham, A. Ford and S. Woodward, *Chem. A Eur. J.* 2000, **6**, 19; (c) Y. Xu, G. C. Clarkson, G. Docherty, C. L. North, G. Woodward and M. Wills, *J. Org. Chem.* 2005, **70**, 8079; (d) K. Nakamura and T. Matsuda, *J. Org. Chem.* 1998, **63**, 8957; (e) Z. Li, Z. H. Tang, X. X. Hu and C. G. Xia, *Chem. –A Eur. J.*, 2005, **11**, 1210.
- 3 M. K. Brown, M. M. Blewett, J. R. Colombe and E. J. Corey, *J. Am. Chem. Soc.*, 2010, **132**, 11165.

## 6. Copies of GS or HPLC Spectra

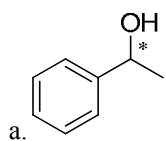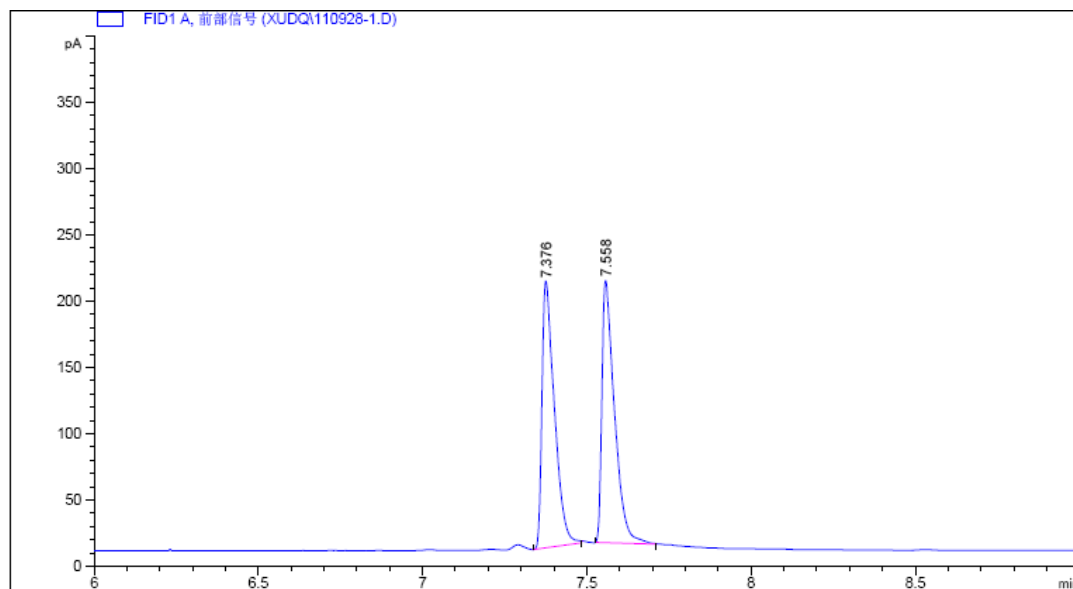

| 峰 # | 保留时间 [min] | 类型 | 峰宽 [min] | 峰面积 [pA*s] | 峰高 [pA]   | 峰面积 %    |
|-----|------------|----|----------|------------|-----------|----------|
| 1   | 7.376      | VB | 0.0377   | 526.71918  | 199.95245 | 50.11043 |
| 2   | 7.558      | BB | 0.0390   | 524.39777  | 197.47047 | 49.88957 |

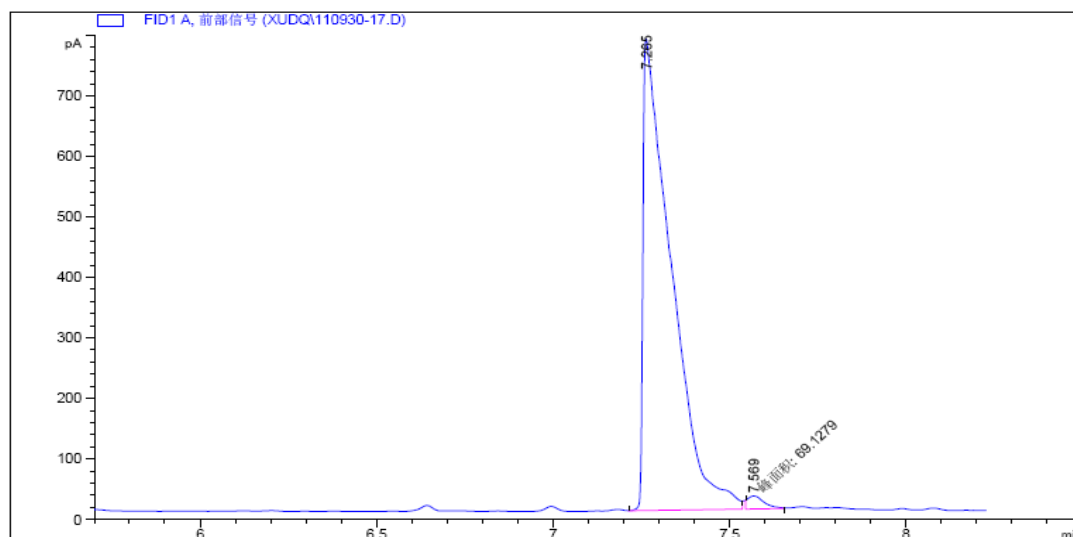

| 峰 # | 保留时间 [min] | 类型 | 峰宽 [min] | 峰面积 [pA*s] | 峰高 [pA]   | 峰面积 %    |
|-----|------------|----|----------|------------|-----------|----------|
| 1   | 7.265      | VV | 0.0727   | 4324.63184 | 780.40967 | 98.42668 |
| 2   | 7.569      | MF | 0.0543   | 69.12794   | 21.21583  | 1.57332  |

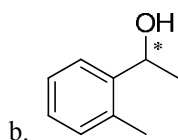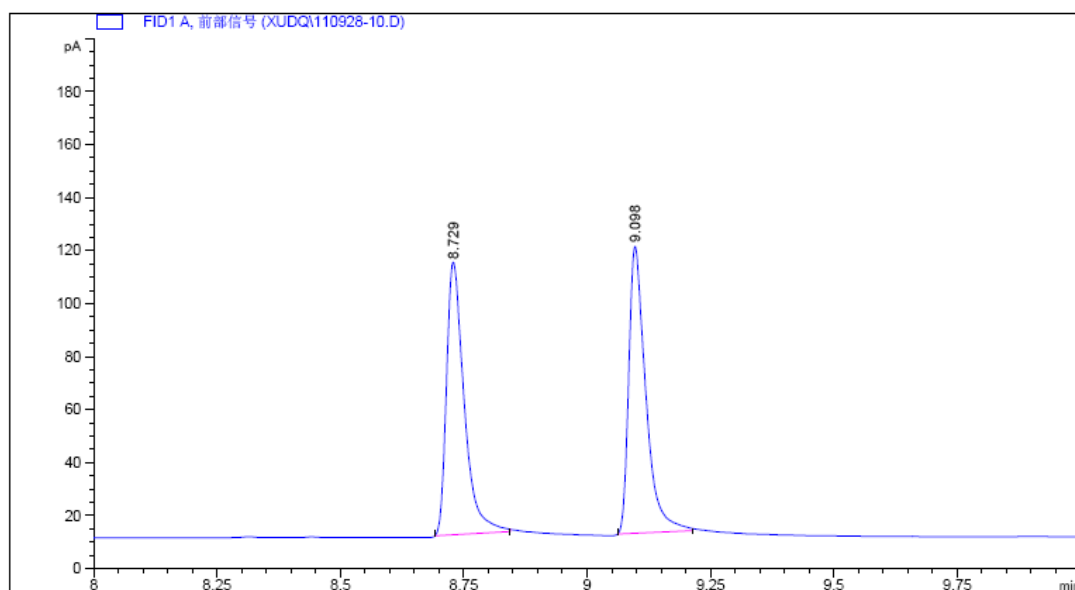

| 峰 # | 保留时间 [min] | 类型 | 峰宽 [min] | 峰面积 [pA*s] | 峰高 [pA]   | 峰面积 %    |
|-----|------------|----|----------|------------|-----------|----------|
| 1   | 8.729      | BB | 0.0372   | 256.11530  | 102.48384 | 49.67957 |
| 2   | 9.098      | BB | 0.0350   | 259.41913  | 108.19790 | 50.32043 |

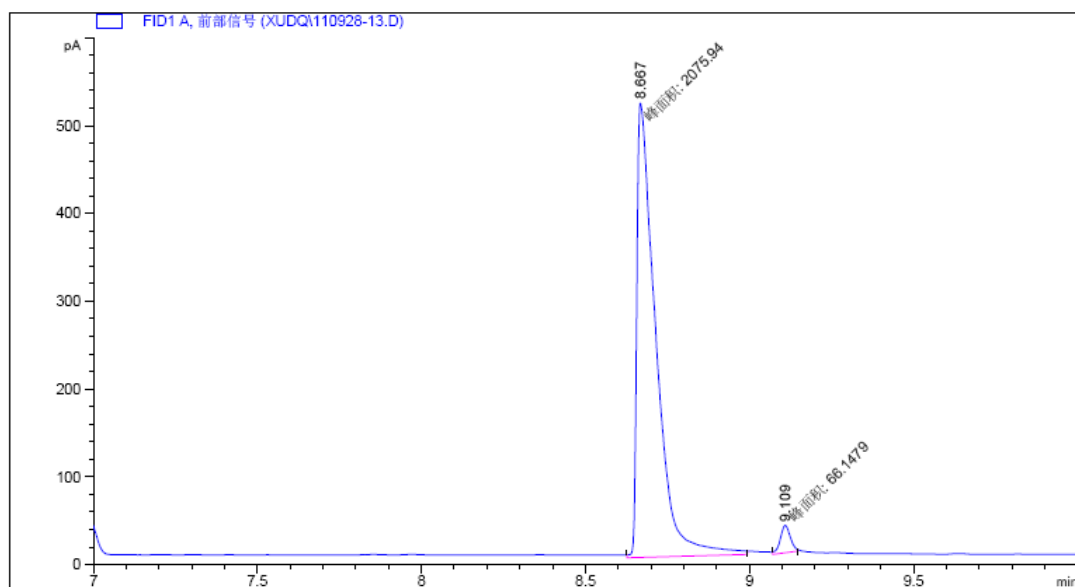

| 峰 # | 保留时间 [min] | 类型 | 峰宽 [min] | 峰面积 [pA*s] | 峰高 [pA]   | 峰面积 %    |
|-----|------------|----|----------|------------|-----------|----------|
| 1   | 8.667      | MM | 0.0668   | 2075.93921 | 518.05951 | 96.91199 |
| 2   | 9.109      | MM | 0.0353   | 66.14785   | 31.26530  | 3.08801  |



c.

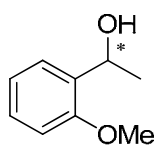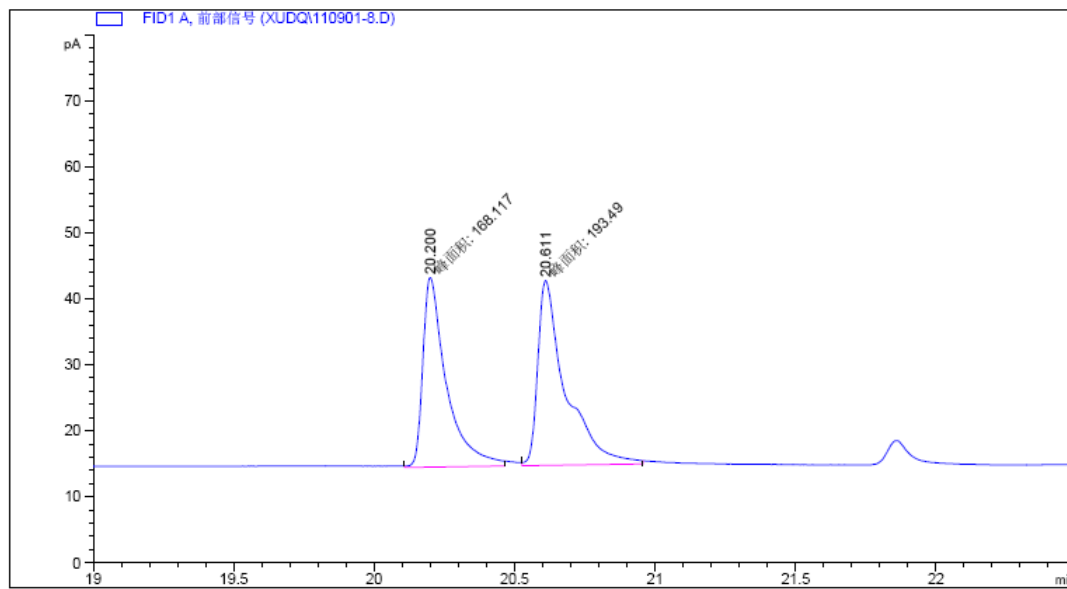

| 峰 # | 保留时间 [min] | 类型 | 峰宽 [min] | 峰面积 [pA*s] | 峰高 [pA]  | 峰面积 %    |
|-----|------------|----|----------|------------|----------|----------|
| 1   | 20.200     | MF | 0.0976   | 168.11693  | 28.71748 | 46.49166 |
| 2   | 20.611     | FM | 0.1150   | 193.48969  | 28.04255 | 53.50834 |

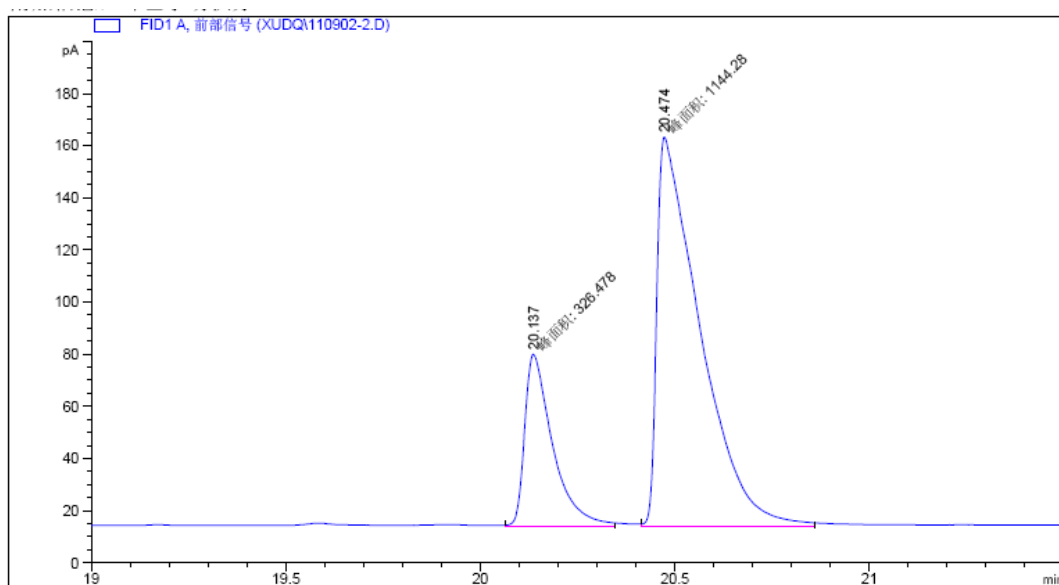

| 峰 # | 保留时间 [min] | 类型 | 峰宽 [min] | 峰面积 [pA*s] | 峰高 [pA]   | 峰面积 %    |
|-----|------------|----|----------|------------|-----------|----------|
| 1   | 20.137     | MF | 0.0826   | 326.47781  | 65.84028  | 22.19798 |
| 2   | 20.474     | FM | 0.1278   | 1144.27649 | 149.19771 | 77.80202 |

d.

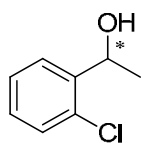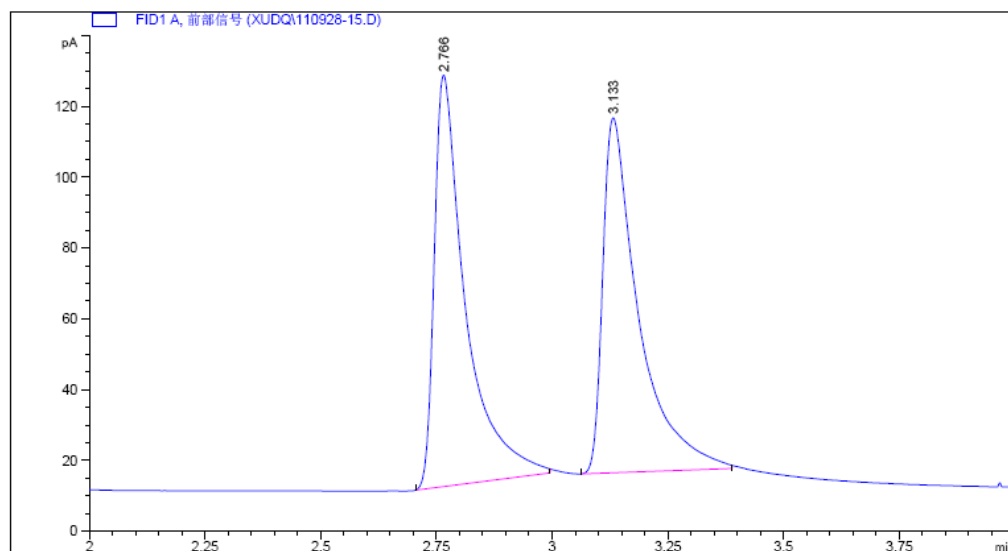

| 峰 # | 保留时间 [min] | 类型 | 峰宽 [min] | 峰面积 [pA*s] | 峰高 [pA]   | 峰面积 %    |
|-----|------------|----|----------|------------|-----------|----------|
| 1   | 2.766      | BB | 0.0678   | 545.18372  | 116.10116 | 50.33560 |
| 2   | 3.133      | BB | 0.0757   | 537.91400  | 100.13499 | 49.66440 |

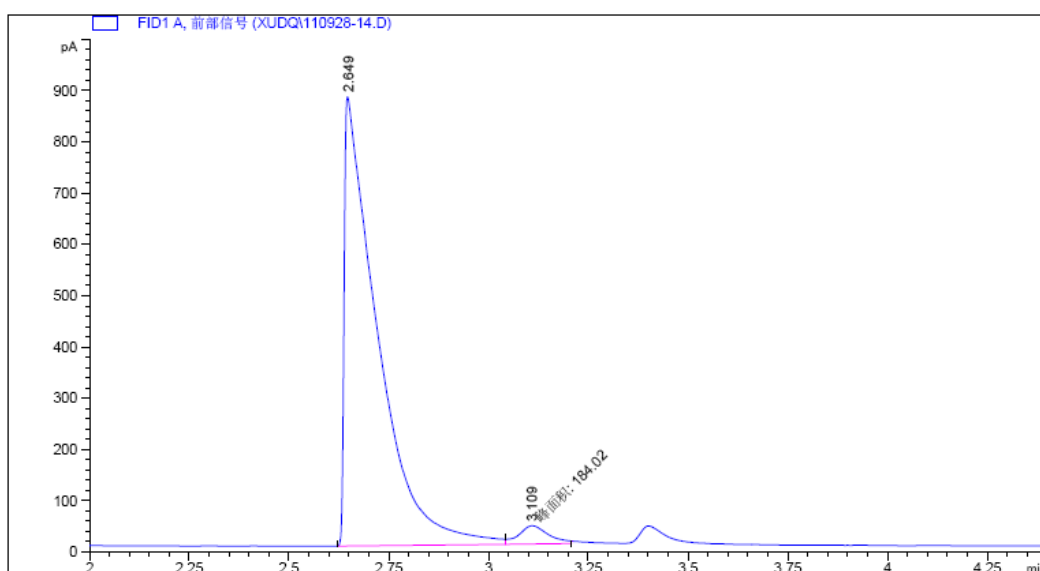

| 峰 # | 保留时间 [min] | 类型 | 峰宽 [min] | 峰面积 [pA*s] | 峰高 [pA]   | 峰面积 %    |
|-----|------------|----|----------|------------|-----------|----------|
| 1   | 2.649      | BV | 0.0730   | 5035.42383 | 877.13080 | 96.47433 |
| 2   | 3.109      | MF | 0.0866   | 184.02020  | 35.42723  | 3.52567  |

e.

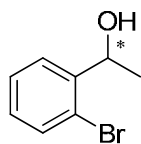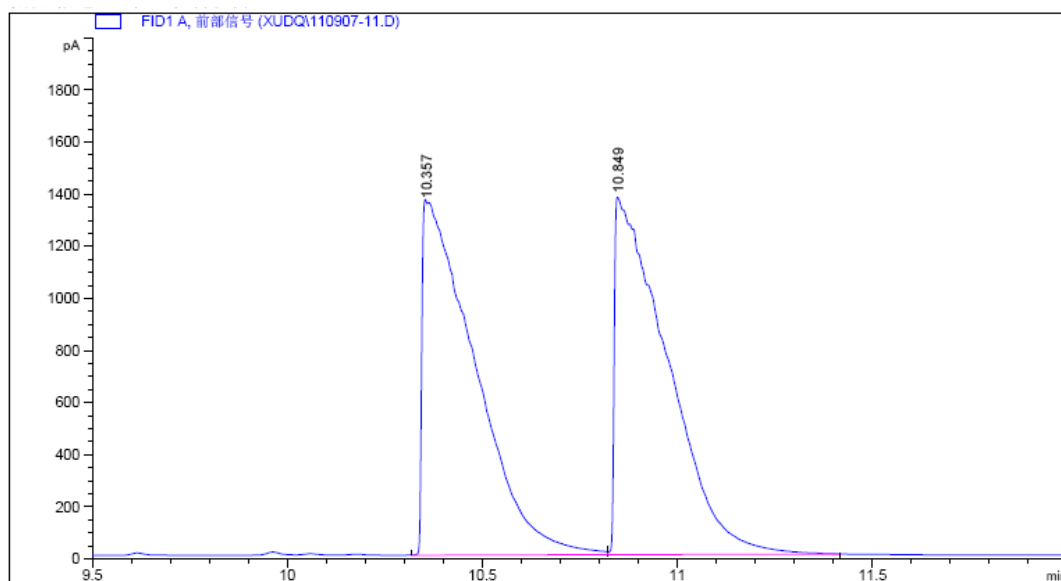

| 峰 # | 保留时间 [min] | 类型 | 峰宽 [min] | 峰面积 [pA*s] | 峰高 [pA]    | 峰面积 %    |
|-----|------------|----|----------|------------|------------|----------|
| 1   | 10.357     | BV | 0.1140   | 1.27539e4  | 1353.21326 | 49.85124 |
| 2   | 10.849     | VB | 0.1138   | 1.28300e4  | 1375.98450 | 50.14876 |

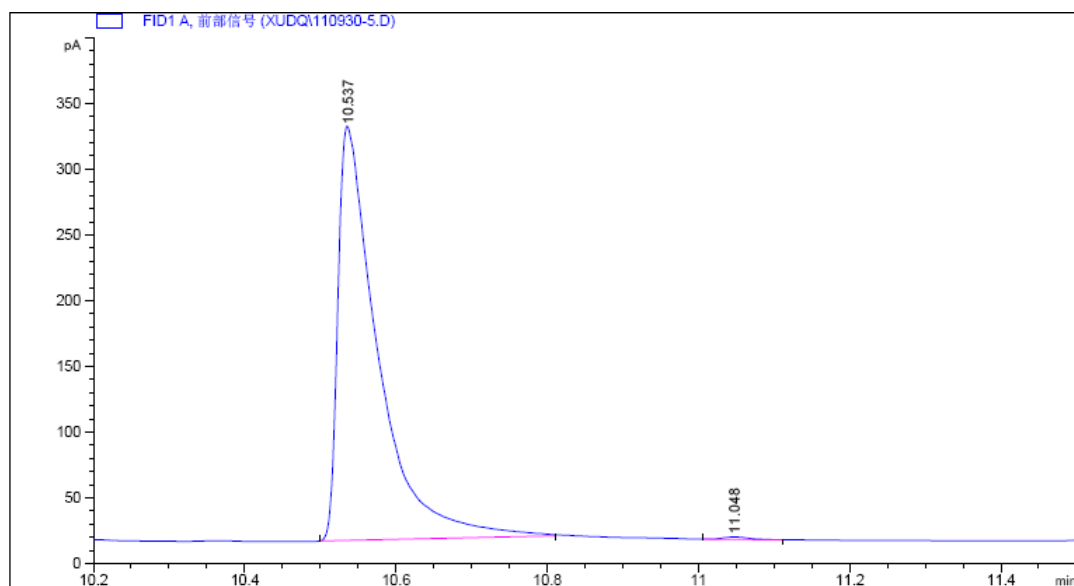

| 峰 # | 保留时间 [min] | 类型 | 峰宽 [min] | 峰面积 [pA*s] | 峰高 [pA]   | 峰面积 %    |
|-----|------------|----|----------|------------|-----------|----------|
| 1   | 10.537     | BB | 0.0533   | 1161.47424 | 313.22836 | 99.63171 |
| 2   | 11.048     | BB | 0.0354   | 4.29339    | 1.89529   | 0.36829  |

f.

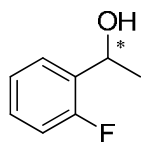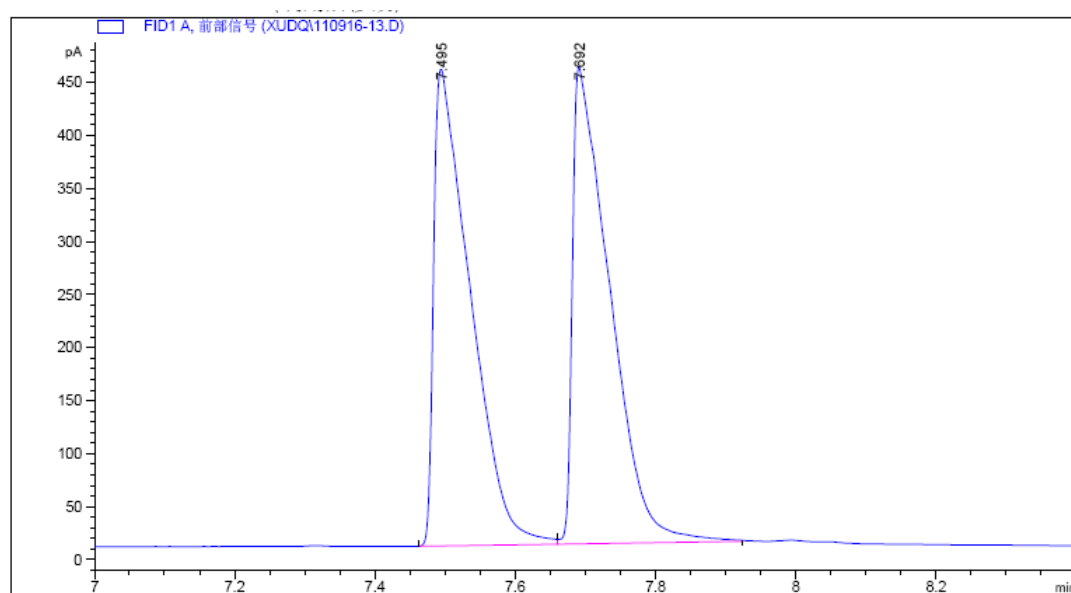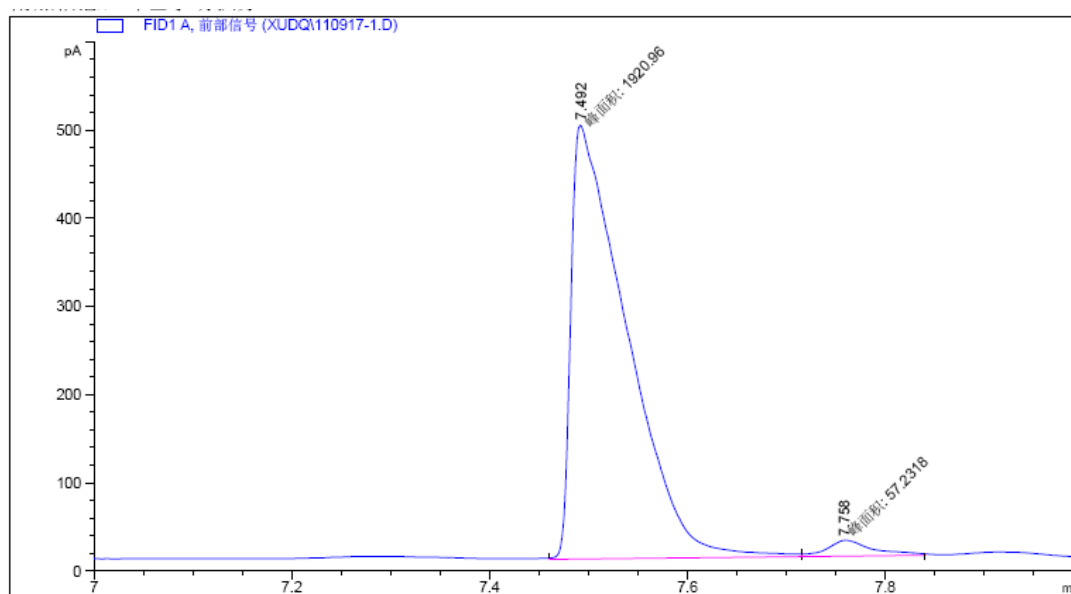

| 峰 # | 保留时间 [min] | 类型 | 峰宽 [min] | 峰面积 [pA*s] | 峰高 [pA]   | 峰面积 %    |
|-----|------------|----|----------|------------|-----------|----------|
| 1   | 7.492      | MF | 0.0649   | 1920.96411 | 493.57233 | 97.10687 |
| 2   | 7.758      | FM | 0.0538   | 57.23181   | 17.74626  | 2.89313  |

g.

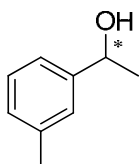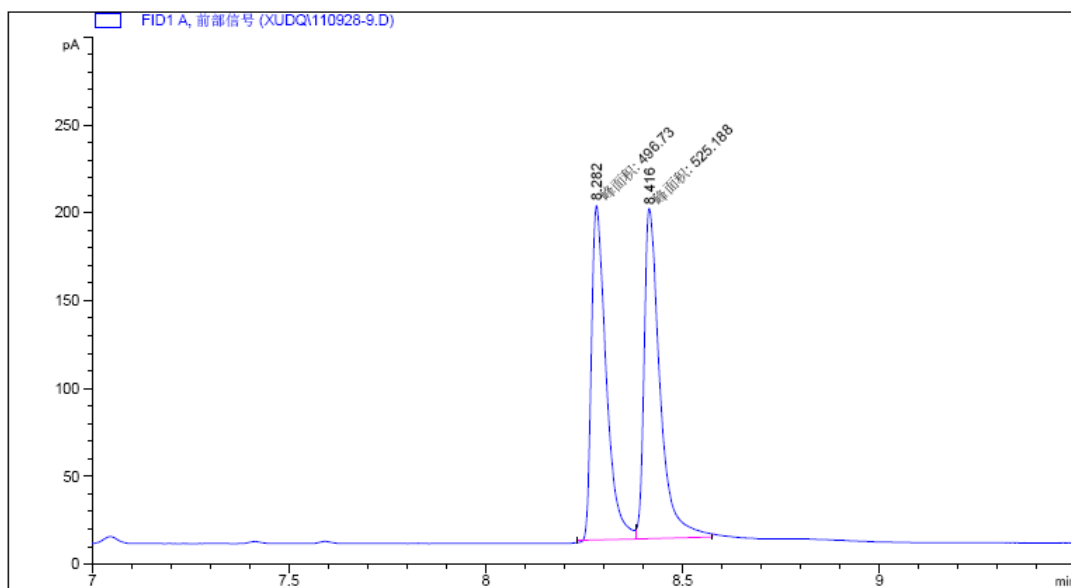

| 峰 # | 保留时间 [min] | 类型 | 峰宽 [min] | 峰面积 [pA*s] | 峰高 [pA]   | 峰面积 %    |
|-----|------------|----|----------|------------|-----------|----------|
| 1   | 8.282      | MF | 0.0434   | 496.72961  | 190.67015 | 48.60761 |
| 2   | 8.416      | FM | 0.0465   | 525.18787  | 188.05725 | 51.39239 |

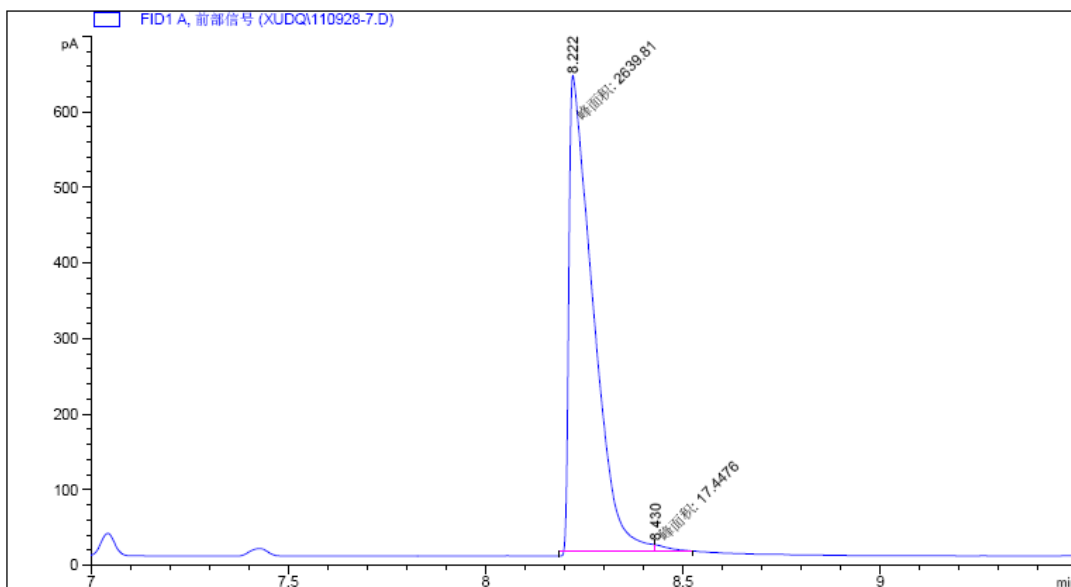

| 峰 # | 保留时间 [min] | 类型 | 峰宽 [min] | 峰面积 [pA*s] | 峰高 [pA]   | 峰面积 %    |
|-----|------------|----|----------|------------|-----------|----------|
| 1   | 8.222      | MF | 0.0699   | 2639.81323 | 629.36322 | 99.34340 |
| 2   | 8.430      | FM | 0.0355   | 17.44763   | 8.19494   | 0.65660  |

h.

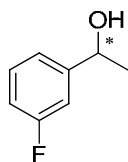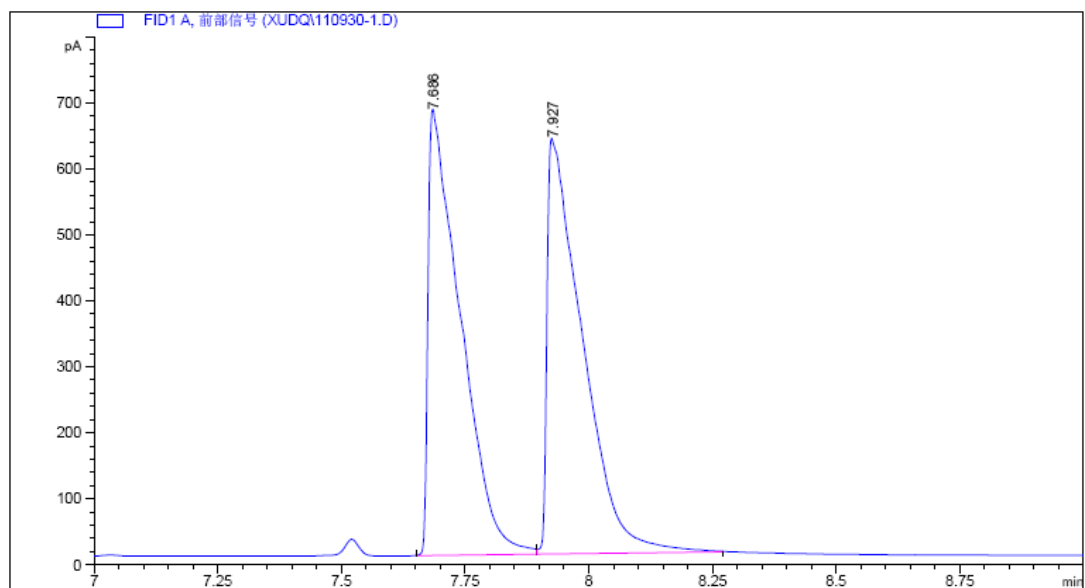

| 峰 # | 保留时间 [min] | 类型 | 峰宽 [min] | 峰面积 [pA*s] | 峰高 [pA]   | 峰面积 %    |
|-----|------------|----|----------|------------|-----------|----------|
| 1   | 7.686      | BV | 0.0604   | 3063.68140 | 669.82086 | 49.52985 |
| 2   | 7.927      | VB | 0.0683   | 3121.84448 | 625.10767 | 50.47015 |

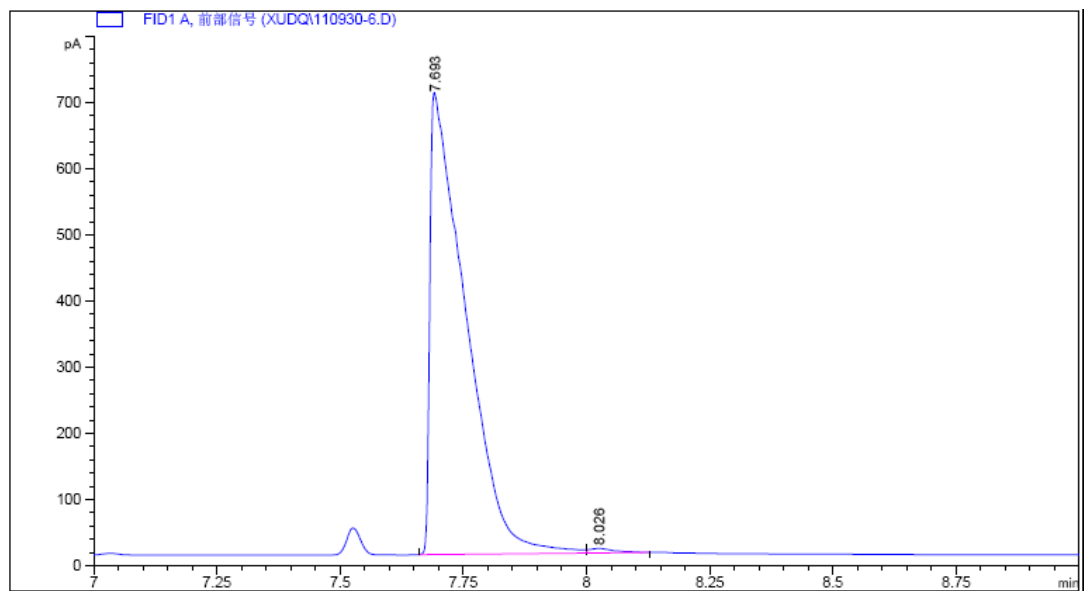

| 峰 # | 保留时间 [min] | 类型 | 峰宽 [min] | 峰面积 [pA*s] | 峰高 [pA]   | 峰面积 %    |
|-----|------------|----|----------|------------|-----------|----------|
| 1   | 7.693      | BB | 0.0639   | 3495.27002 | 692.06354 | 99.29864 |
| 2   | 8.026      | BB | 0.0534   | 24.68774   | 6.78842   | 0.70136  |

i.

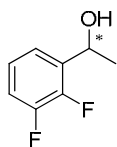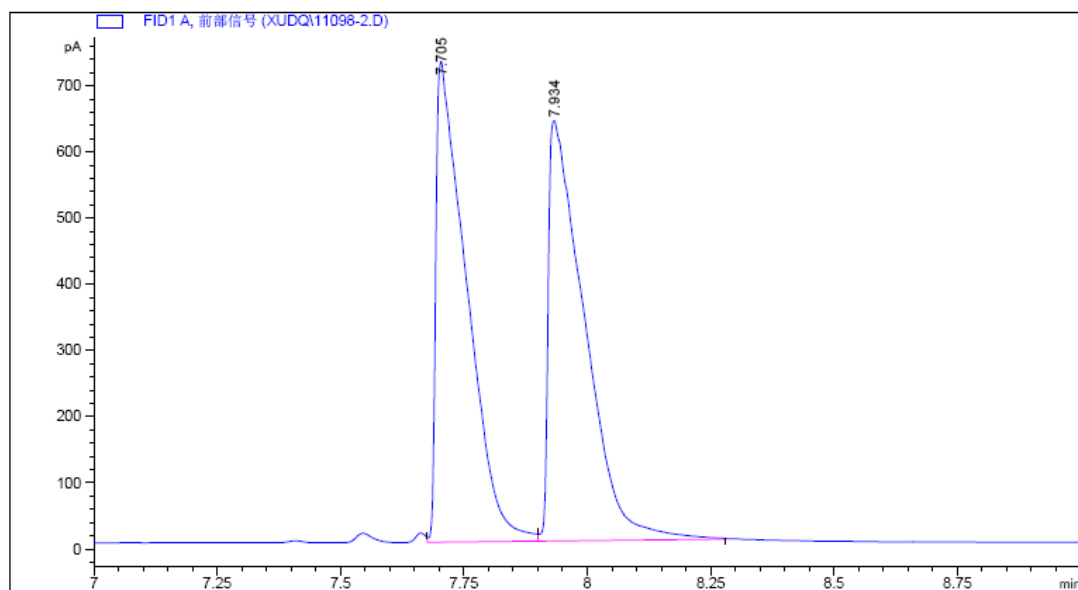

| 峰 # | 保留时间 [min] | 类型 | 峰宽 [min] | 峰面积 [pA*s] | 峰高 [pA]   | 峰面积 %    |
|-----|------------|----|----------|------------|-----------|----------|
| 1   | 7.705      | VV | 0.0554   | 3135.75879 | 726.07245 | 49.29120 |
| 2   | 7.934      | VB | 0.0683   | 3225.94165 | 634.42914 | 50.70880 |

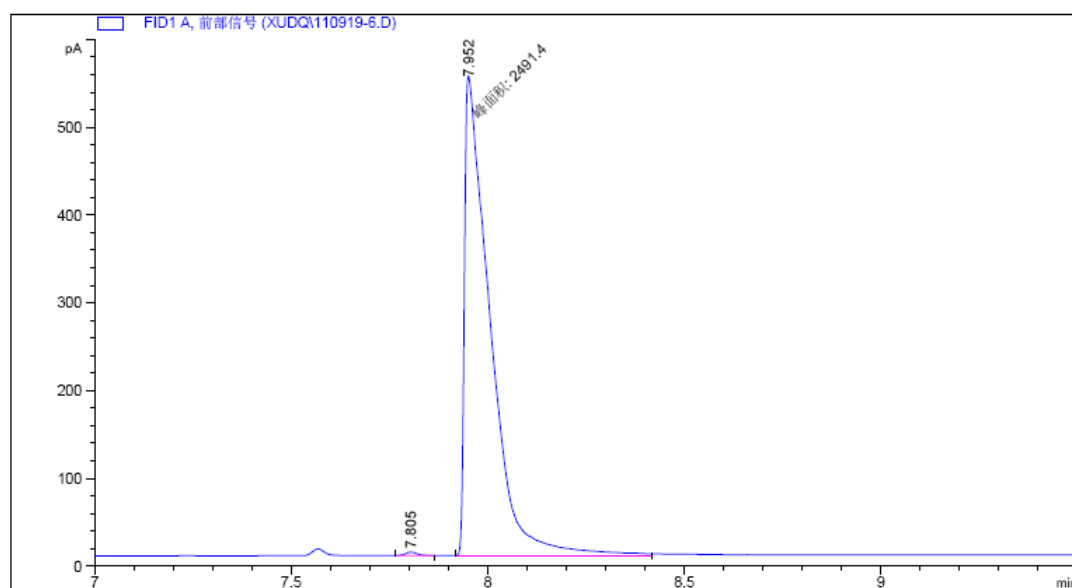

| 峰 # | 保留时间 [min] | 类型 | 峰宽 [min] | 峰面积 [pA*s] | 峰高 [pA]   | 峰面积 %    |
|-----|------------|----|----------|------------|-----------|----------|
| 1   | 7.805      | BB | 0.0317   | 7.77264    | 3.81967   | 0.31101  |
| 2   | 7.952      | MM | 0.0757   | 2491.40234 | 548.85846 | 99.68899 |

j.

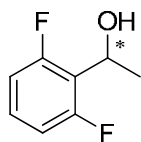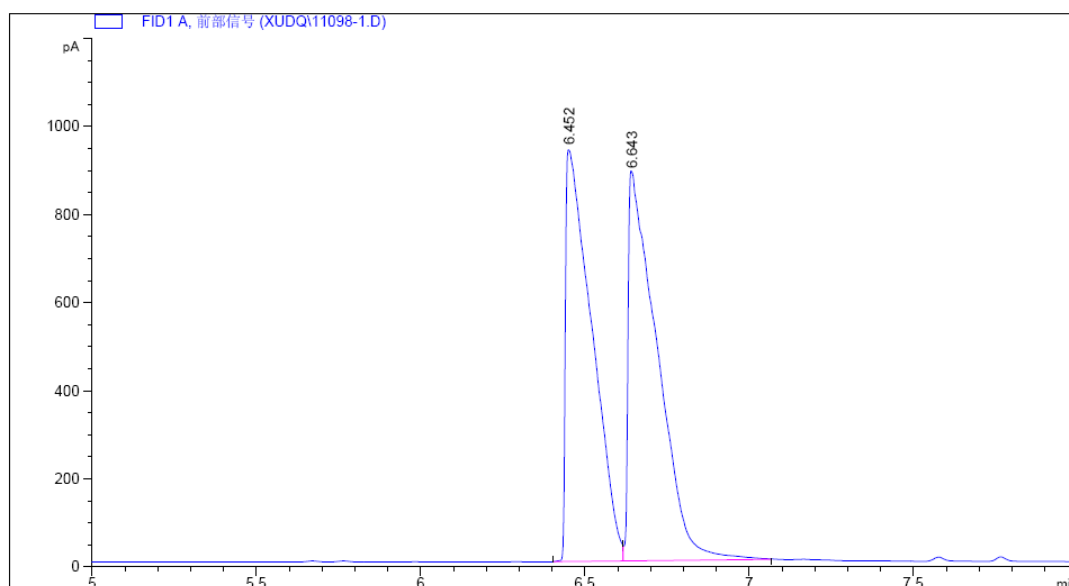

| 峰 # | 保留时间 [min] | 类型 | 峰宽 [min] | 峰面积 [pA*s] | 峰高 [pA]   | 峰面积 %    |
|-----|------------|----|----------|------------|-----------|----------|
| 1   | 6.452      | BV | 0.0734   | 5174.88574 | 937.08588 | 48.79681 |
| 2   | 6.643      | VB | 0.0768   | 5430.08057 | 882.31976 | 51.20319 |

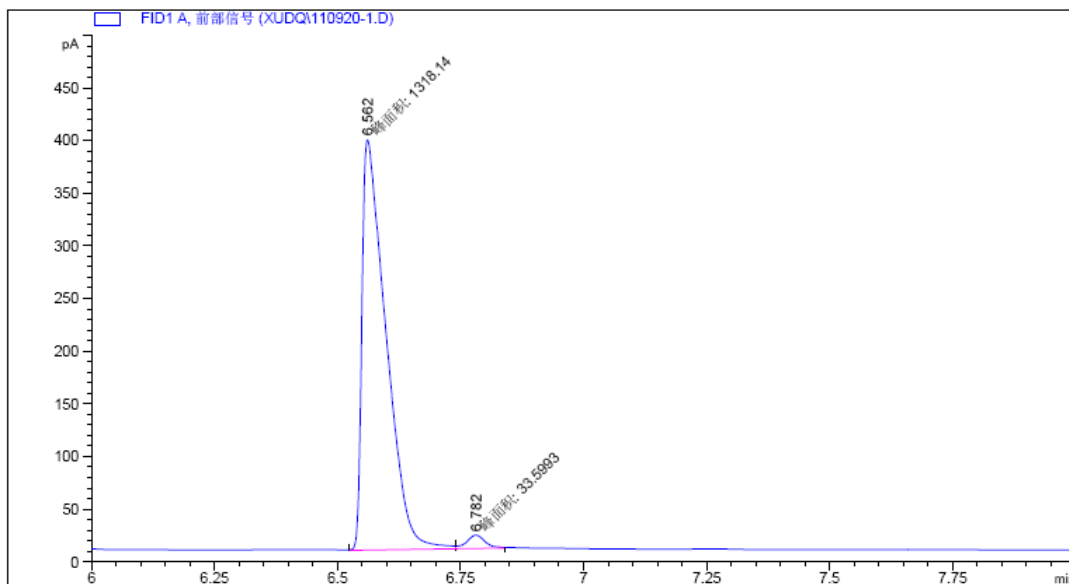

| 峰 # | 保留时间 [min] | 类型 | 峰宽 [min] | 峰面积 [pA*s] | 峰高 [pA]   | 峰面积 %    |
|-----|------------|----|----------|------------|-----------|----------|
| 1   | 6.562      | MF | 0.0563   | 1318.13525 | 389.91962 | 97.51436 |
| 2   | 6.782      | FM | 0.0434   | 33.59927   | 12.88979  | 2.48564  |

k.



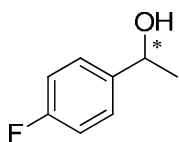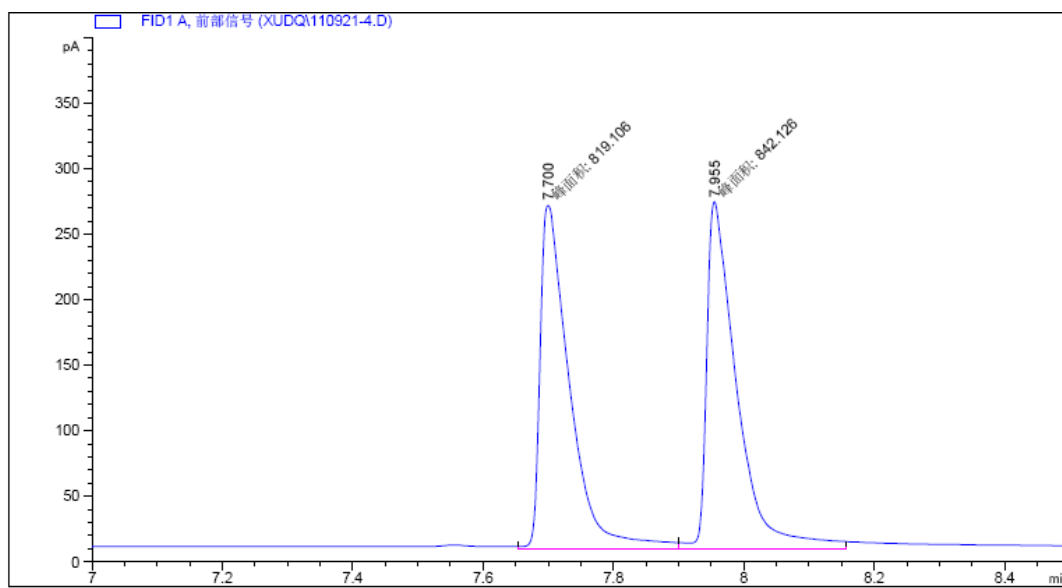

| 峰 # | 保留时间 [min] | 类型 | 峰宽 [min] | 峰面积 [pA*s] | 峰高 [pA]   | 峰面积 %    |
|-----|------------|----|----------|------------|-----------|----------|
| 1   | 7.700      | MF | 0.0520   | 819.10571  | 262.69031 | 49.30712 |
| 2   | 7.955      | FM | 0.0530   | 842.12646  | 265.02542 | 50.69288 |

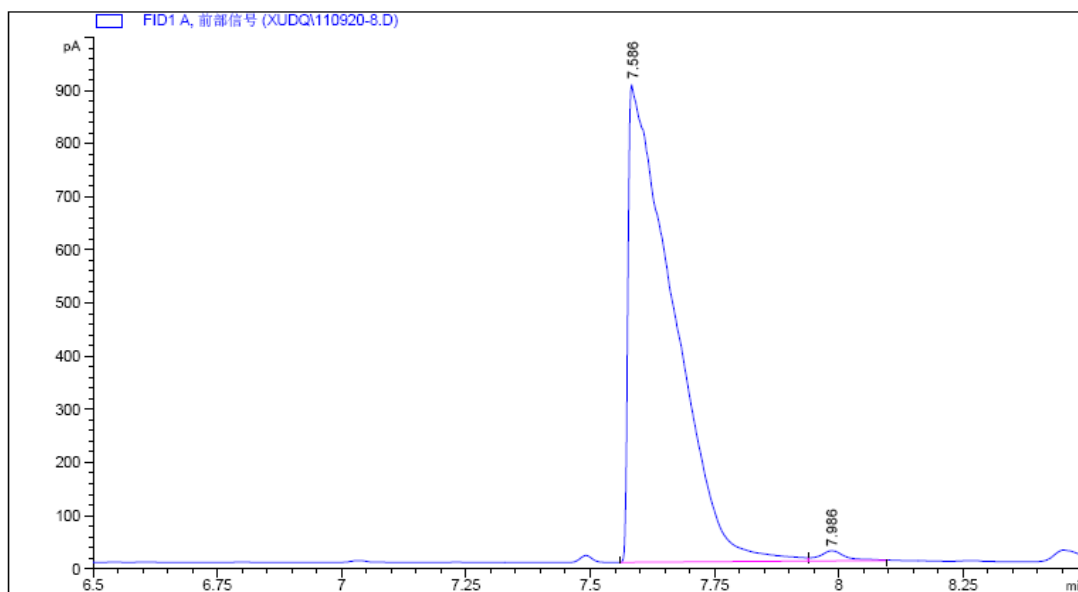

| 峰 # | 保留时间 [min] | 类型 | 峰宽 [min] | 峰面积 [pA*s] | 峰高 [pA]   | 峰面积 %    |
|-----|------------|----|----------|------------|-----------|----------|
| 1   | 7.586      | BV | 0.0782   | 5591.35205 | 902.99298 | 98.77791 |
| 2   | 7.986      | VB | 0.0519   | 69.17697   | 18.82023  | 1.22209  |

1.

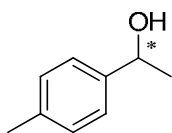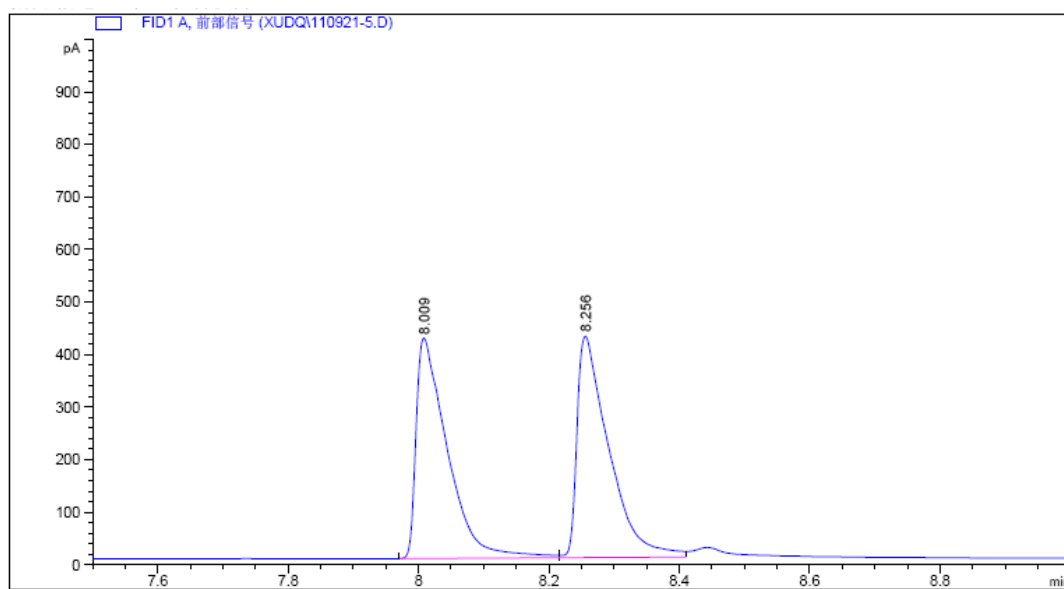

| 峰 # | 保留时间 [min] | 类型 | 峰宽 [min] | 峰面积 [pA*s] | 峰高 [pA]   | 峰面积 %    |
|-----|------------|----|----------|------------|-----------|----------|
| 1   | 8.009      | BV | 0.0459   | 1395.99414 | 418.55594 | 49.49392 |
| 2   | 8.256      | VV | 0.0474   | 1424.54260 | 421.35721 | 50.50608 |

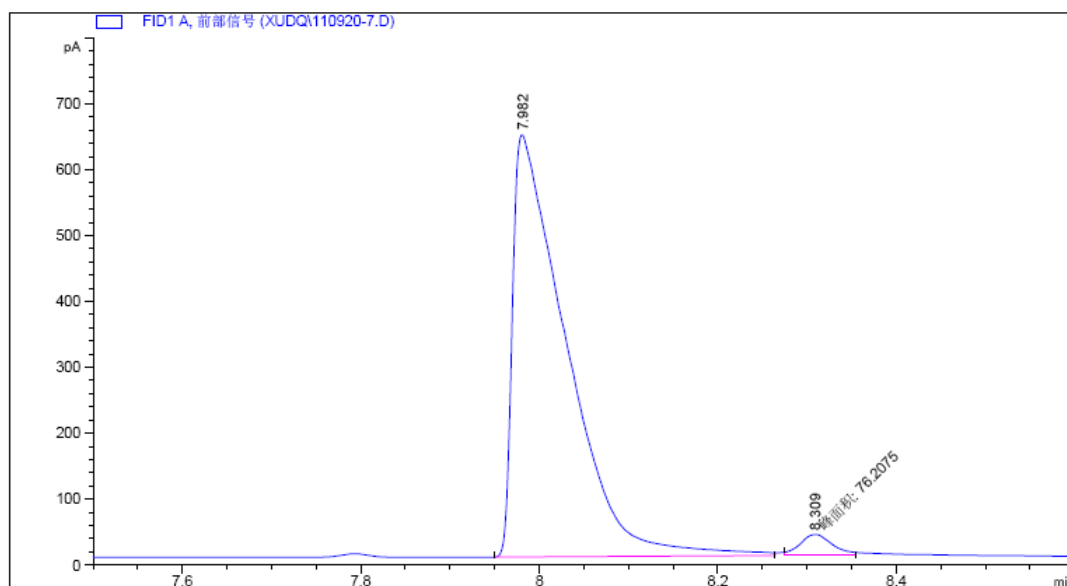

| 峰 # | 保留时间 [min] | 类型 | 峰宽 [min] | 峰面积 [pA*s] | 峰高 [pA]   | 峰面积 %    |
|-----|------------|----|----------|------------|-----------|----------|
| 1   | 7.982      | BB | 0.0565   | 2665.38989 | 641.23517 | 97.22033 |
| 2   | 8.309      | MM | 0.0407   | 76.20746   | 31.20559  | 2.77967  |

m.

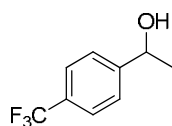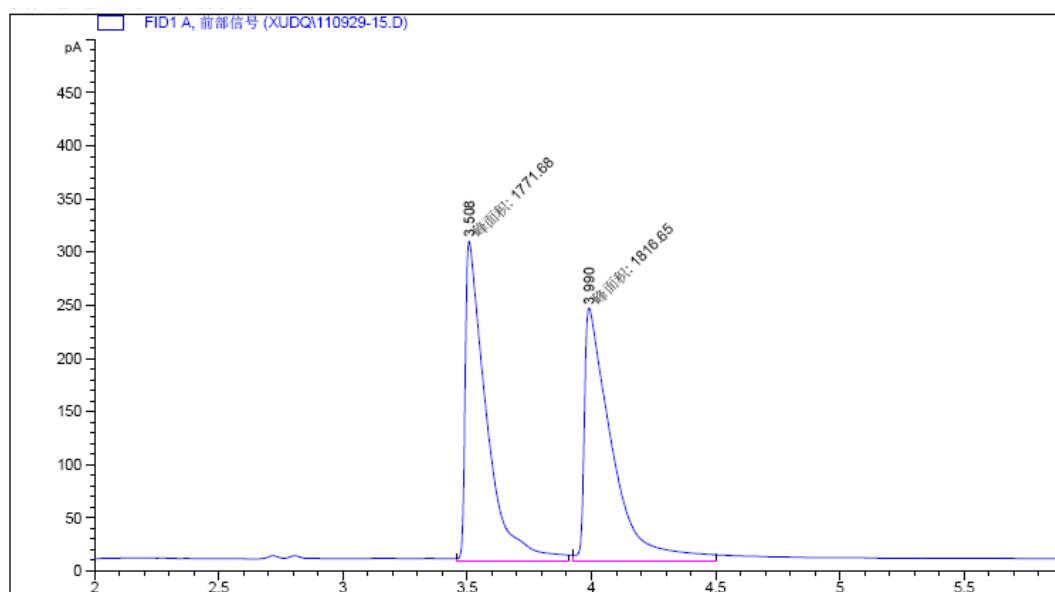

| 峰 # | 保留时间 [min] | 类型 | 峰宽 [min] | 峰面积 [pA*s] | 峰高 [pA]   | 峰面积 %    |
|-----|------------|----|----------|------------|-----------|----------|
| 1   | 3.508      | MF | 0.0982   | 1771.67651 | 300.65964 | 49.37339 |
| 2   | 3.990      | FM | 0.1274   | 1816.64624 | 237.73053 | 50.62661 |

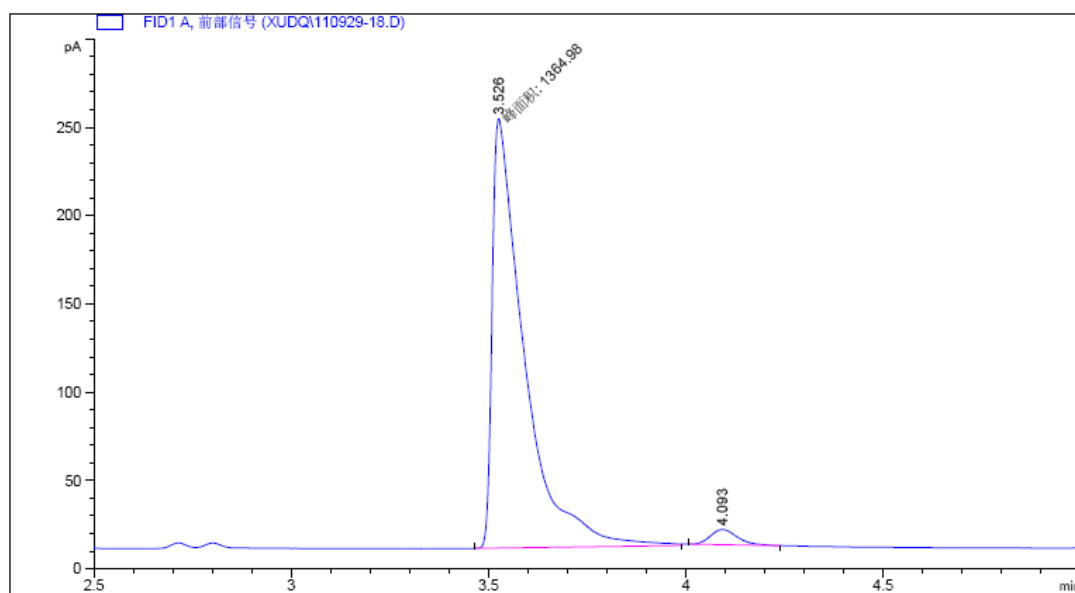

| 峰 # | 保留时间 [min] | 类型 | 峰宽 [min] | 峰面积 [pA*s] | 峰高 [pA]   | 峰面积 %    |
|-----|------------|----|----------|------------|-----------|----------|
| 1   | 3.526      | MM | 0.0935   | 1364.97949 | 243.18668 | 97.07622 |
| 2   | 4.093      | BB | 0.0748   | 41.11093   | 8.58982   | 2.92378  |

n.

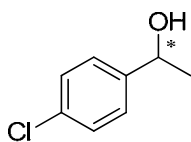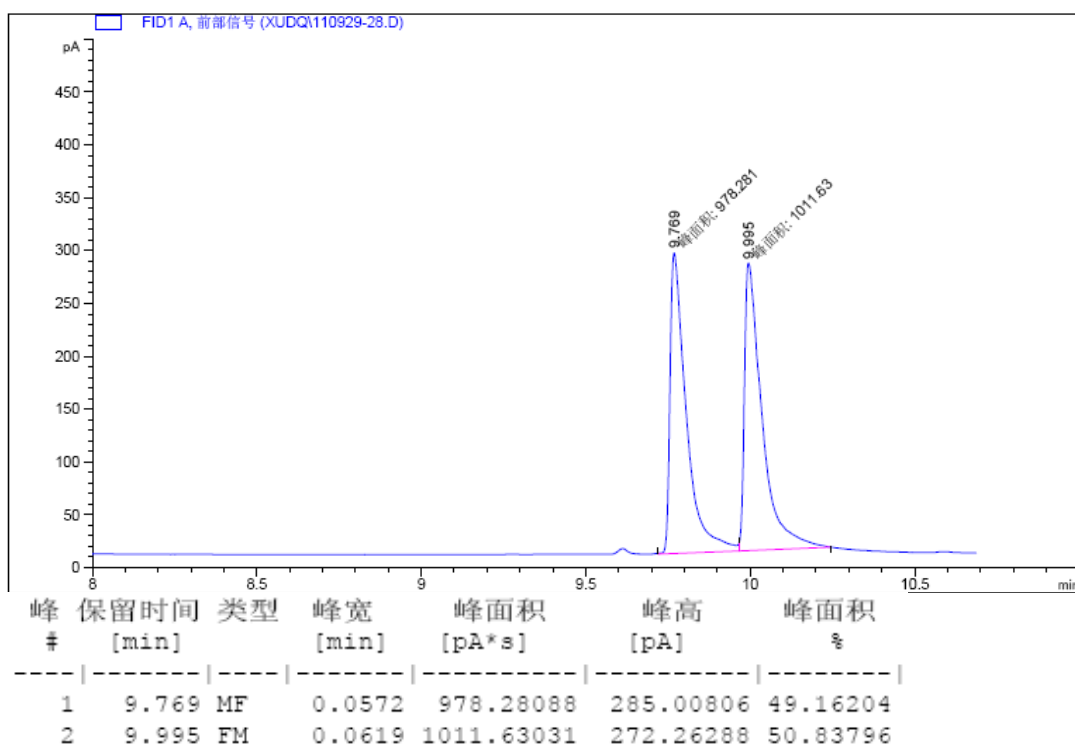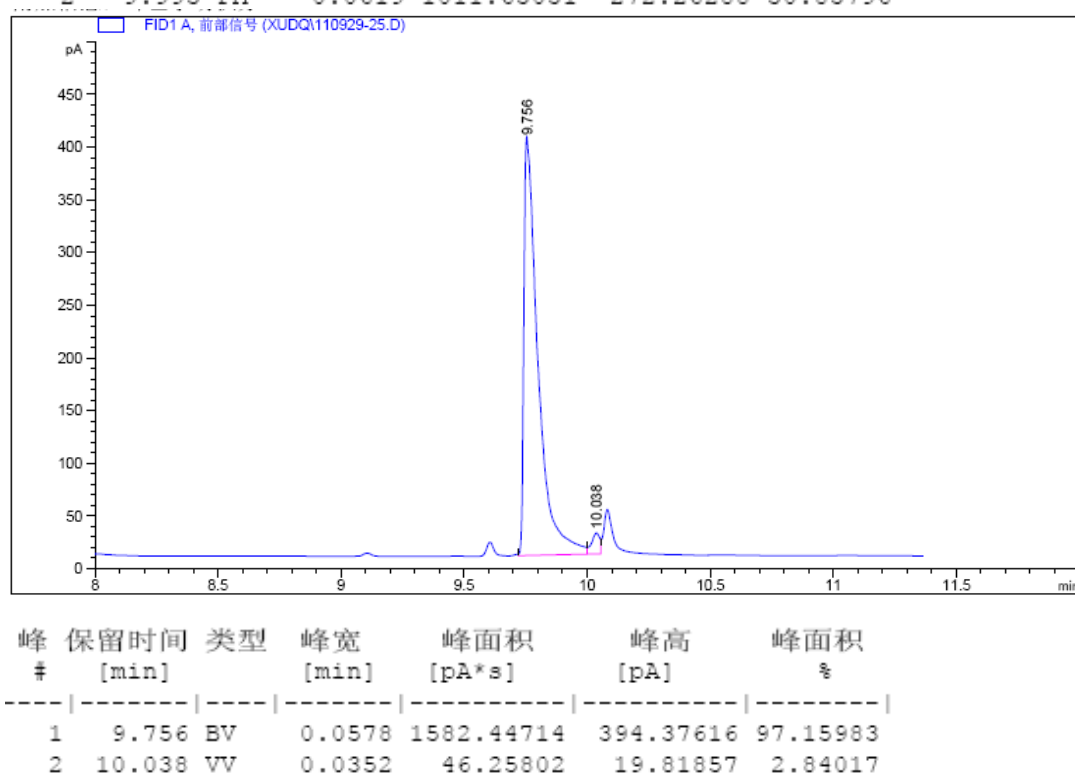

0.

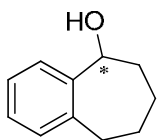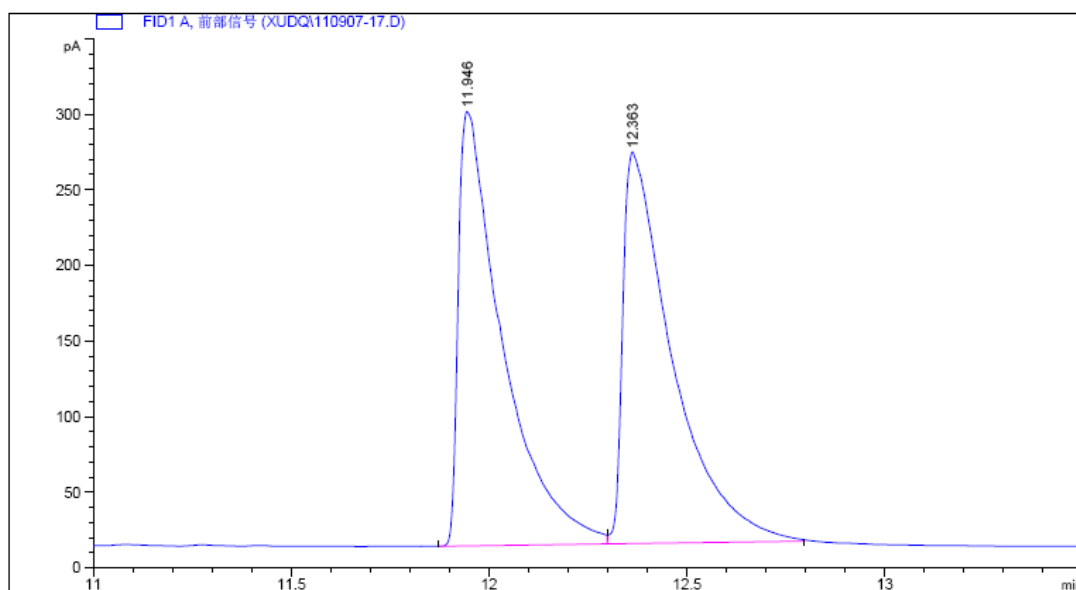

| 峰 # | 保留时间 [min] | 类型 | 峰宽 [min] | 峰面积 [pA*s] | 峰高 [pA]   | 峰面积 %    |
|-----|------------|----|----------|------------|-----------|----------|
| 1   | 11.946     | BV | 0.1033   | 2226.39087 | 287.51370 | 49.80019 |
| 2   | 12.363     | VB | 0.1132   | 2244.25635 | 258.67844 | 50.19981 |

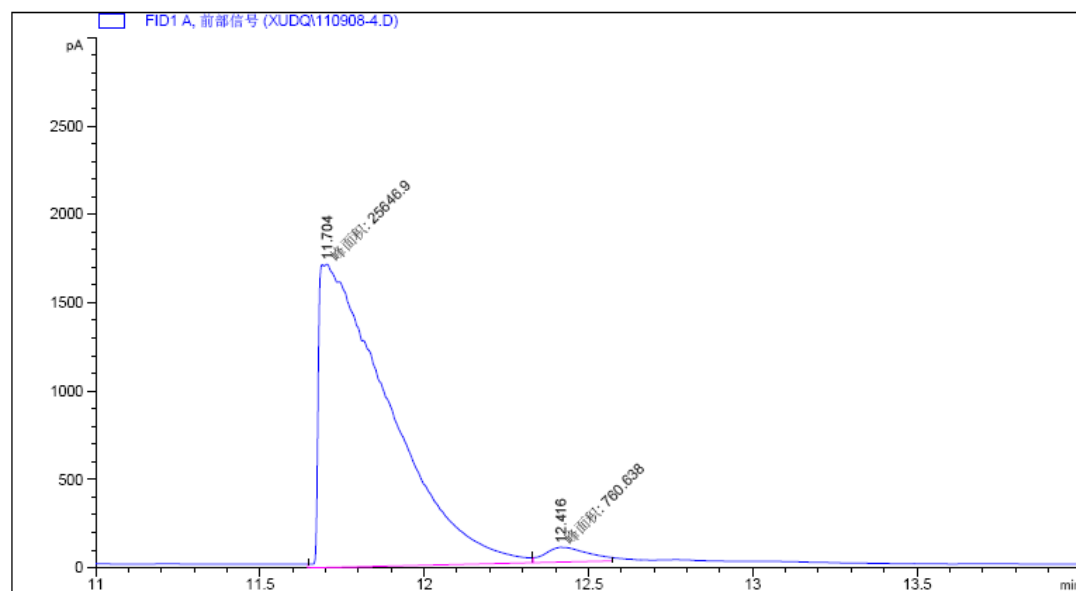

| 峰 # | 保留时间 [min] | 类型 | 峰宽 [min] | 峰面积 [pA*s] | 峰高 [pA]    | 峰面积 %    |
|-----|------------|----|----------|------------|------------|----------|
| 1   | 11.704     | MF | 0.2491   | 2.56469e4  | 1715.69470 | 97.11962 |
| 2   | 12.416     | FM | 0.1520   | 760.63751  | 83.40169   | 2.88038  |

p

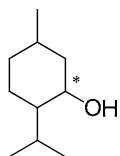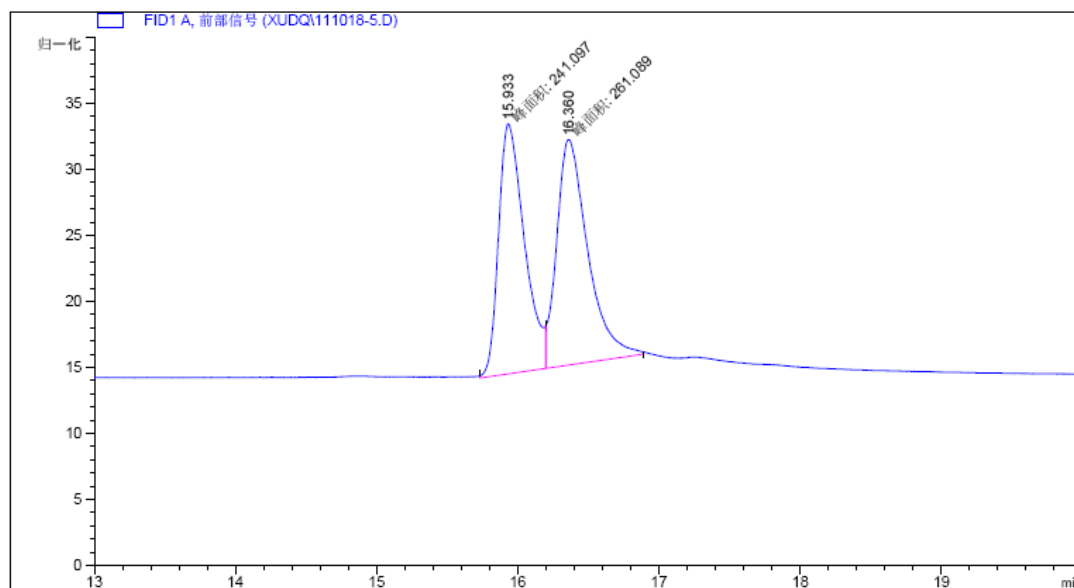

| 峰 # | 保留时间 [min] | 类型 | 峰宽 [min] | 峰面积 [pA*s] | 峰高 [pA]  | 峰面积 %    |
|-----|------------|----|----------|------------|----------|----------|
| 1   | 15.933     | MF | 0.2121   | 241.09747  | 18.94121 | 48.00959 |
| 2   | 16.360     | FM | 0.2550   | 261.08856  | 17.06714 | 51.99041 |

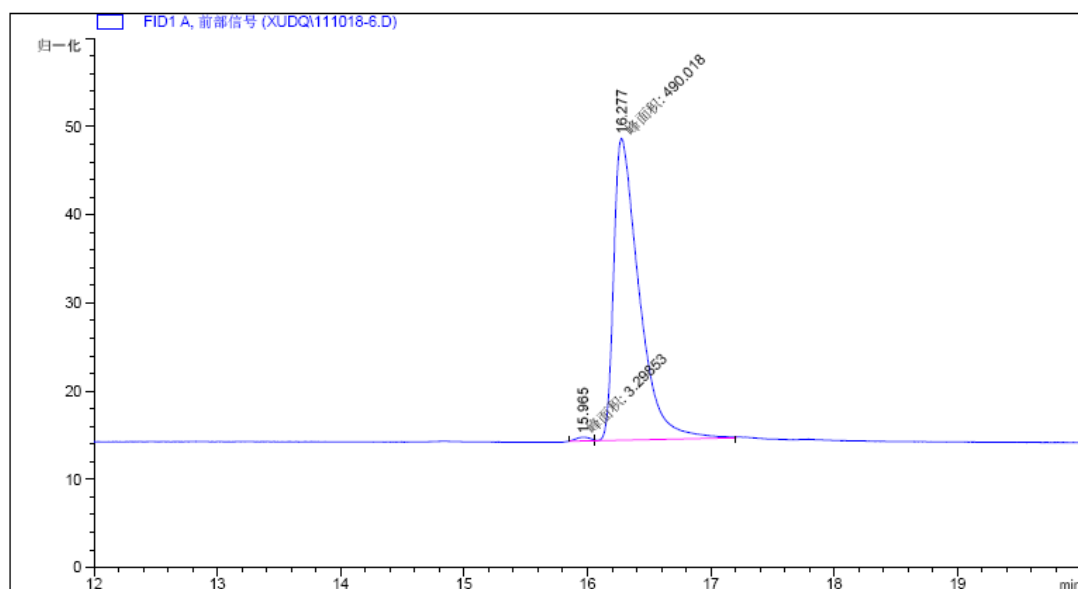

| 峰 # | 保留时间 [min] | 类型 | 峰宽 [min] | 峰面积 [pA*s] | 峰高 [pA]    | 峰面积 %    |
|-----|------------|----|----------|------------|------------|----------|
| 1   | 15.965     | MF | 0.1262   | 3.29853    | 4.35644e-1 | 0.66864  |
| 2   | 16.277     | FM | 0.2385   | 490.01843  | 34.24429   | 99.33136 |

9

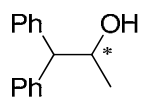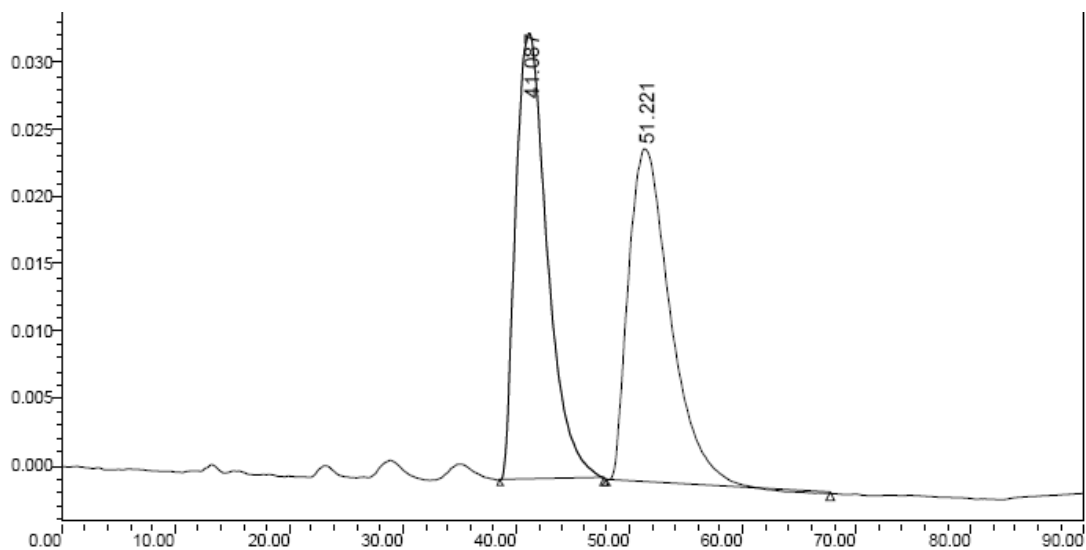

| RT (min) | Area (V*sec) | %Area | Heigh (V) | % Heigh |
|----------|--------------|-------|-----------|---------|
| 41.081   | 432509       | 50.07 | 33220     | 57.27   |
| 51.221   | 414313       | 49.93 | 24788     | 42.73   |

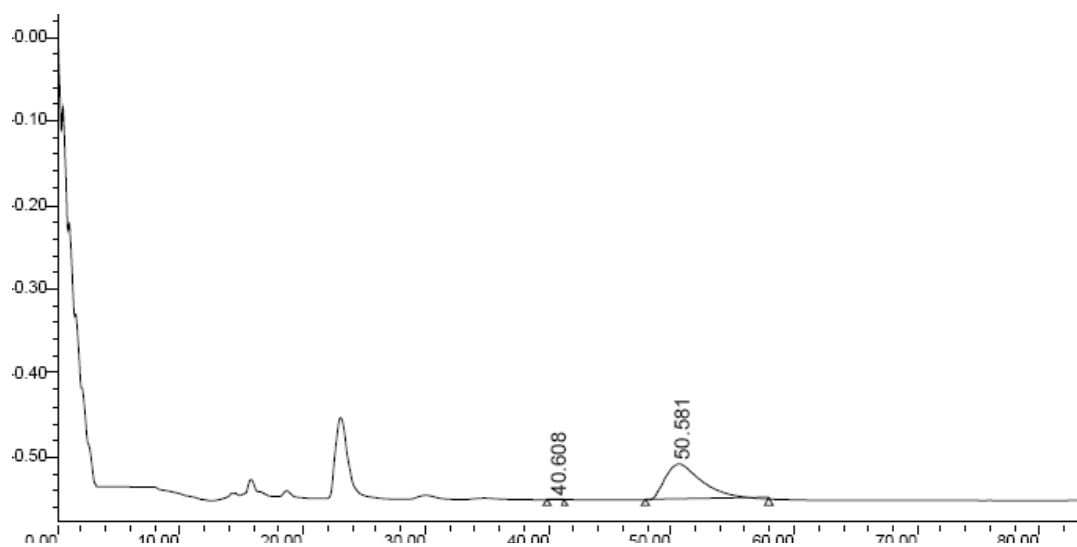

| RT (min) | Area (V*sec) | %Area | Heigh (V) | % Heigh |
|----------|--------------|-------|-----------|---------|
| 40.608   | 3838         | 0.04  | 72        | 0.17    |
| 50.581   | 122547       | 99.96 | 42378     | 99.83   |

I.

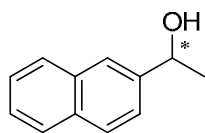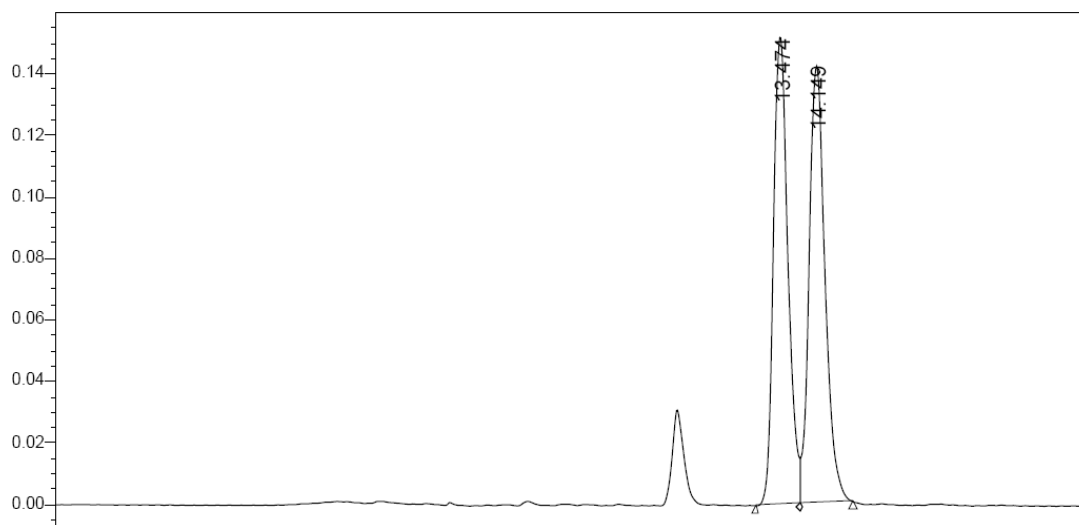

| RT (min) | Area (V*sec) | %Area  | Height (V) | % Height |
|----------|--------------|--------|------------|----------|
| 13.474   | 2862315      | 49.361 | 52230      | 51.69    |
| 14.149   | 2936678      | 50.641 | 42260      | 48.31    |

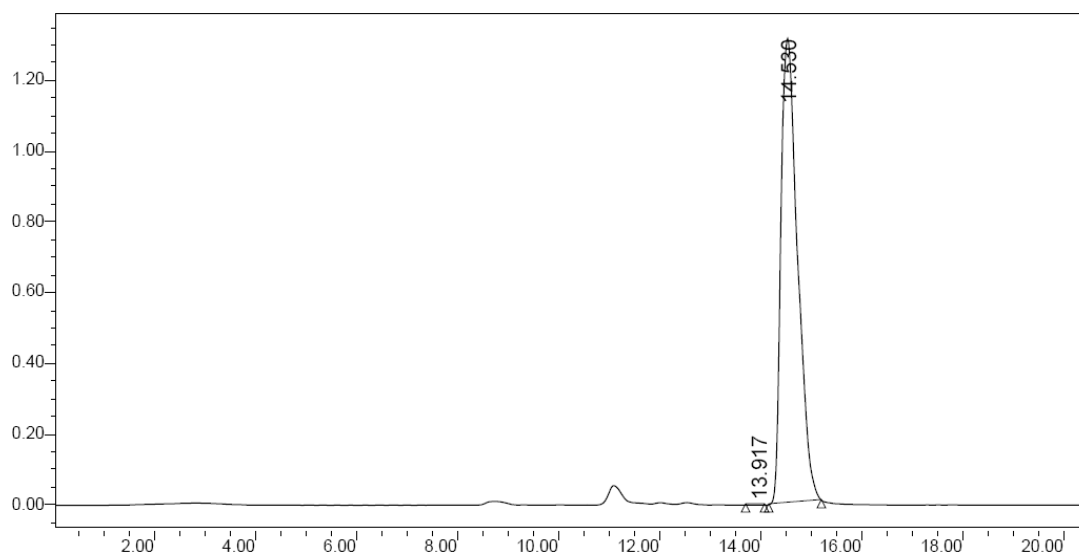

| RT (min) | Area (V*sec) | %Area  | Height (V) | % Height |
|----------|--------------|--------|------------|----------|
| 13.917   | 417          | 0.00   | 46         | 0.00     |
| 14.530   | 30216764     | 100.00 | 315793     | 100.00   |

s.



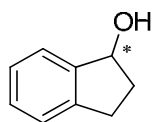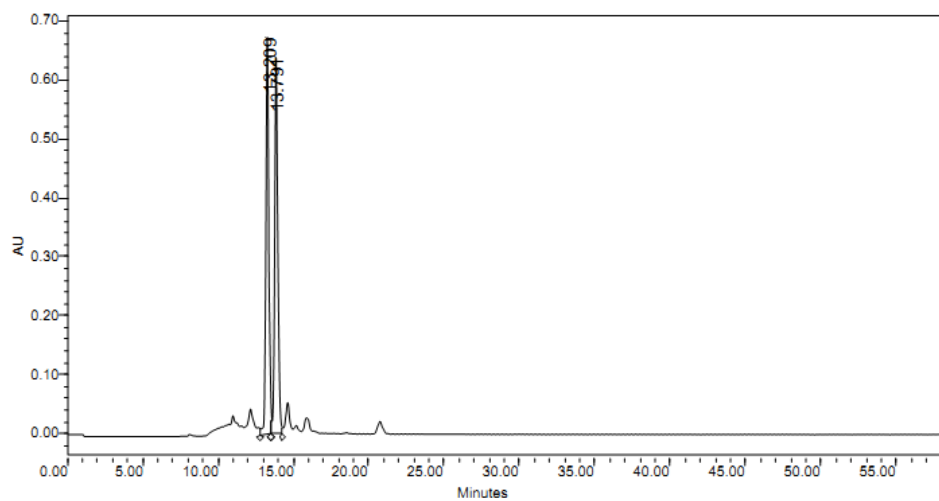

| RT (min) | Area (Vsec) | %Area  | Height (V) | % Height |
|----------|-------------|--------|------------|----------|
| 113.2099 | 190580      | 50.076 | 77683      | 51.29    |
| 213.7919 | 164655      | 49.936 | 43708      | 48.71    |

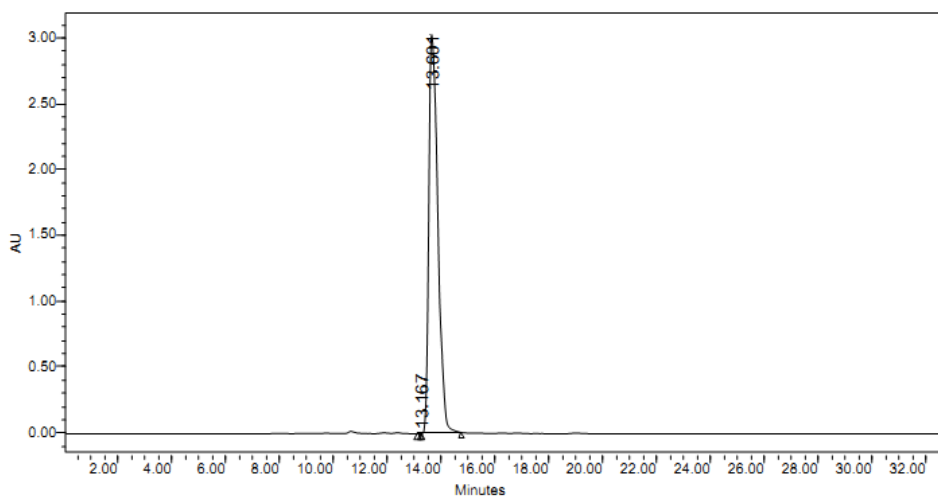

| RT (min) | Area (Vsec) | %Area  | Height (V) | % Height |
|----------|-------------|--------|------------|----------|
| 113.167  | 604         | 0.00   | -161       | 0.01     |
| 213.6017 | 638258      | 100.00 | 27292      | 99.99    |

t

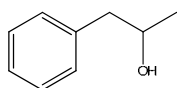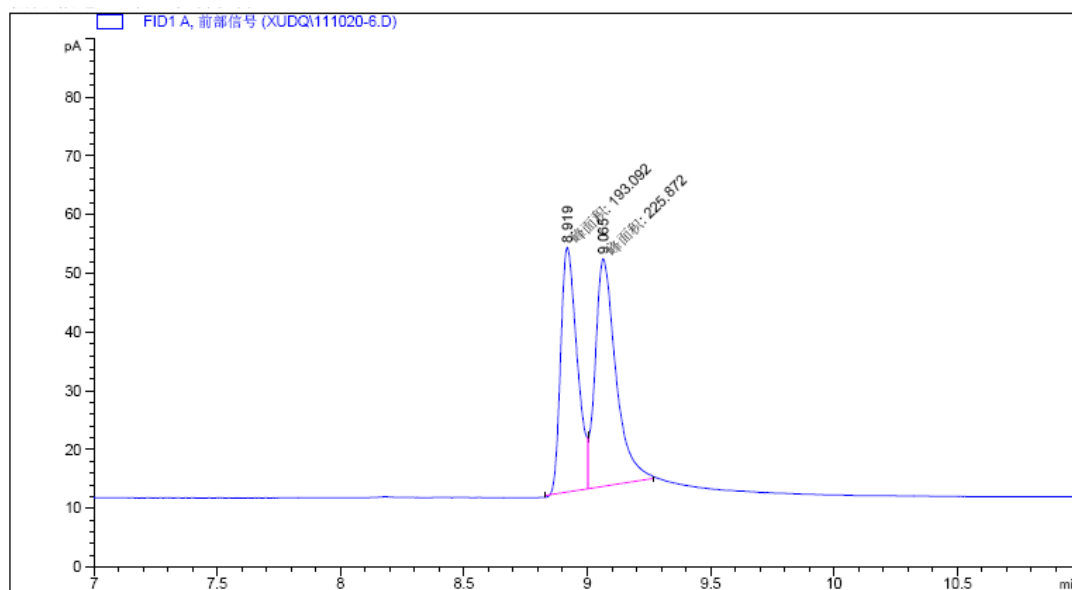

| 峰 # | 保留时间 [min] | 类型 | 峰宽 [min] | 峰面积 [pA*s] | 峰高 [pA]  | 峰面积 %    |
|-----|------------|----|----------|------------|----------|----------|
| 1   | 8.919      | MF | 0.0772   | 193.09190  | 41.68716 | 46.08792 |
| 2   | 9.065      | FM | 0.0972   | 225.87234  | 38.73124 | 53.91208 |

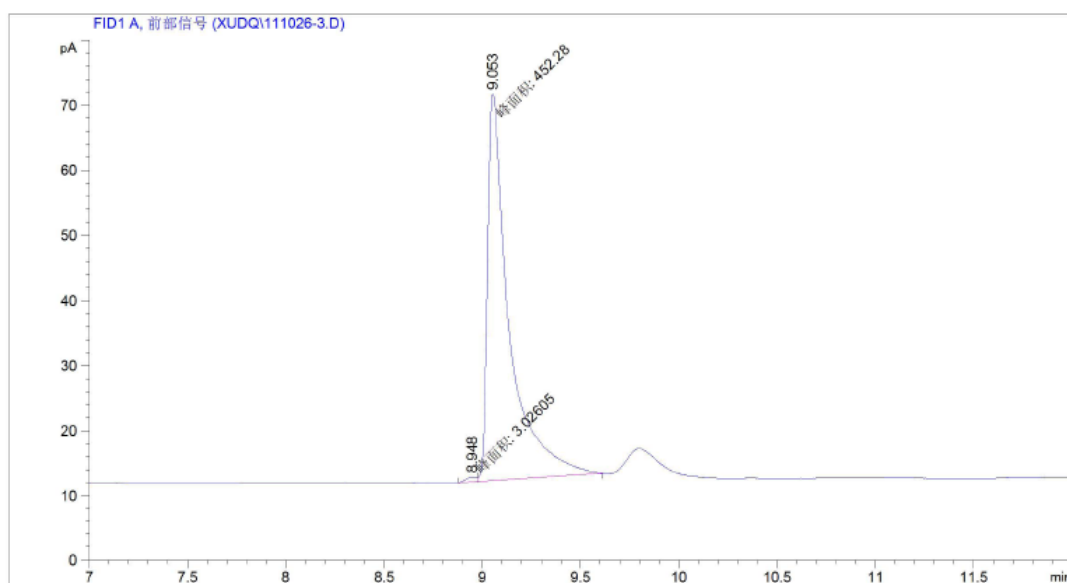

| 峰 # | 保留时间 [min] | 类型 | 峰宽 [min] | 峰面积 [pA*s] | 峰高 [pA]    | 峰面积 %    |
|-----|------------|----|----------|------------|------------|----------|
| 1   | 8.948      | MF | 0.0642   | 3.02605    | 7.85034e-1 | 0.66462  |
| 2   | 9.053      | FM | 0.1271   | 452.27972  | 59.32846   | 99.33538 |

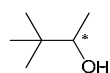

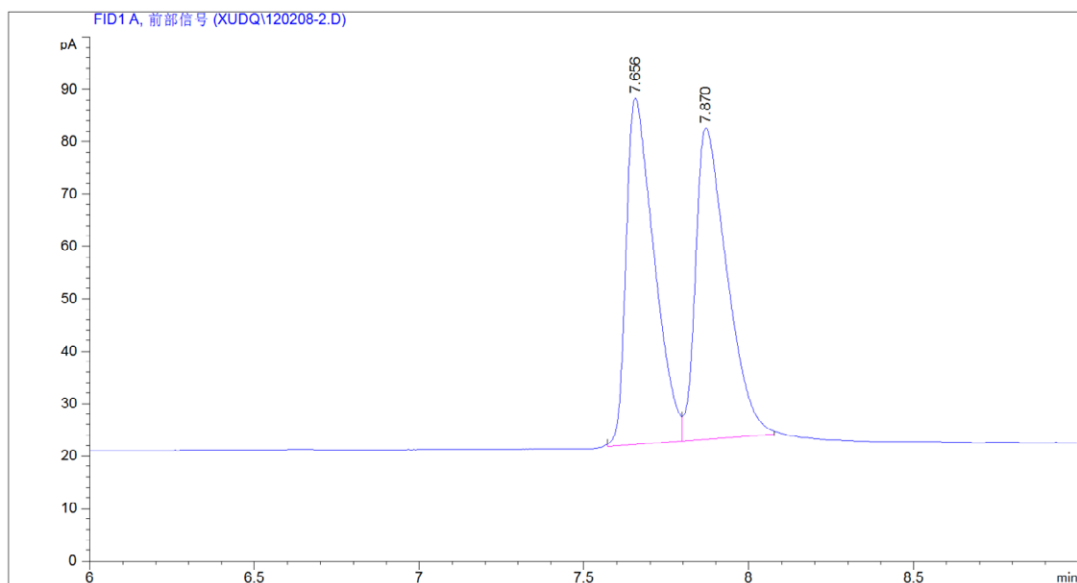

| 峰 # | 保留时间 [min] | 类型 | 峰宽 [min] | 峰面积 [pA*s] | 峰高 [pA]  | 峰面积 %    |
|-----|------------|----|----------|------------|----------|----------|
| 1   | 7.656      | BV | 0.0857   | 389.11649  | 66.10107 | 49.64502 |
| 2   | 7.870      | VB | 0.0954   | 394.68115  | 59.48867 | 50.35498 |

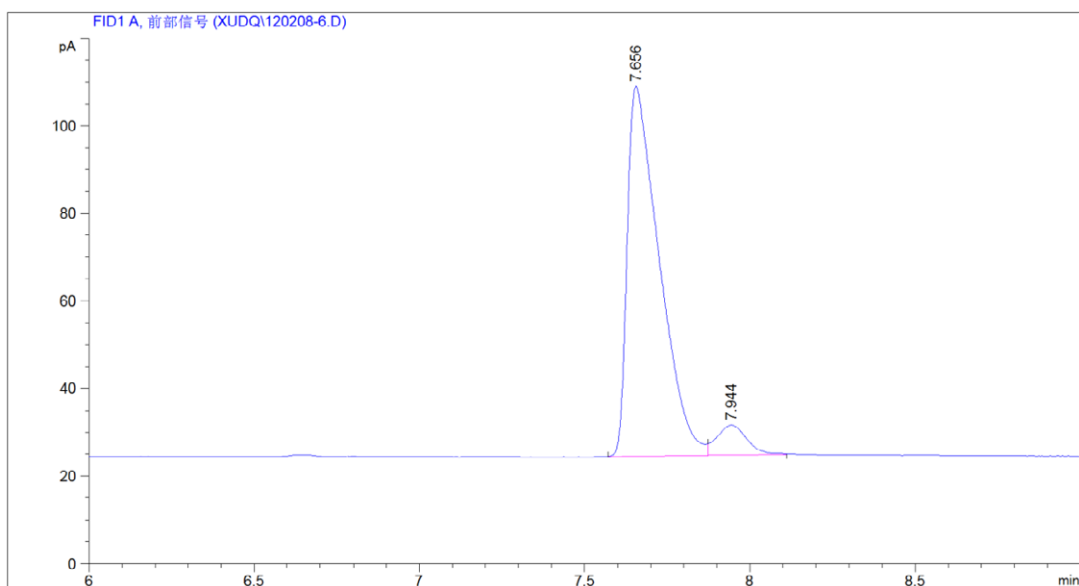

| 峰 # | 保留时间 [min] | 类型 | 峰宽 [min] | 峰面积 [pA*s] | 峰高 [pA]  | 峰面积 %    |
|-----|------------|----|----------|------------|----------|----------|
| 1   | 7.656      | BB | 0.0924   | 567.68628  | 84.44694 | 93.03597 |
| 2   | 7.944      | BB | 0.0958   | 42.49307   | 6.81270  | 6.96403  |

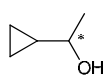

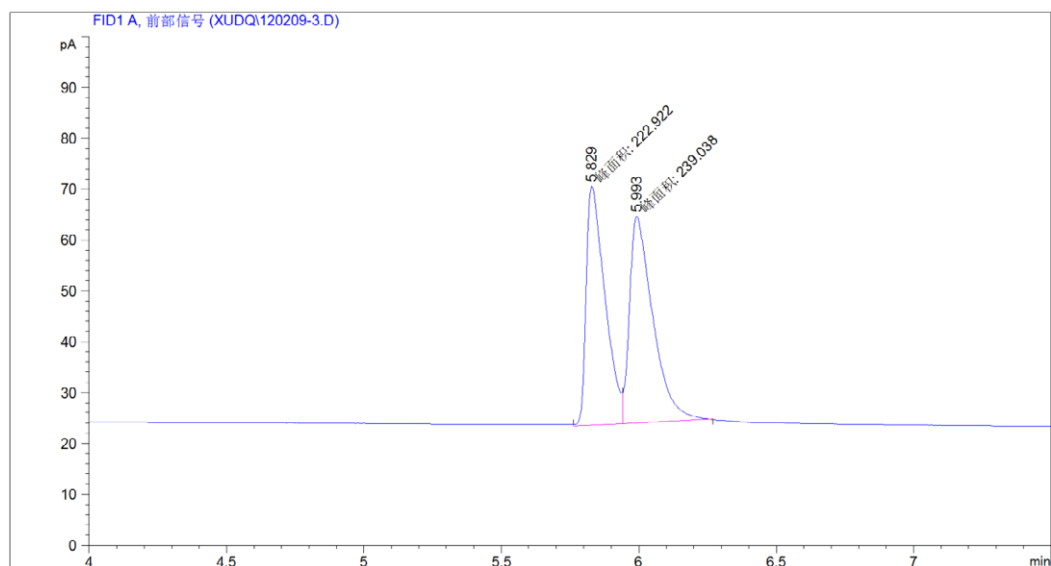

| 峰 # | 保留时间 [min] | 类型 | 峰宽 [min] | 峰面积 [pA*s] | 峰高 [pA]  | 峰面积 %    |
|-----|------------|----|----------|------------|----------|----------|
| 1   | 5.829      | MF | 0.0790   | 222.92249  | 47.04689 | 48.25574 |
| 2   | 5.993      | FM | 0.0980   | 239.03812  | 40.63602 | 51.74426 |

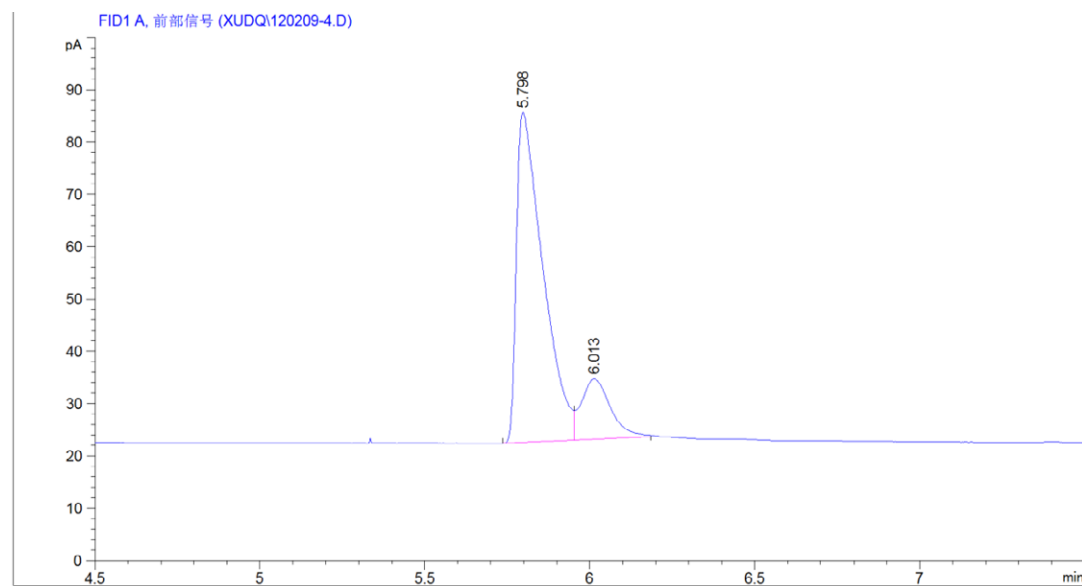

| 峰 # | 保留时间 [min] | 类型 | 峰宽 [min] | 峰面积 [pA*s] | 峰高 [pA]  | 峰面积 %    |
|-----|------------|----|----------|------------|----------|----------|
| 1   | 5.798      | BV | 0.0770   | 351.78360  | 63.13416 | 83.22714 |
| 2   | 6.013      | VB | 0.0929   | 70.89536   | 11.49612 | 16.77286 |

#### 4. NMR chart of substituents.

2a

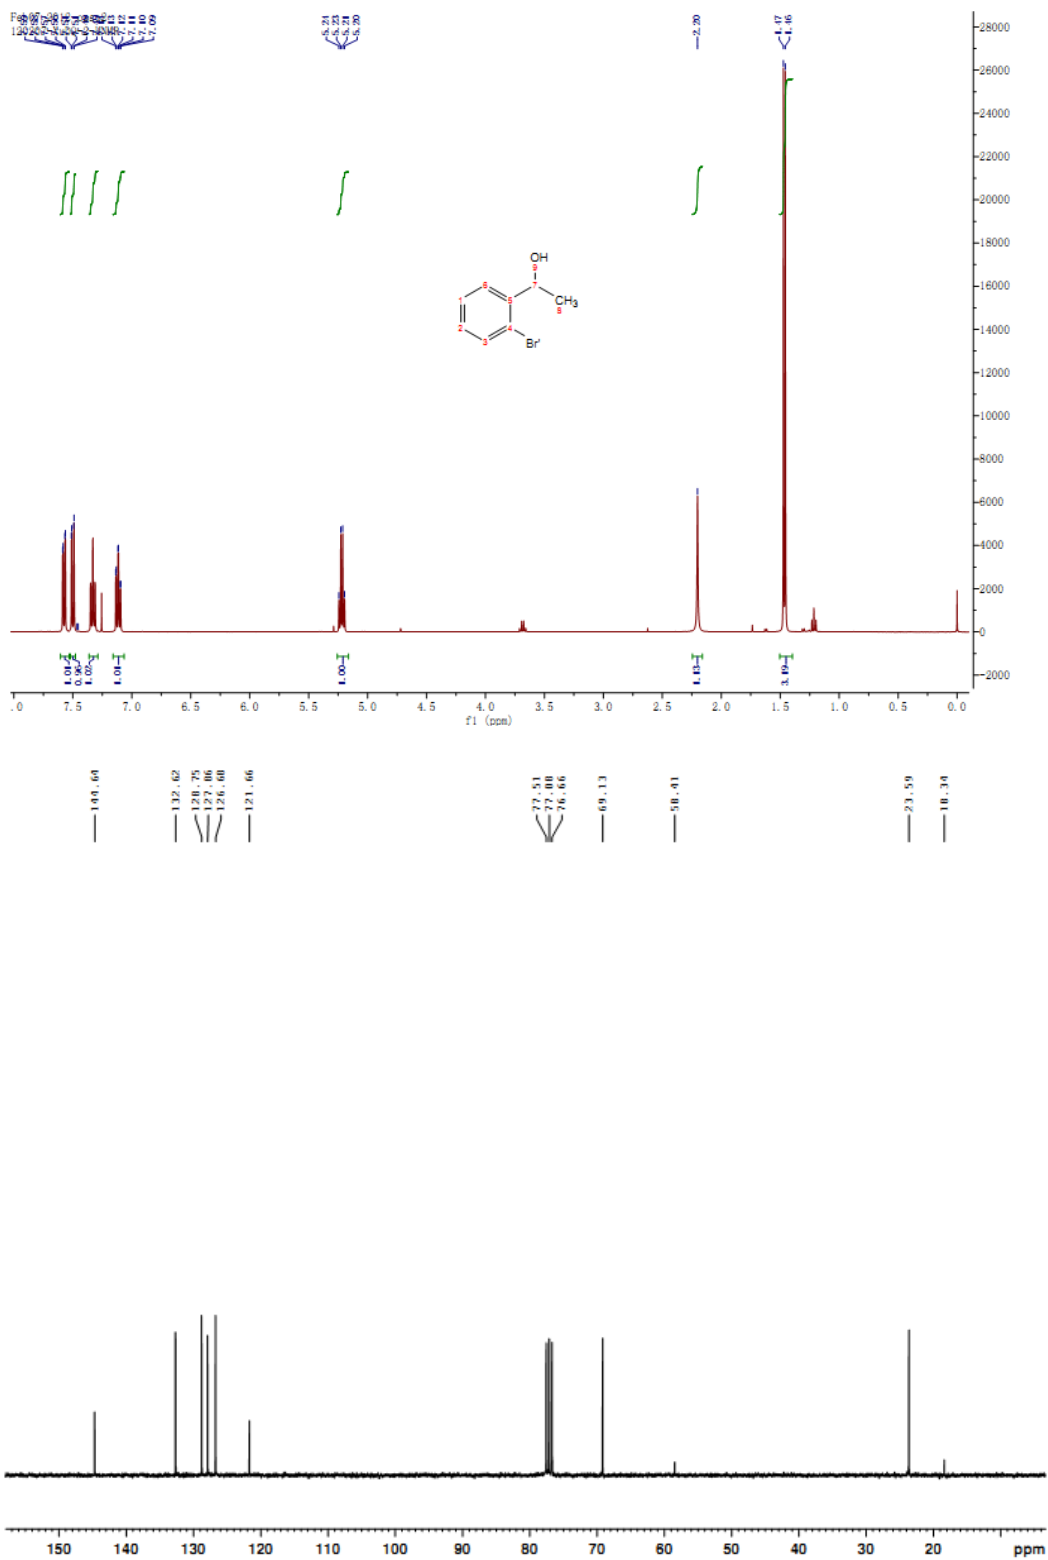

2b

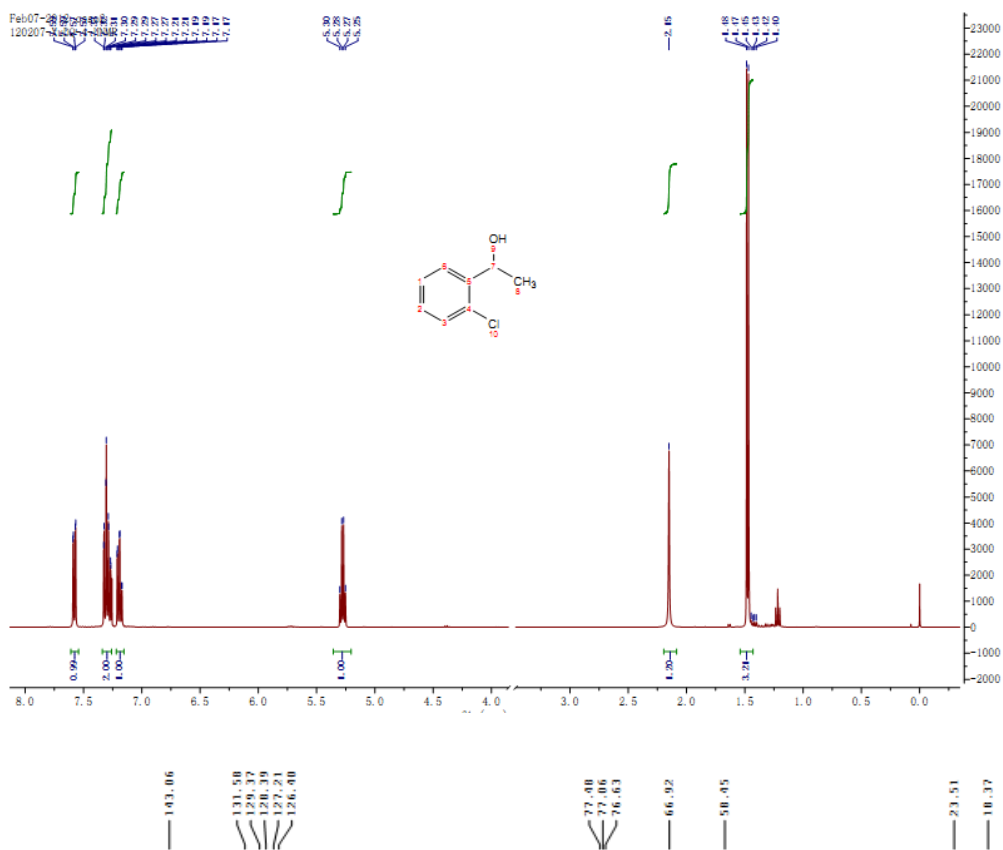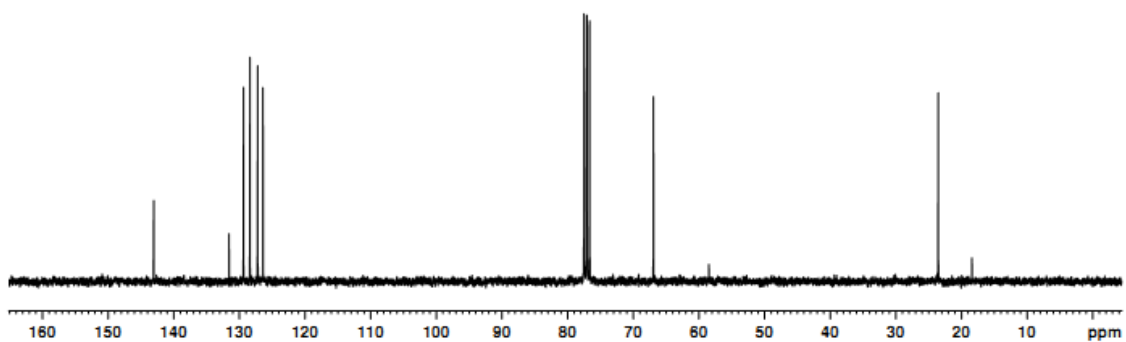

2c

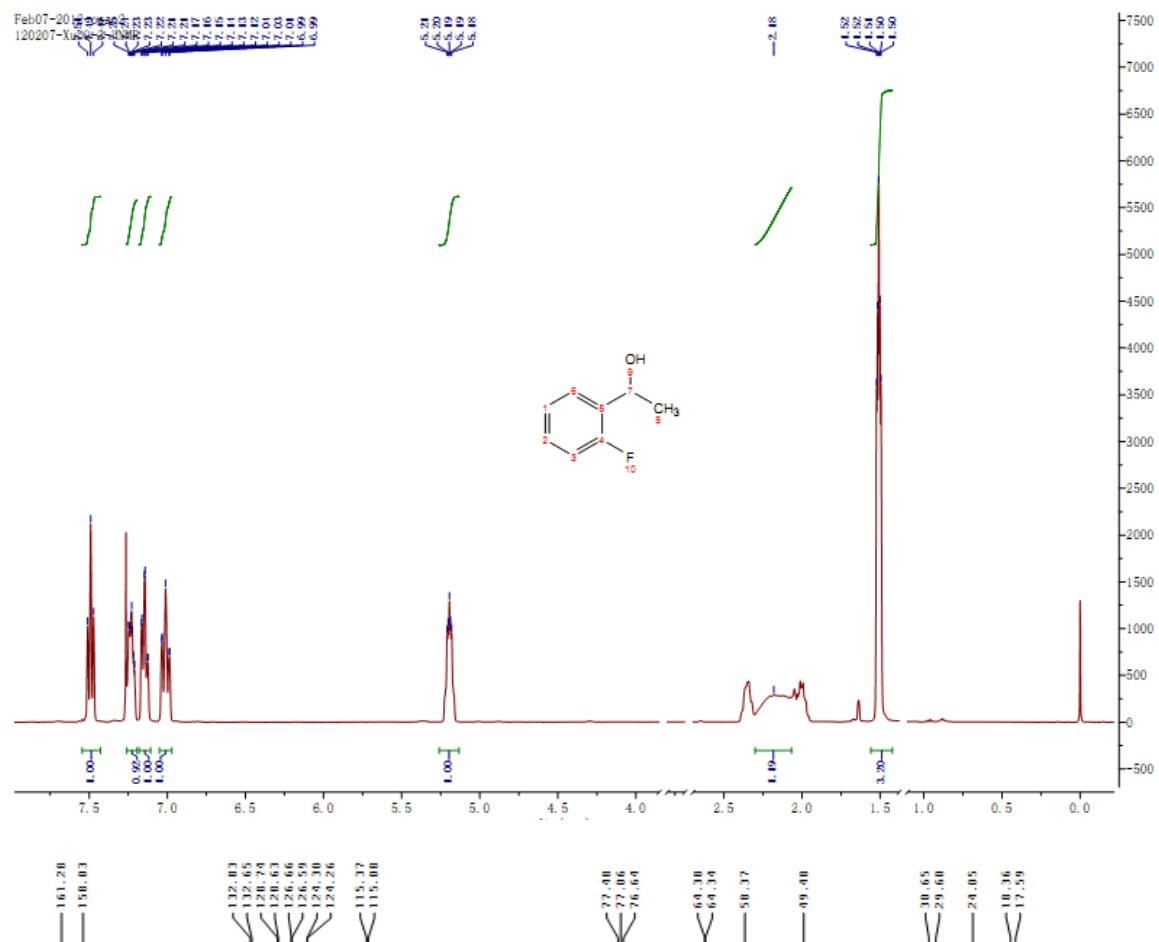

2d

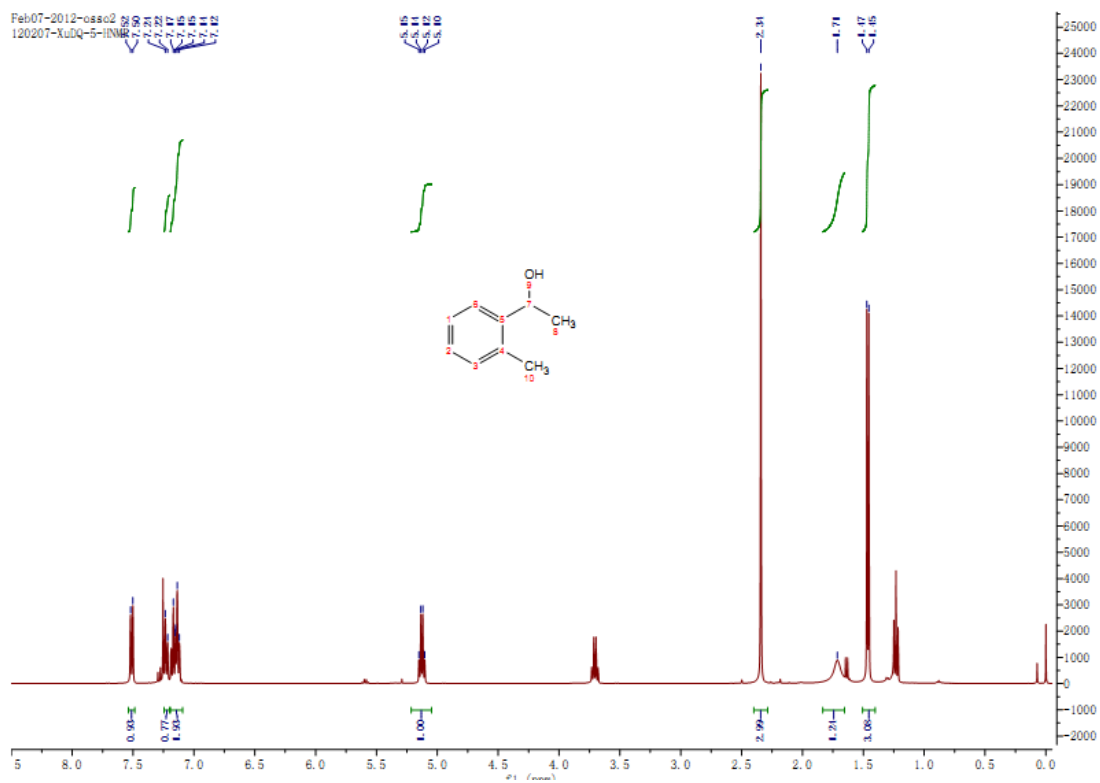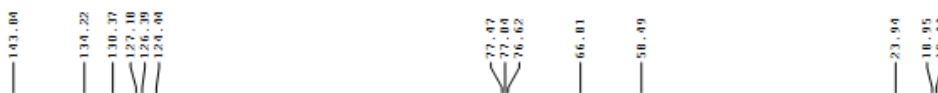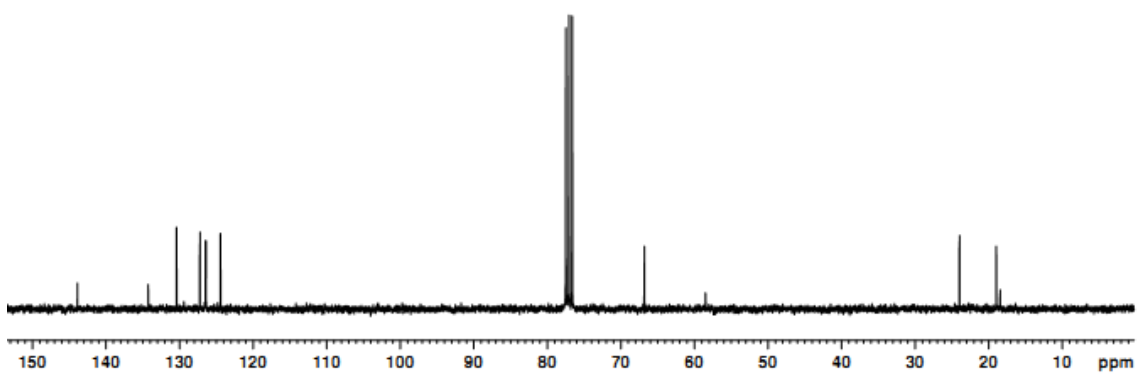

2e



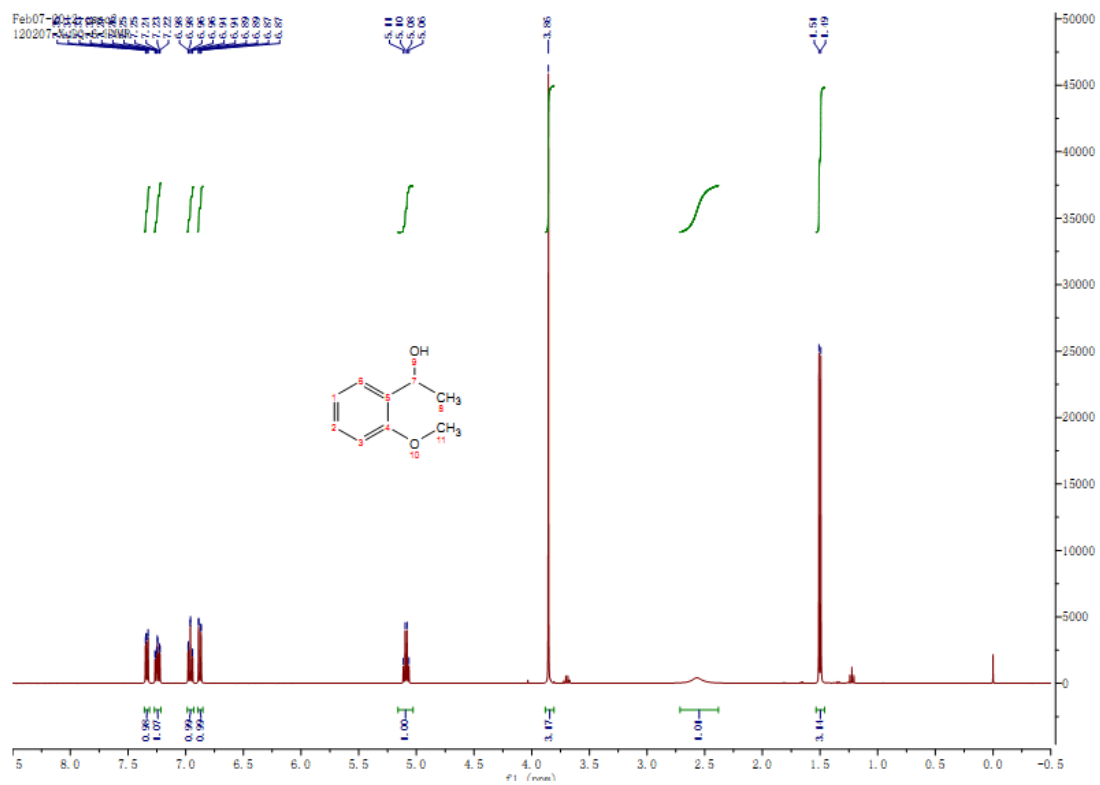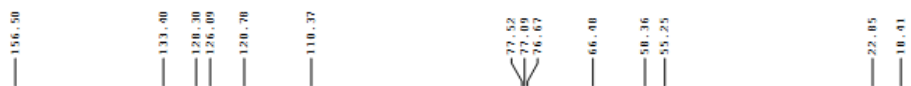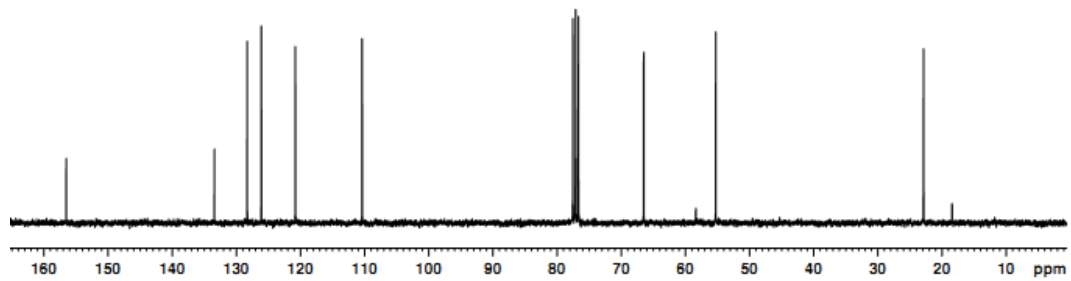

2f



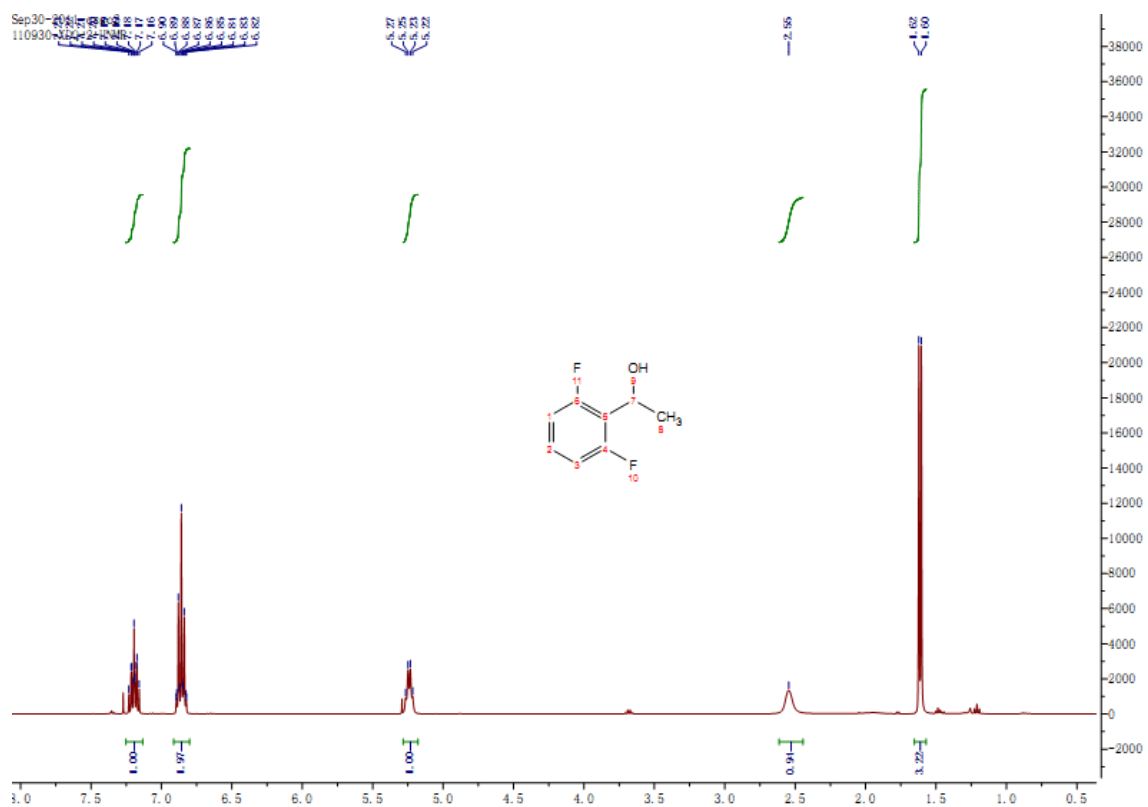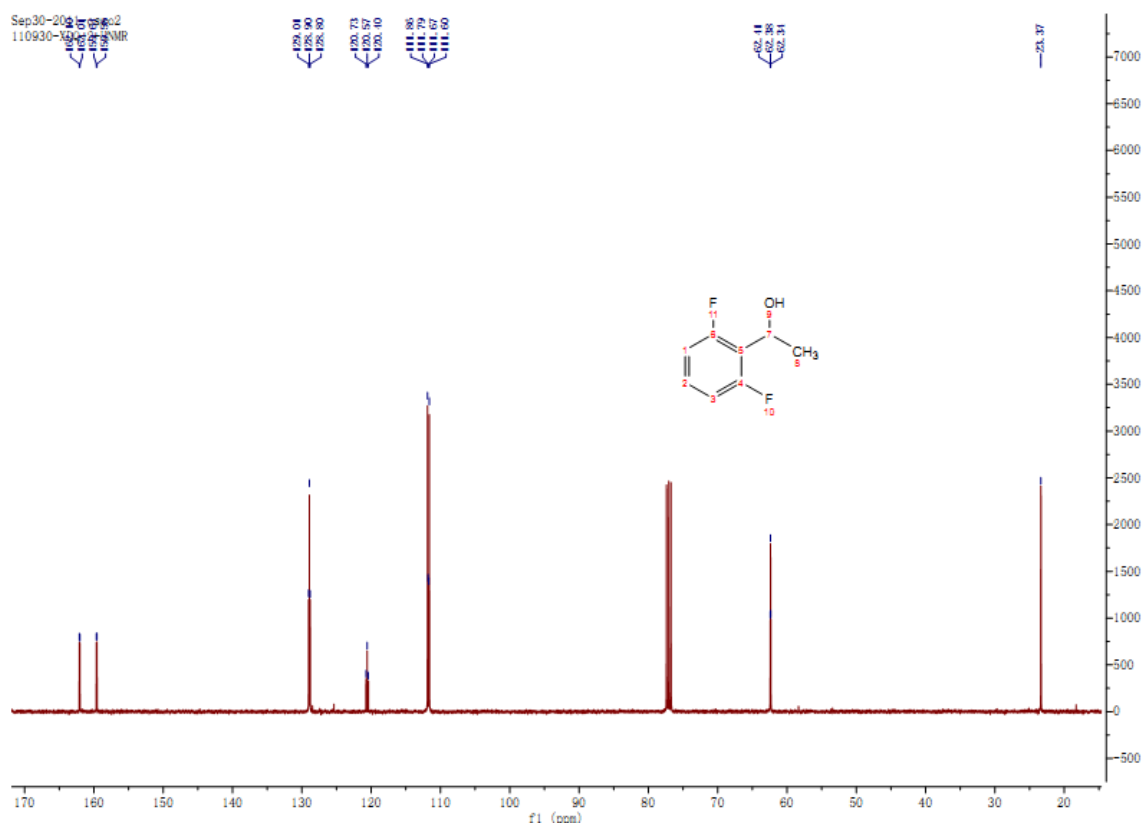

2h

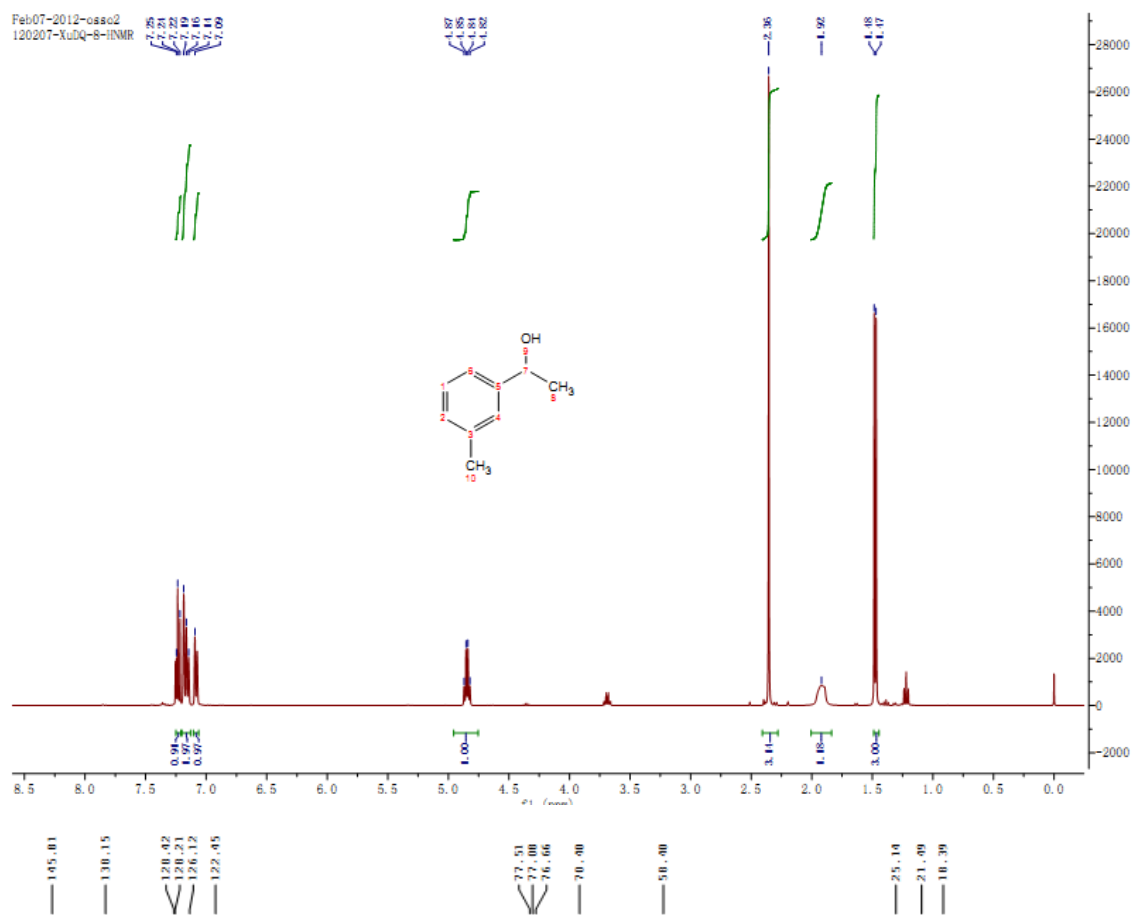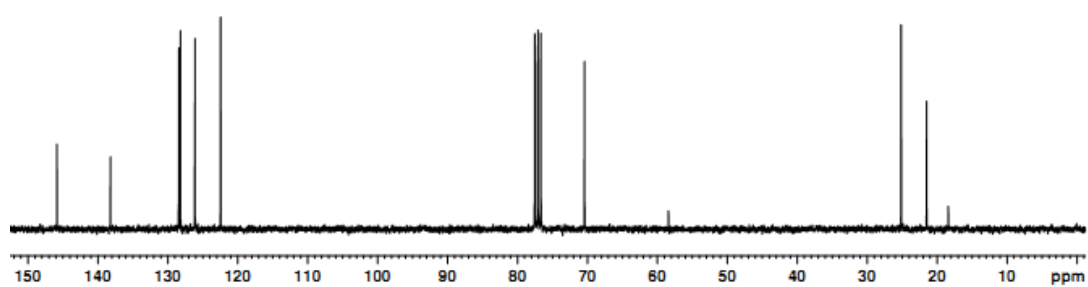

2i

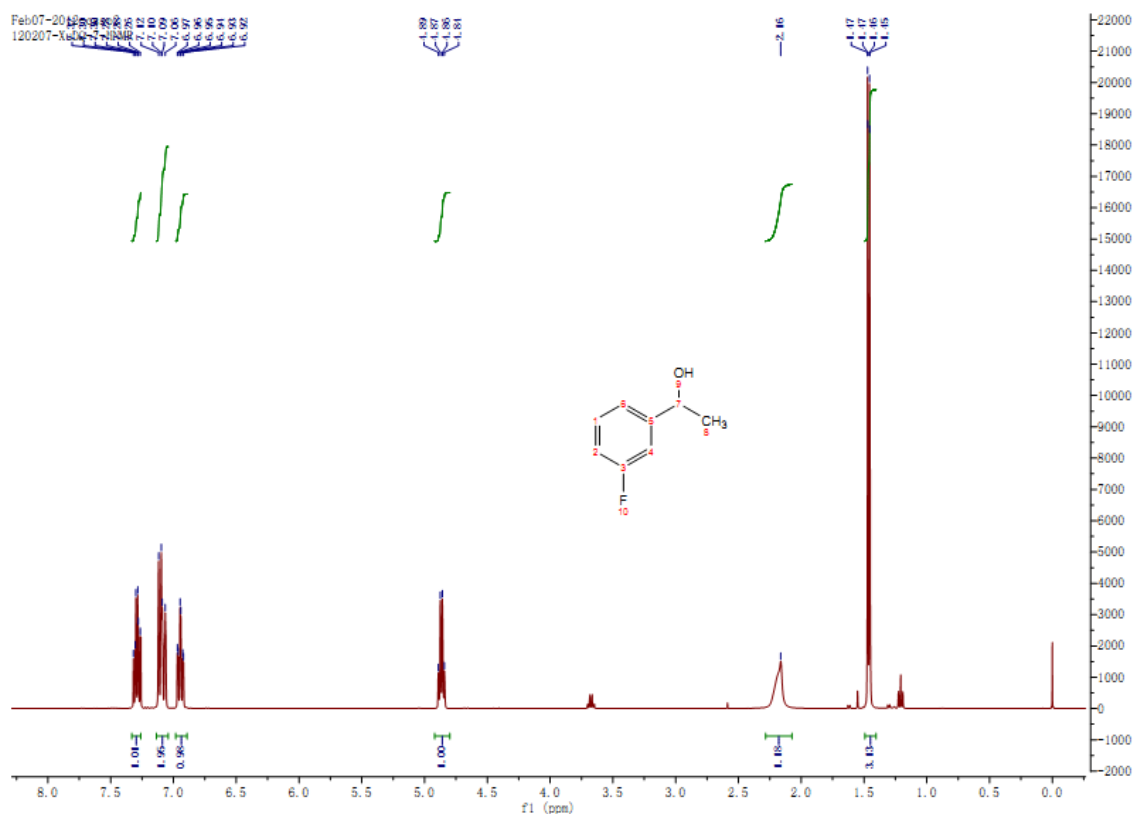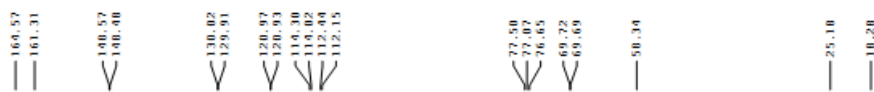

2j

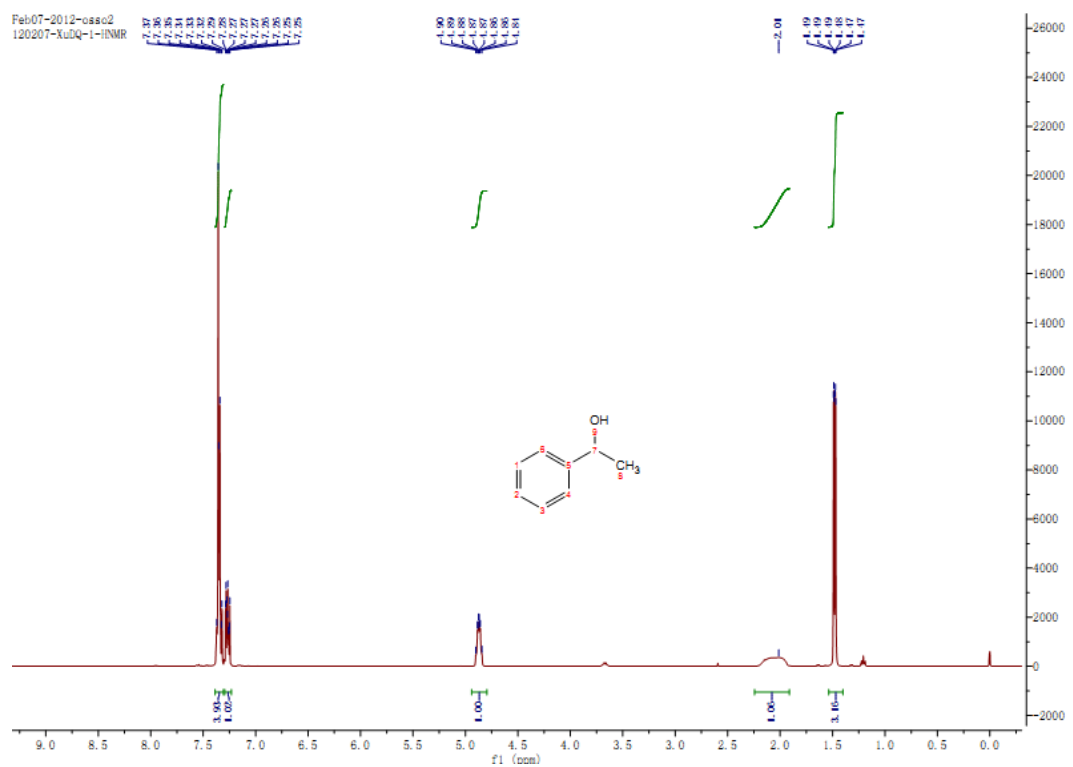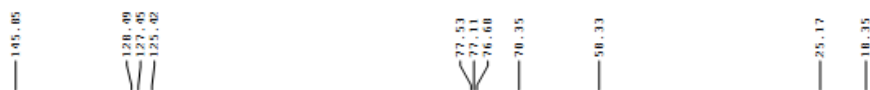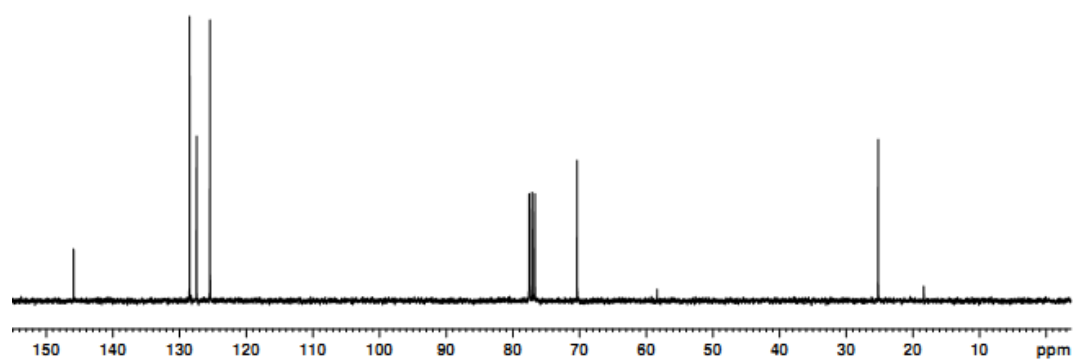

2k

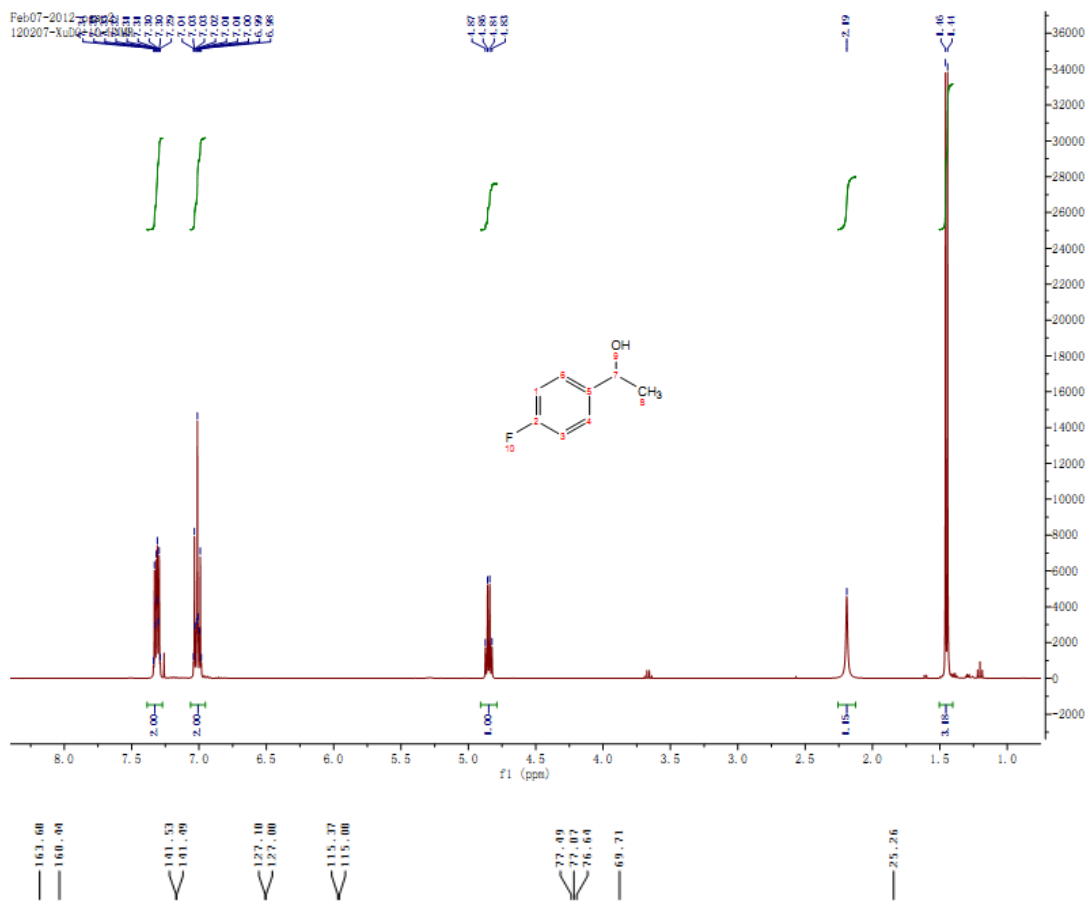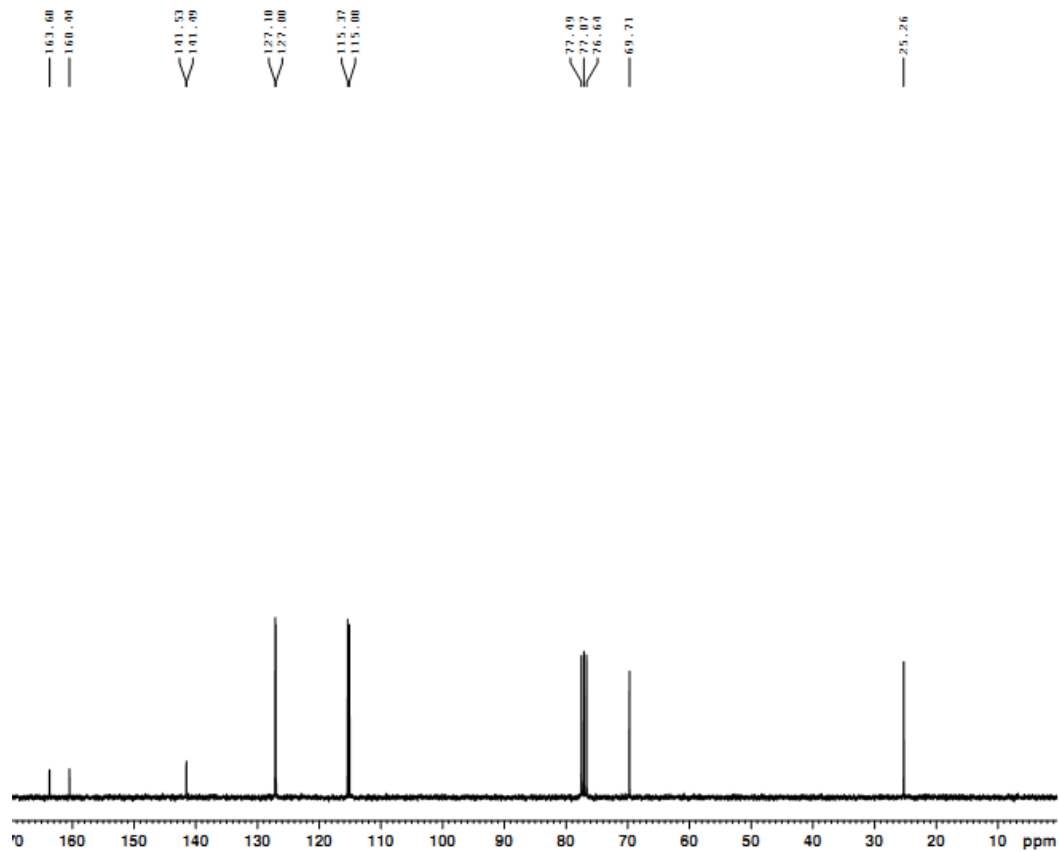

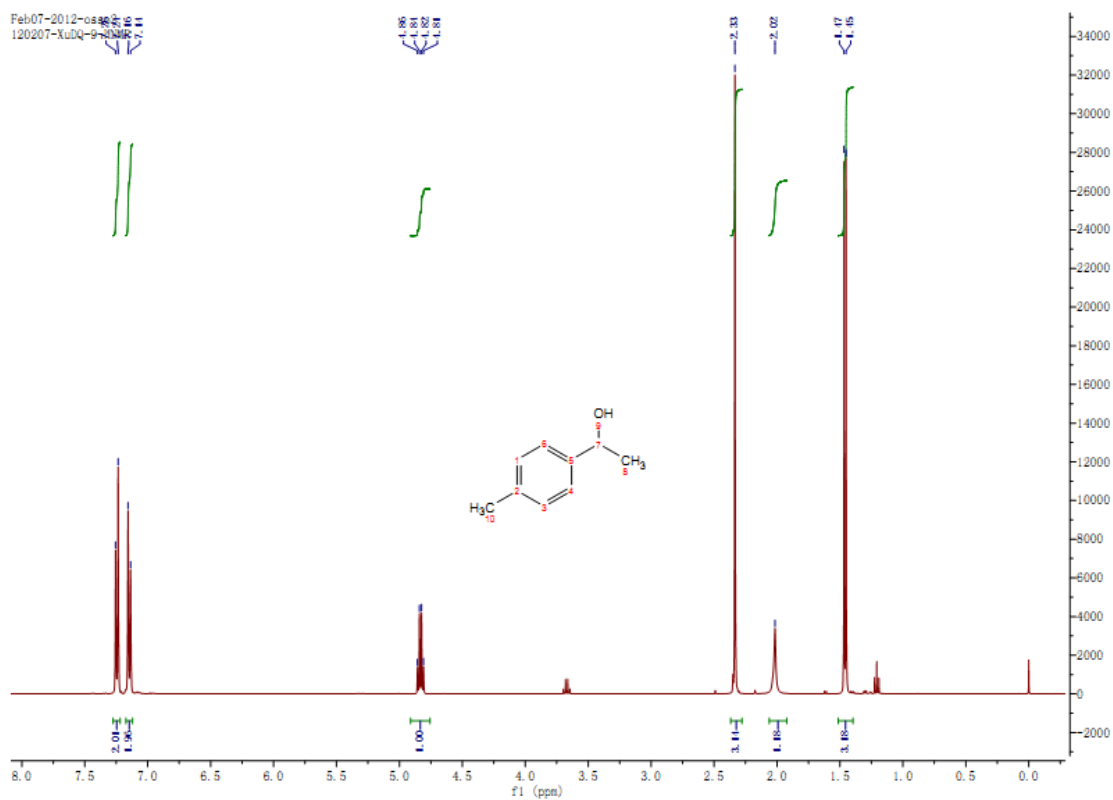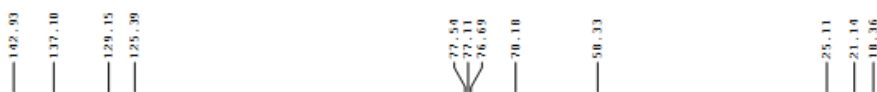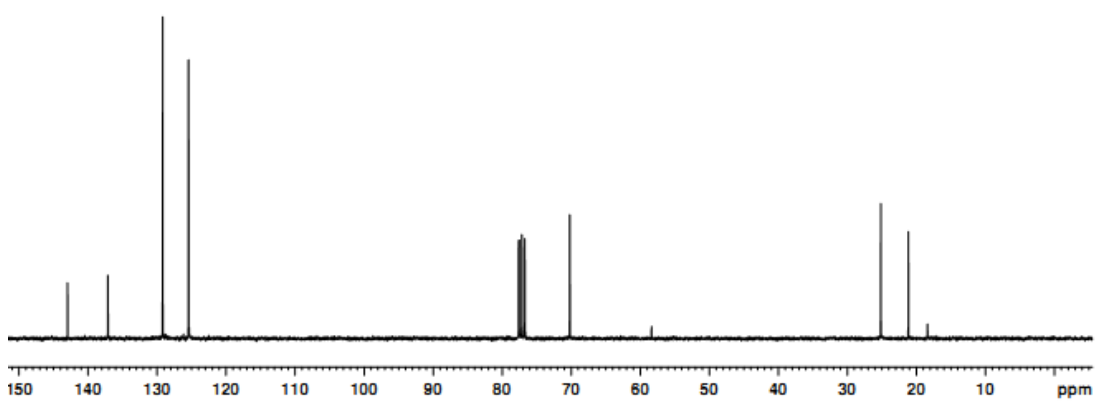

2m



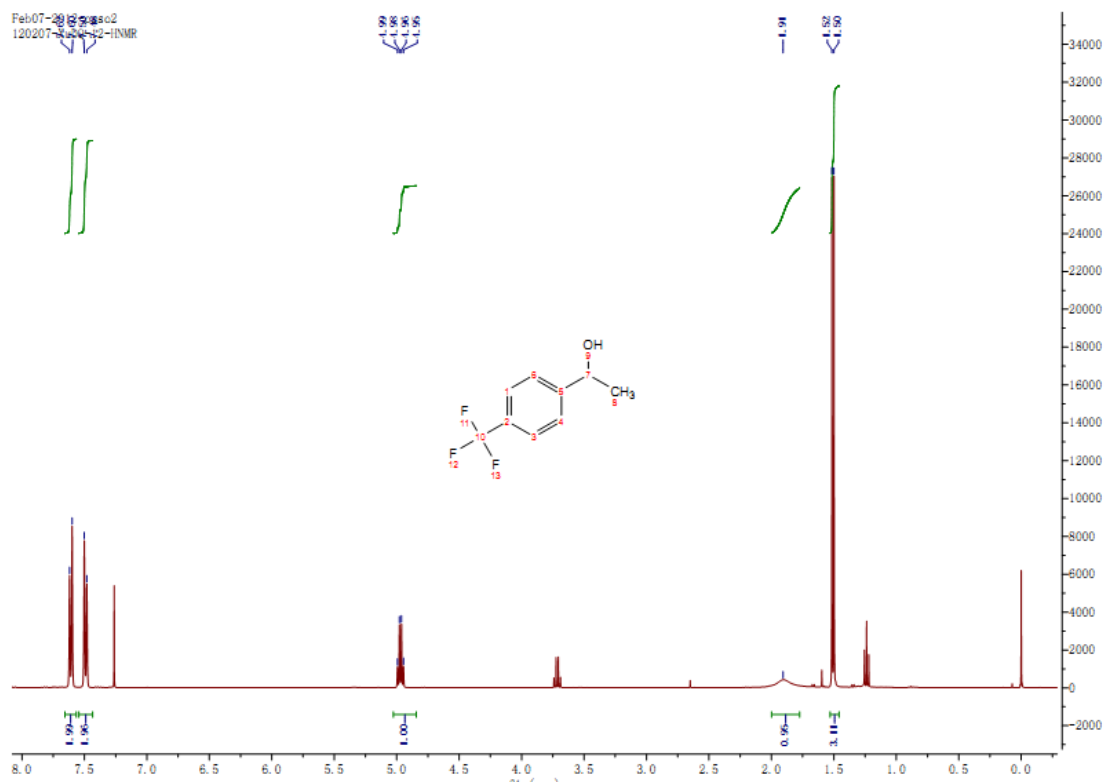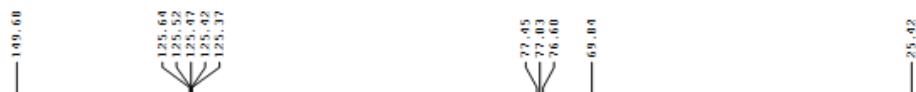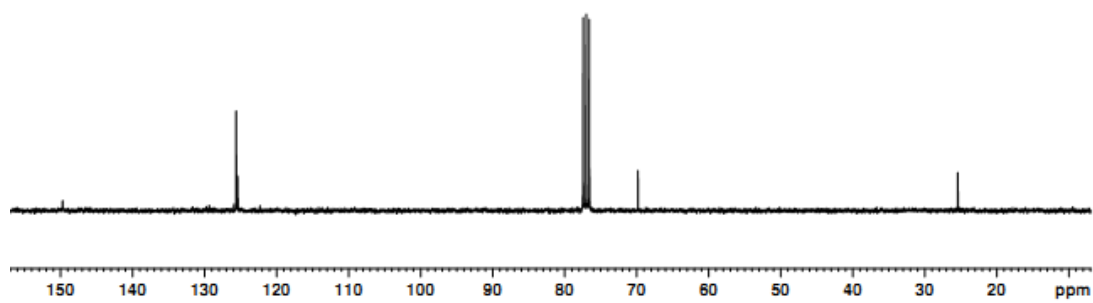

2n

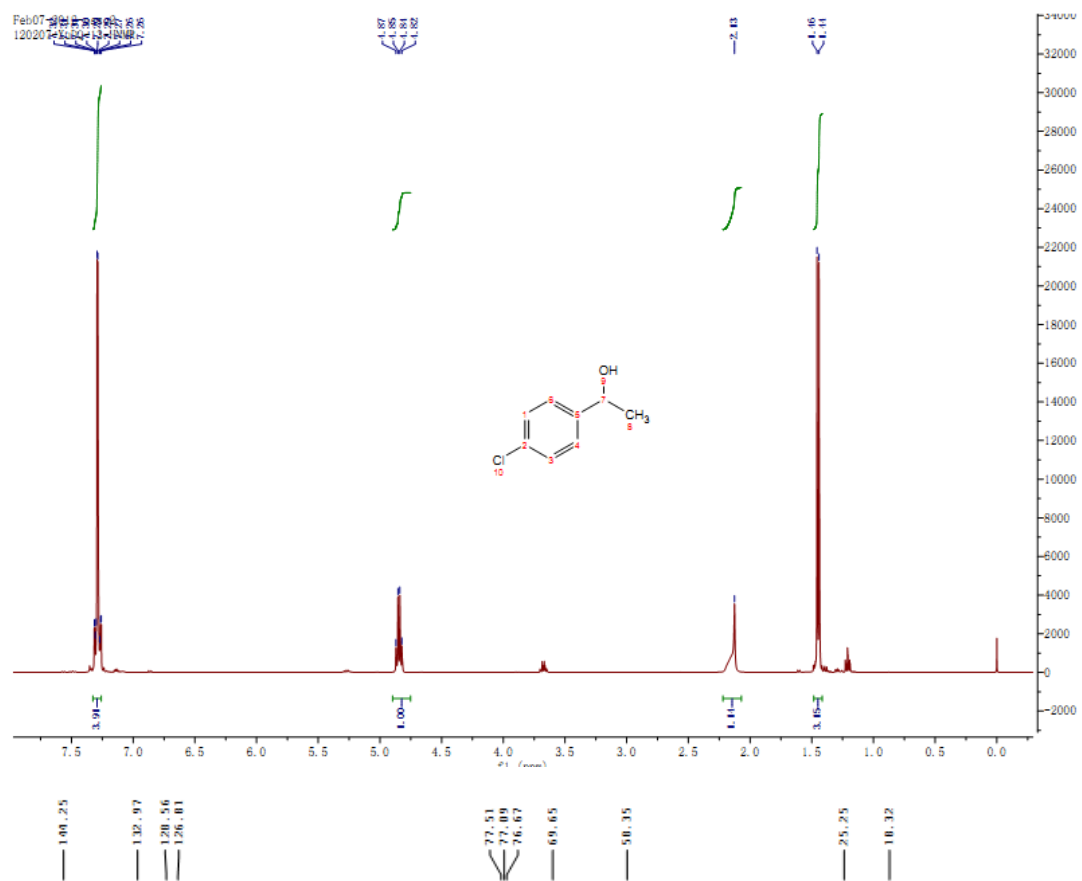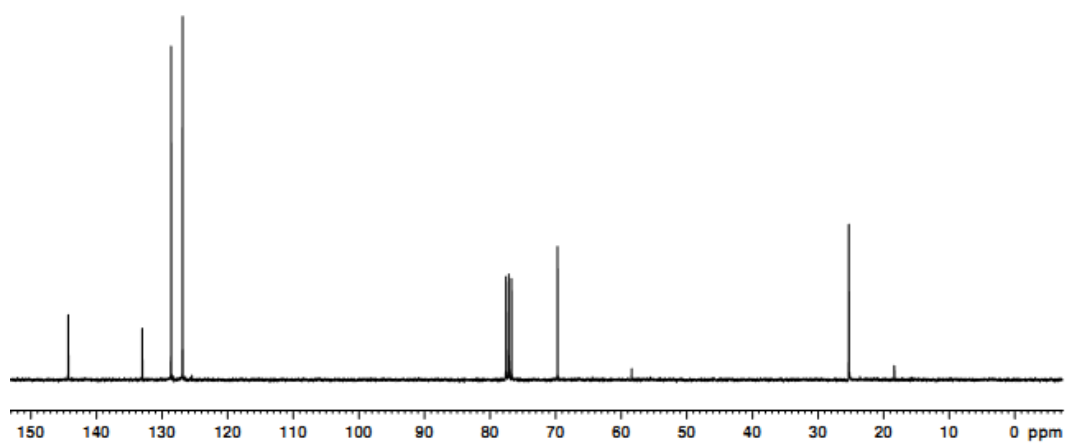

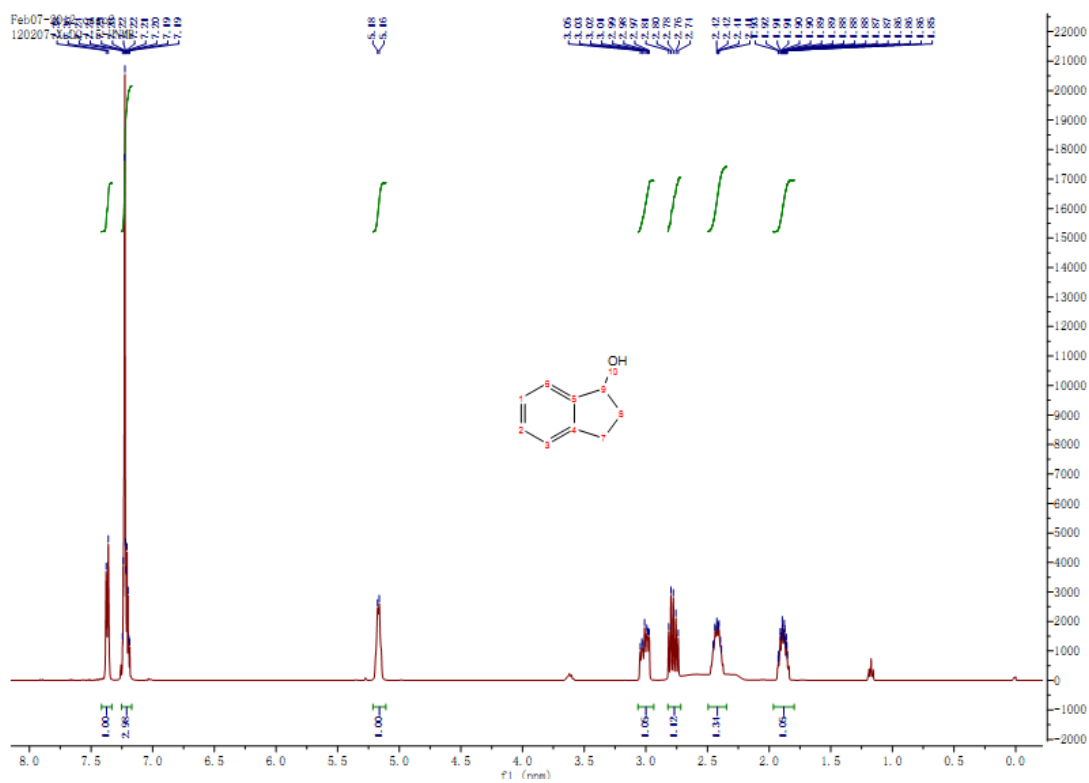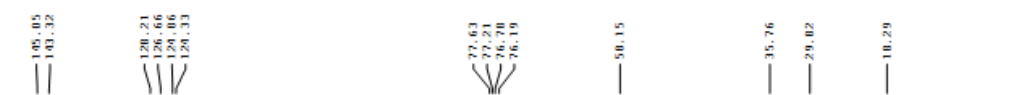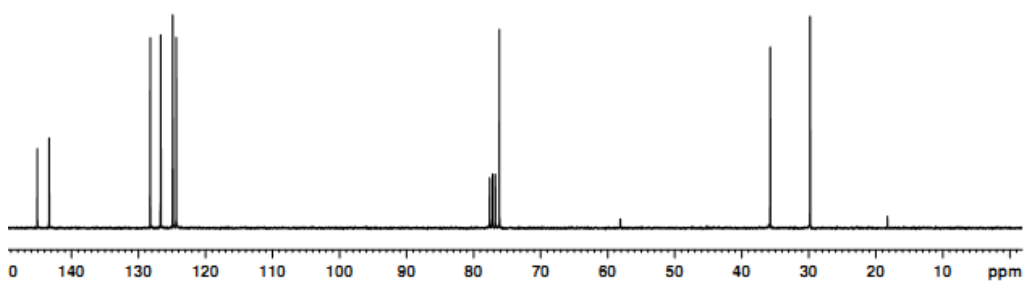

2p

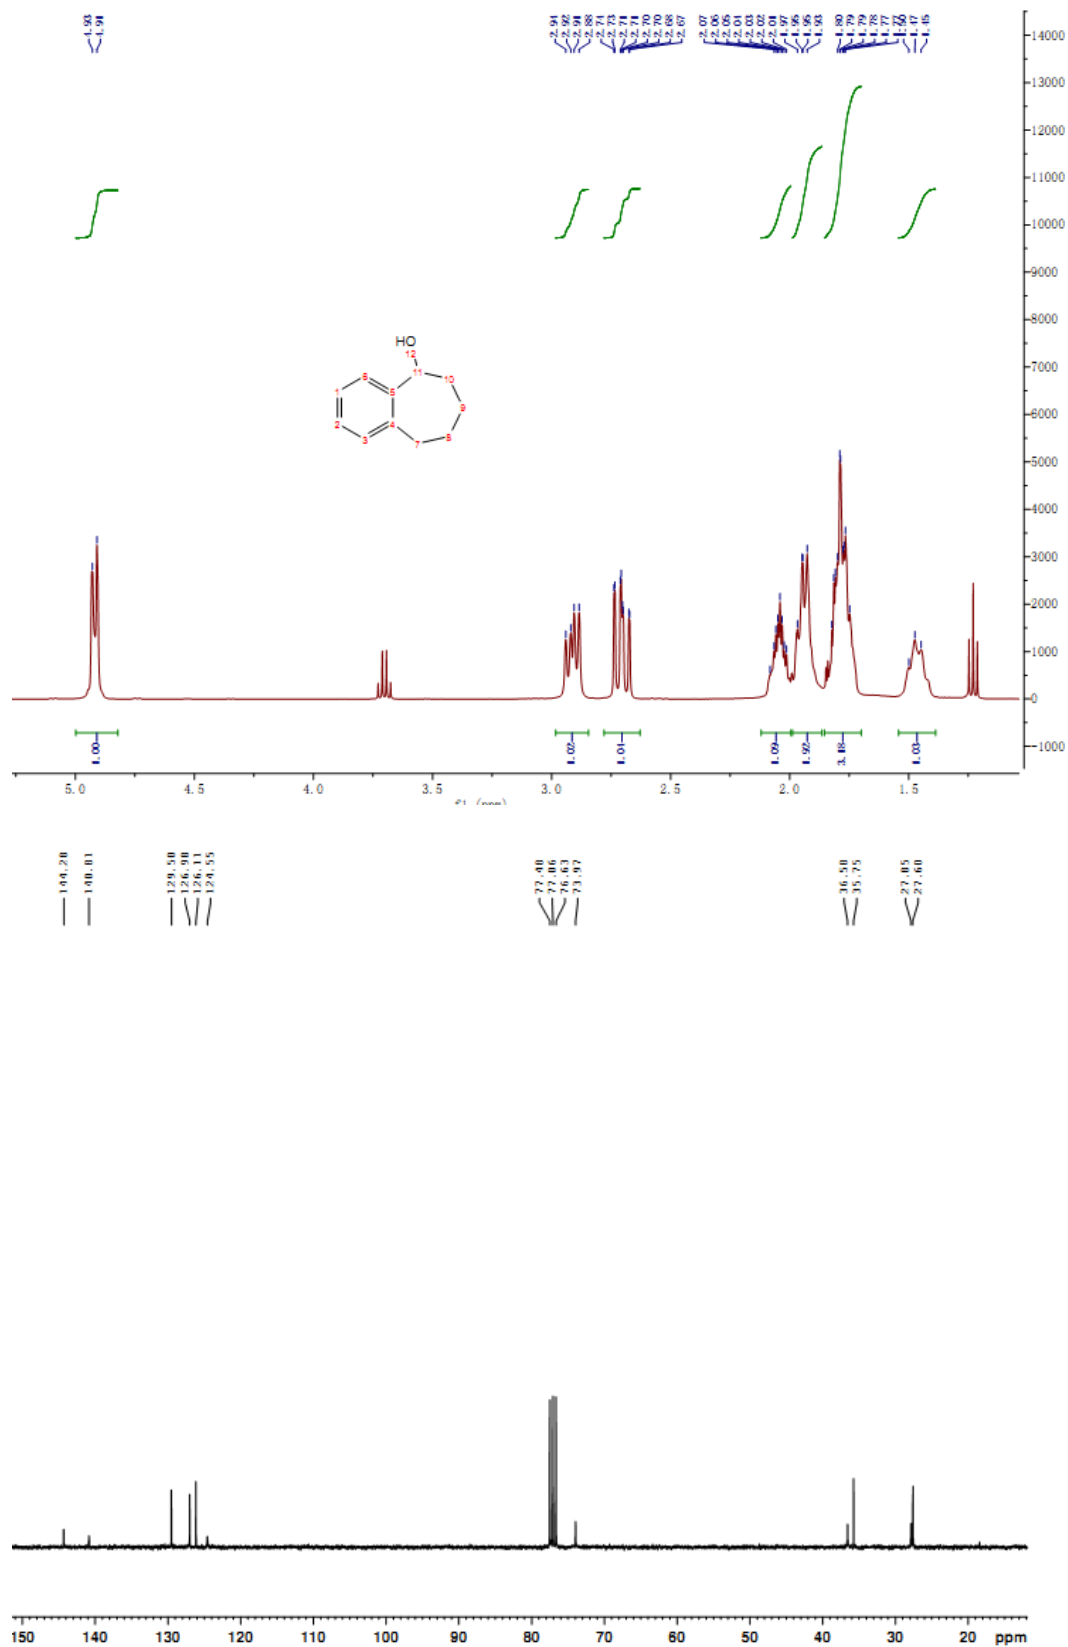

2q

Feb07-2012-osso2  
120207-XuDQ-16-1HMR

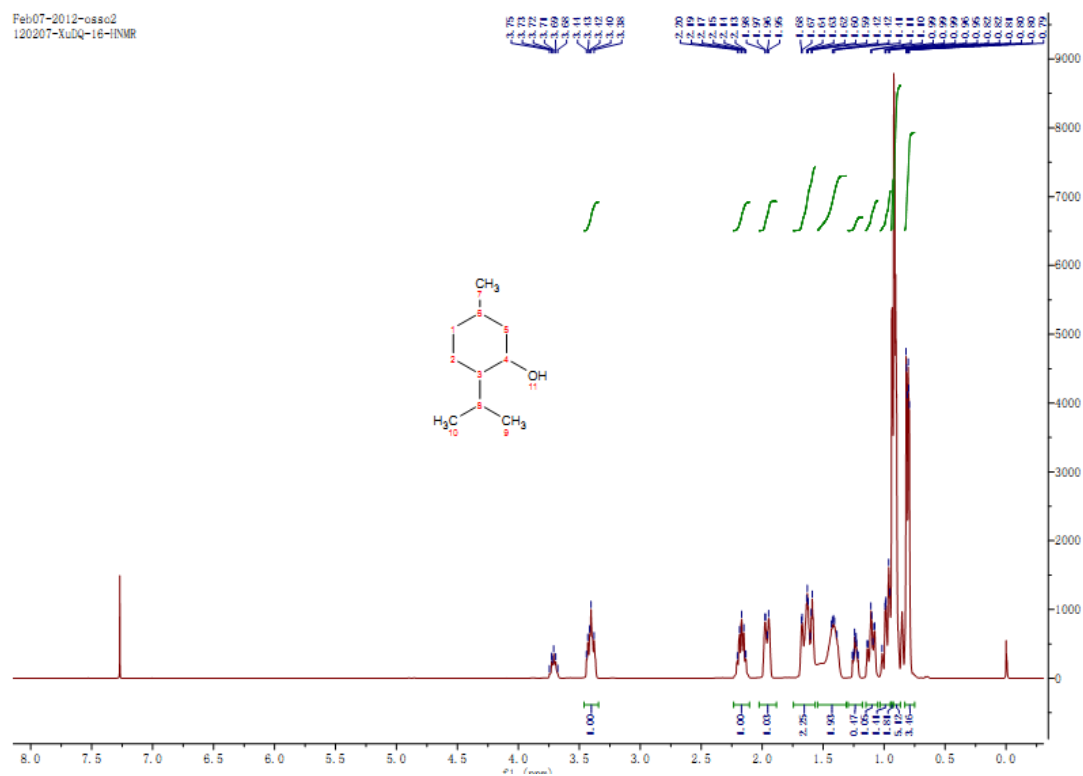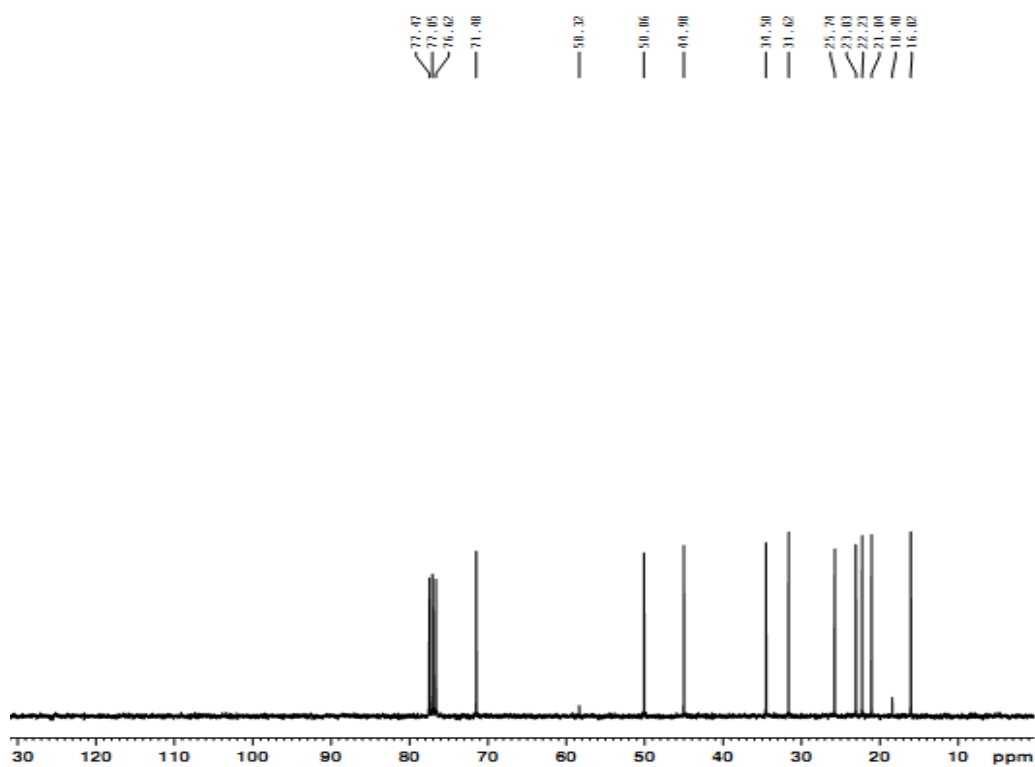

2r

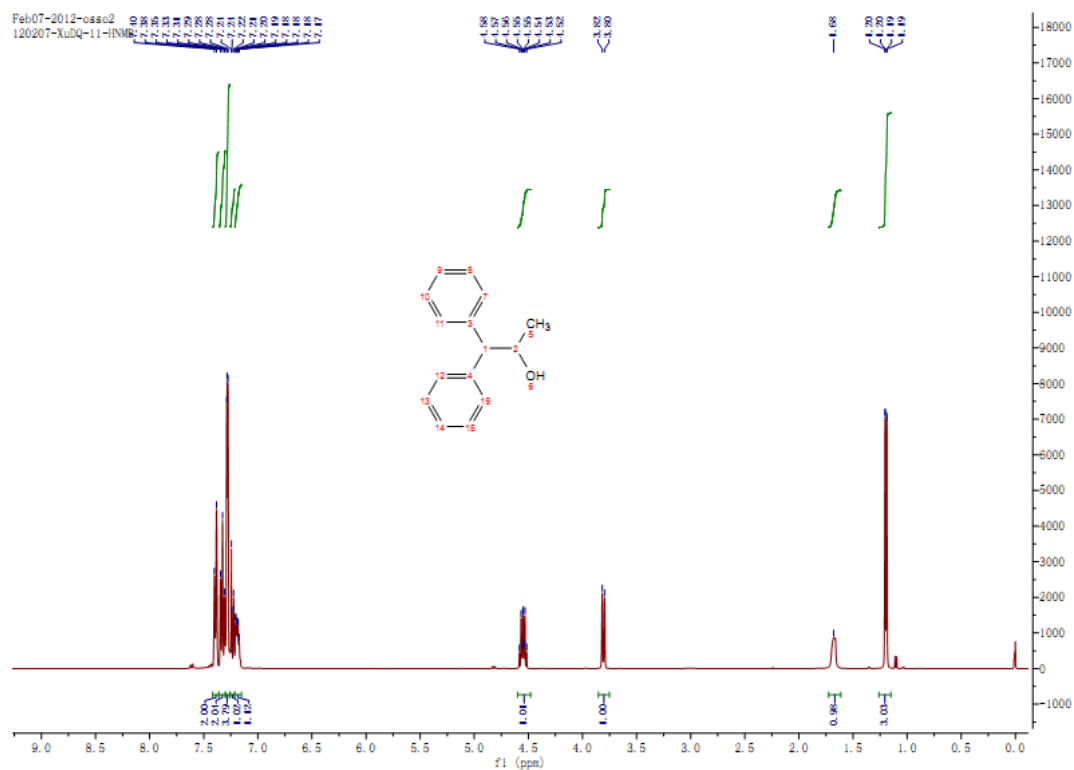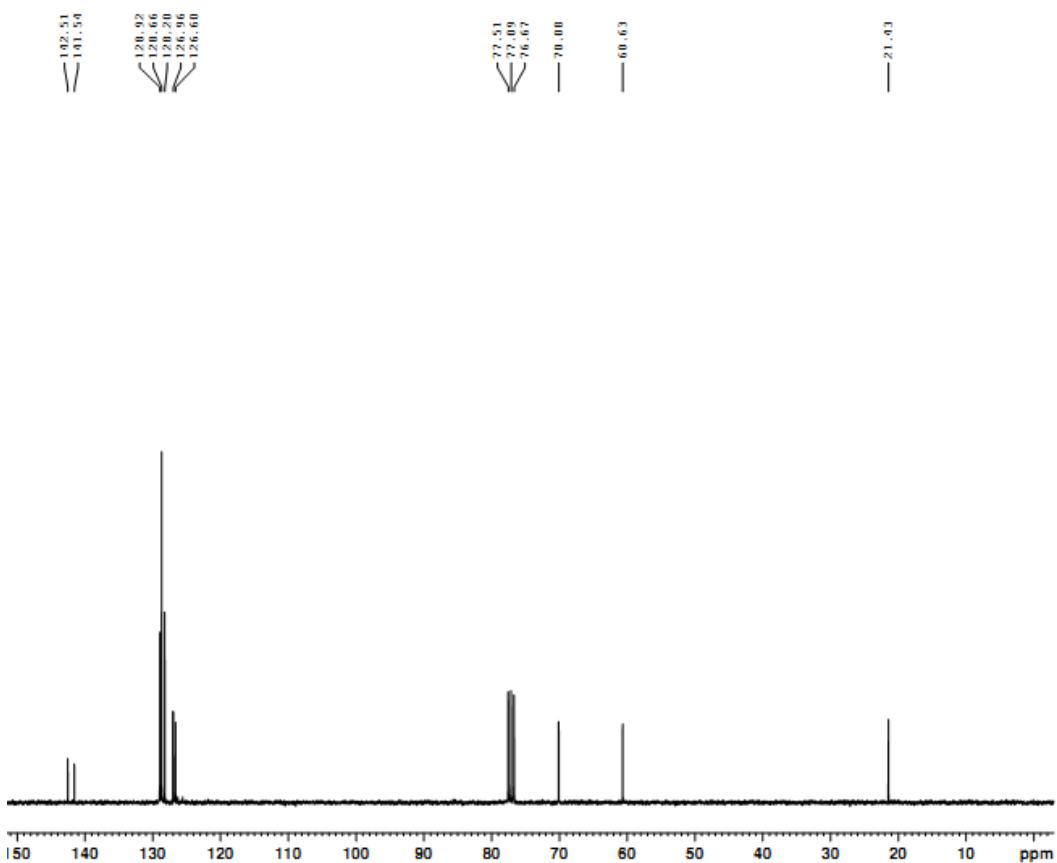

2s

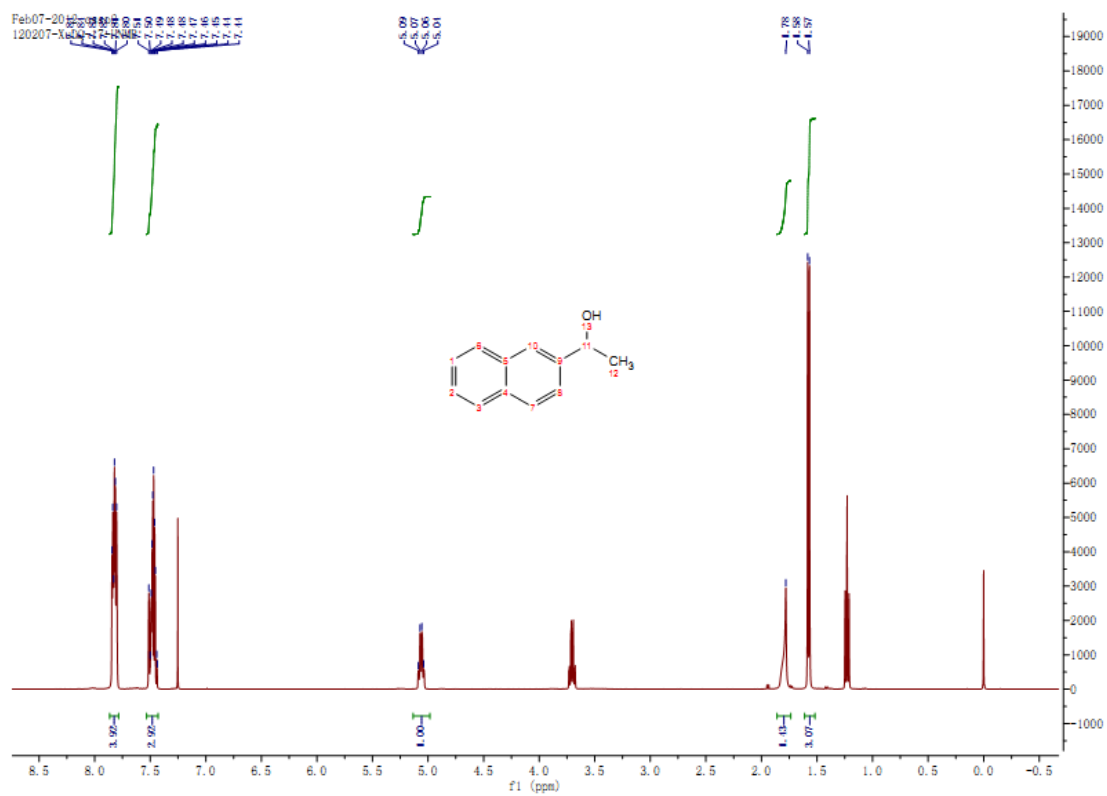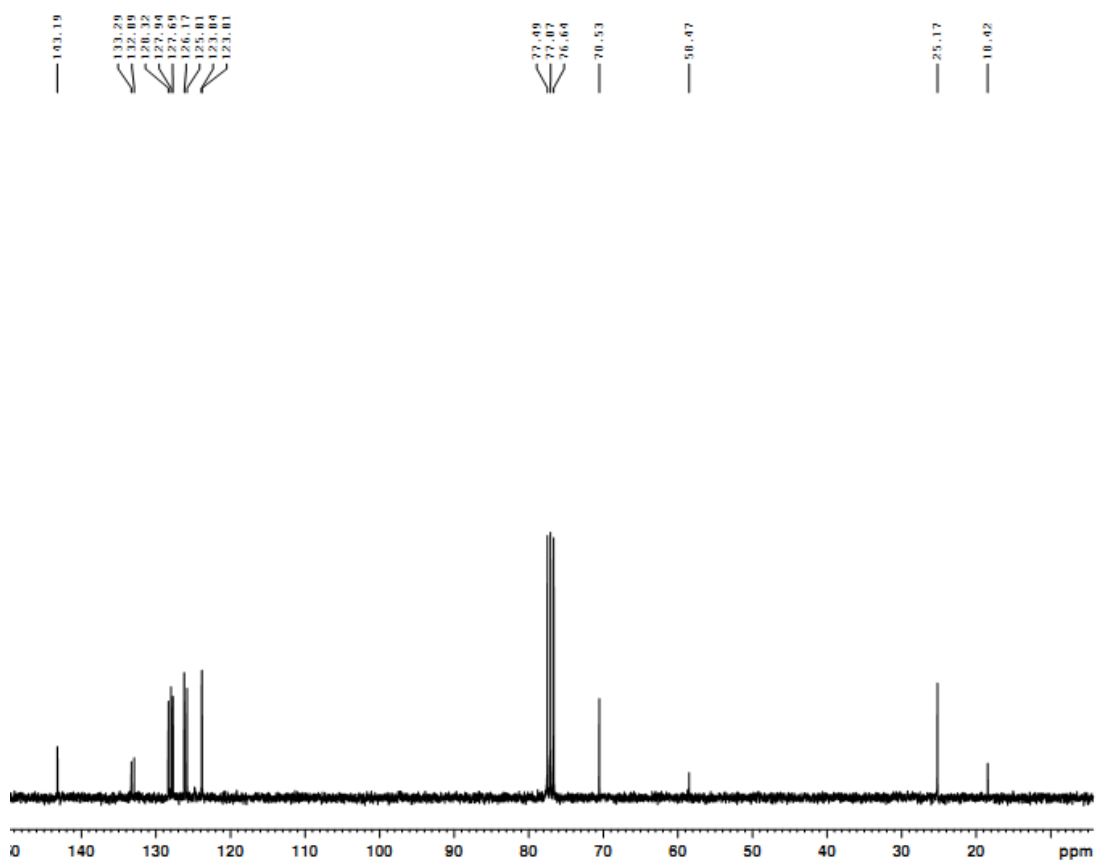

2t

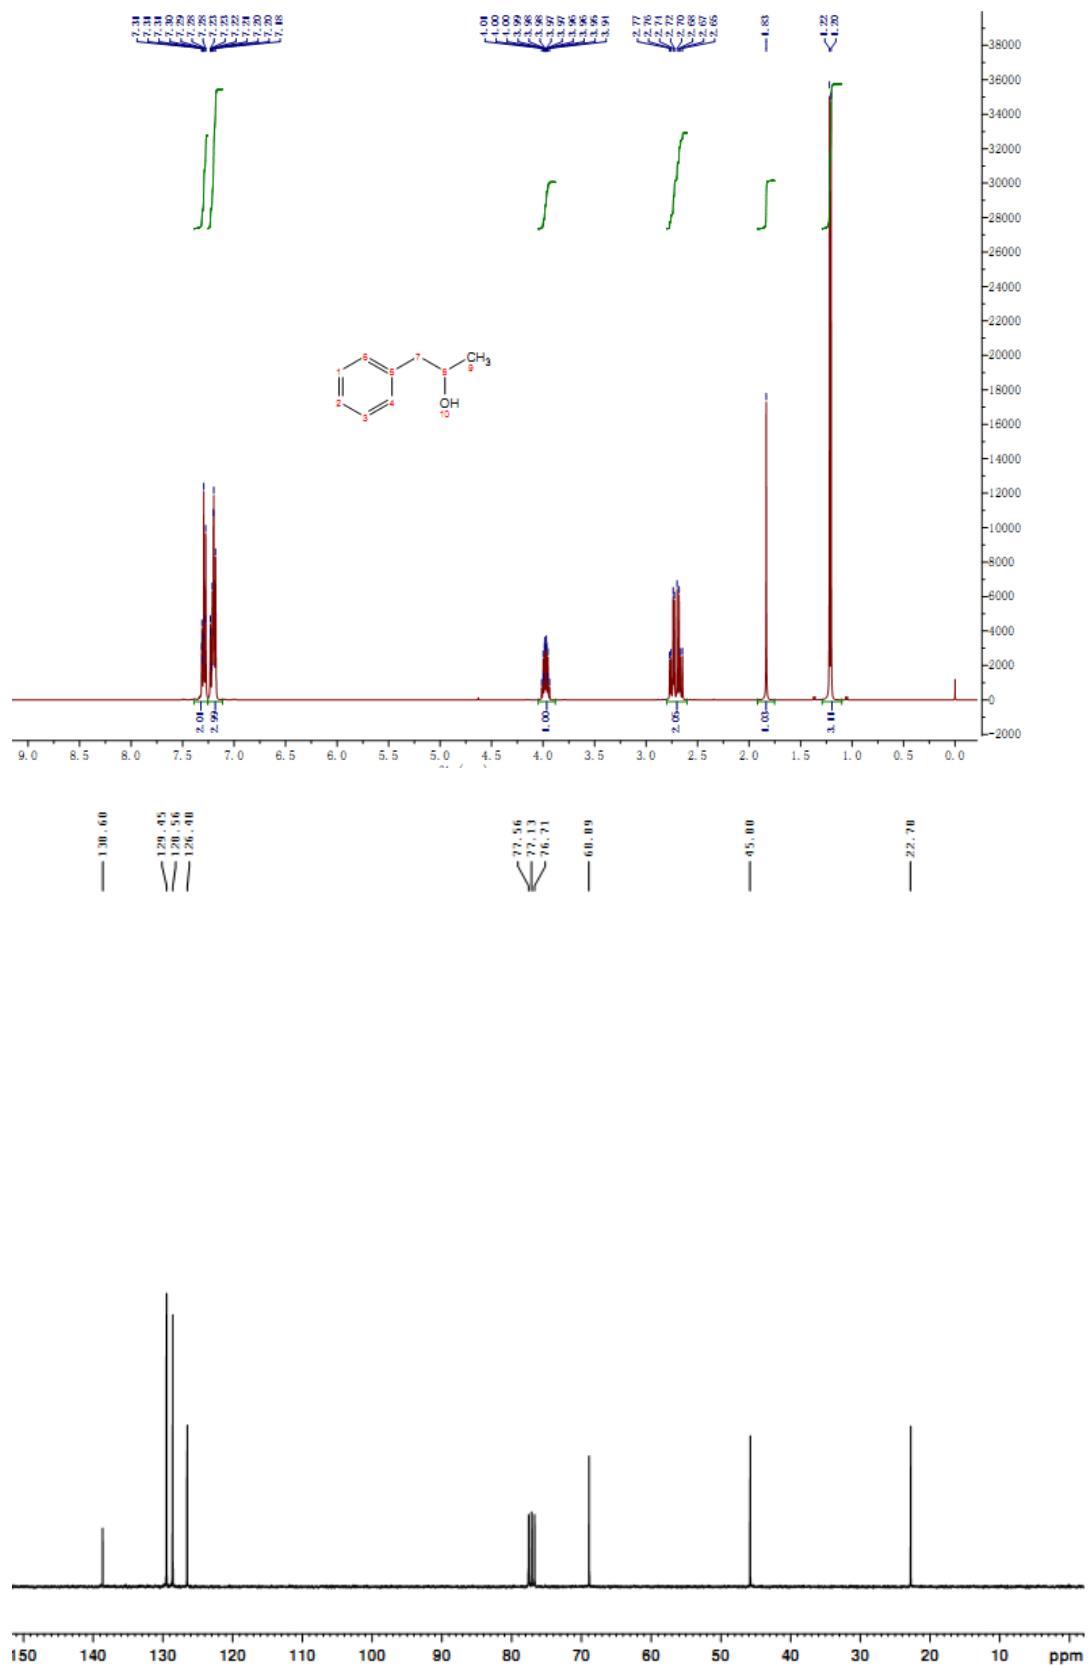

2u



Feb08-2012-casc2  
120208-xudq-18-1NMR

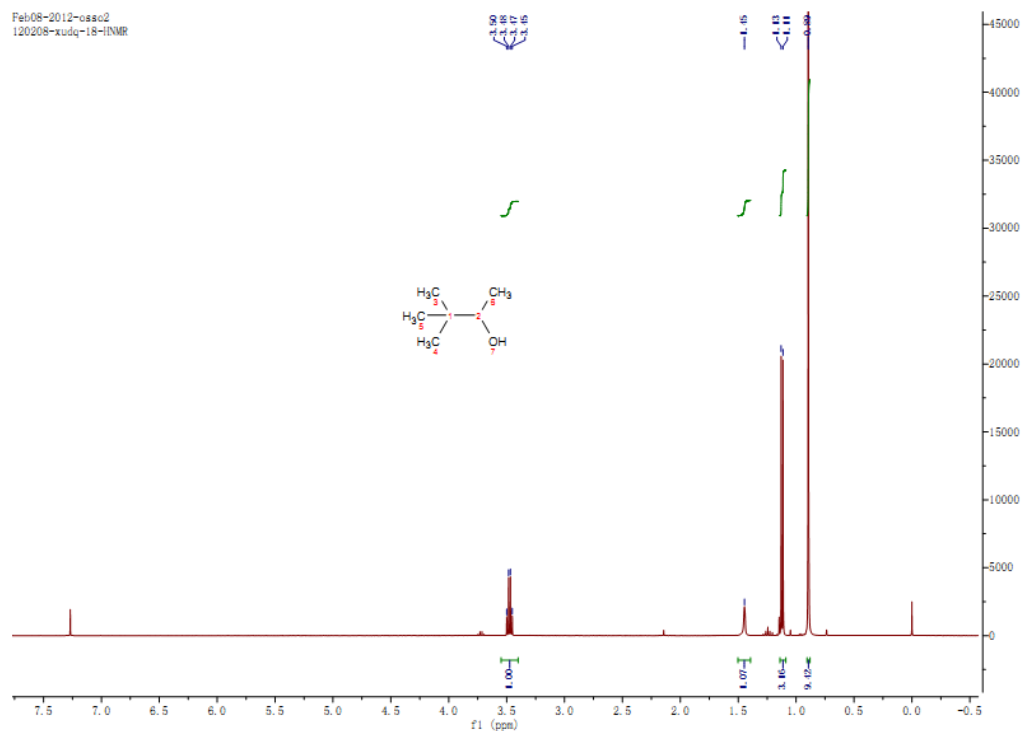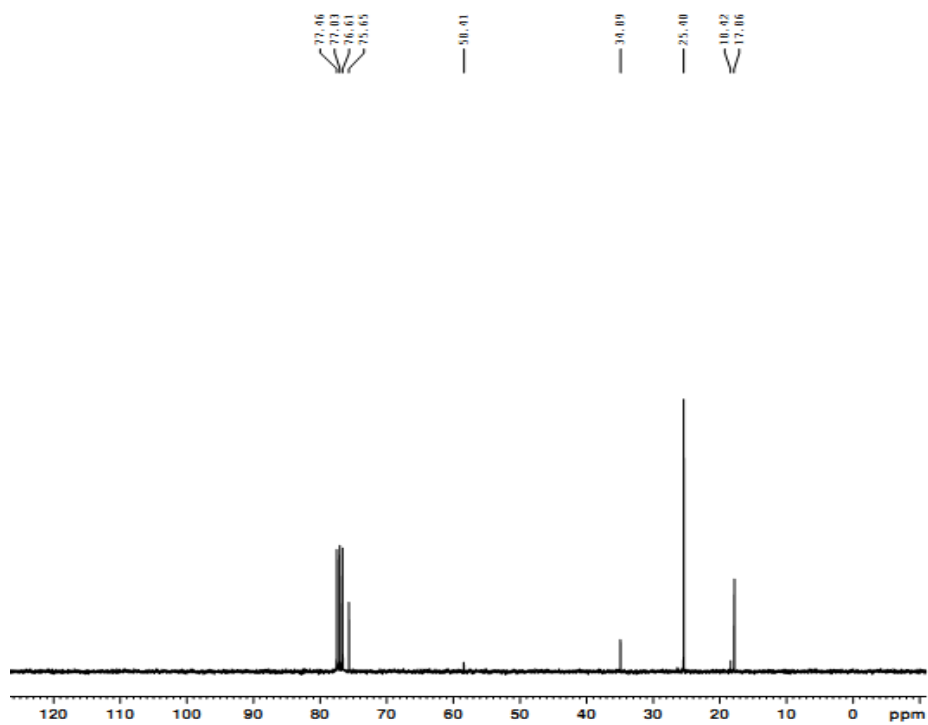

2v

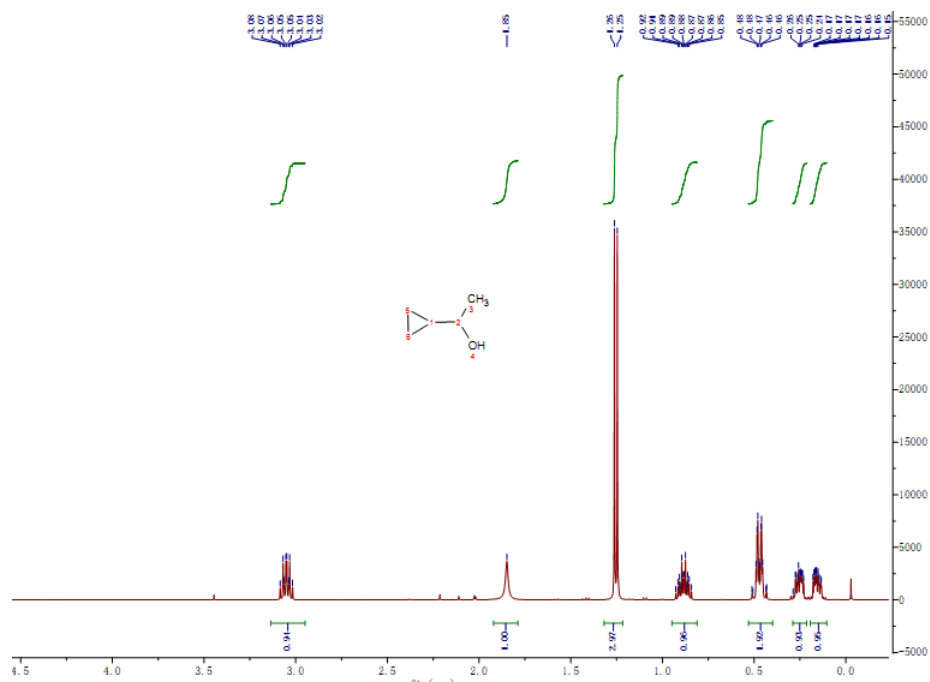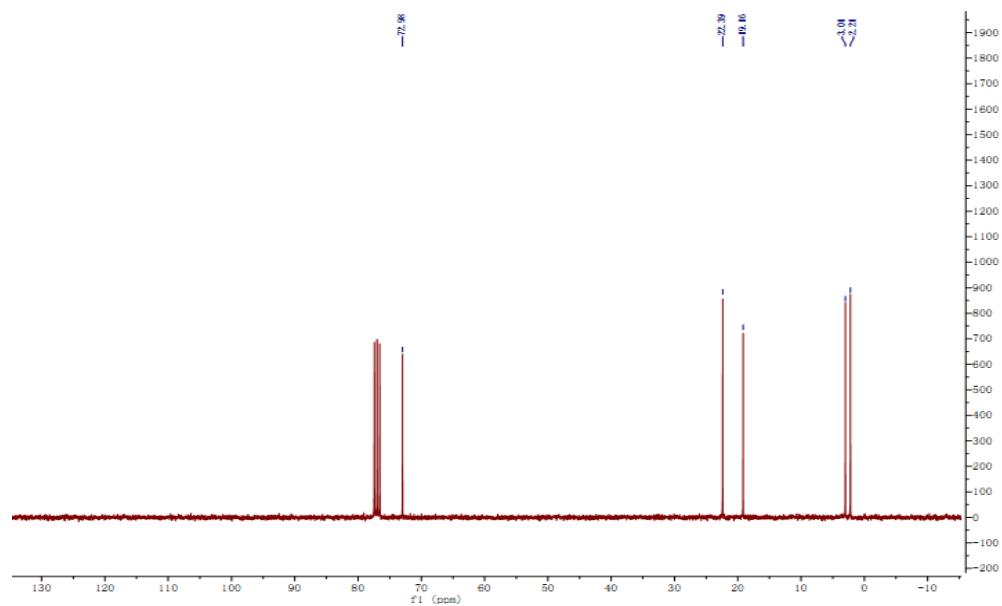

Supplement: c2ob07087a.pdf [file c2ob07087a.pdf]
